# Supplementary material for: Regio- and stereoselective synthesis of new diaminocyclopentanols
Source: publisher site journal article supplement (doi:10.3762/bjoc.10.262), 2014-10-28

## Supporting Information

for

# Regio- and stereoselective synthesis of new diaminocyclopentanols

Evgeni A. Larin\*<sup>1</sup>, Valeri S. Kochubei<sup>1</sup> and Yuri M. Atroshchenko<sup>2</sup>

Address: <sup>1</sup>Organic Synthesis Department, Asinex Corporation, 101 North Chestnut, Winston-Salem 27101, NC, USA and <sup>2</sup>Organic Chemistry and Biochemistry Department, Tolstoi State Pedagogical University, 126 Lenin, Tula 300026, Russian Federation

Email: Evgeni Anatolyevich Larin\* – elarin@asinex.com

\* Corresponding author

### Copies of <sup>1</sup>H and <sup>13</sup>C NMR spectra

#### Table of contents

|                                           |      |
|-------------------------------------------|------|
| <sup>1</sup> H NMR spectrum of <b>3a</b>  | S-3  |
| <sup>1</sup> H NMR spectrum of <b>3b</b>  | S-4  |
| <sup>1</sup> H NMR spectrum of <b>3c</b>  | S-5  |
| <sup>1</sup> H NMR spectrum of <b>3d</b>  | S-6  |
| <sup>1</sup> H NMR spectrum of <b>6a</b>  | S-7  |
| <sup>1</sup> H NMR spectrum of <b>6b</b>  | S-8  |
| <sup>1</sup> H NMR spectrum of <b>8a</b>  | S-9  |
| <sup>1</sup> H NMR spectrum of <b>8b</b>  | S-10 |
| <sup>13</sup> C NMR spectrum of <b>8b</b> | S-11 |
| <sup>1</sup> H NMR spectrum of <b>8c</b>  | S-12 |

|                                                                       |      |
|-----------------------------------------------------------------------|------|
| <sup>13</sup> C NMR spectrum of <b>8c</b>                             | S-13 |
| <sup>1</sup> H NMR spectrum of <b>8d</b>                              | S-14 |
| <sup>1</sup> H NMR spectrum of <b>9a</b>                              | S-15 |
| <sup>1</sup> H NMR spectrum of <b>10a</b>                             | S-16 |
| <sup>1</sup> H NMR spectrum of <b>9b</b>                              | S-17 |
| <sup>13</sup> C NMR spectrum of <b>9b</b>                             | S-18 |
| <sup>1</sup> H NMR spectrum of <b>10b</b>                             | S-19 |
| <sup>1</sup> H NMR spectrum of <b>9c</b>                              | S-20 |
| <sup>13</sup> C NMR spectrum of <b>9c</b>                             | S-21 |
| <sup>1</sup> H NMR spectrum of <b>10c</b>                             | S-22 |
| <sup>1</sup> H NMR spectrum of <b>9d</b>                              | S-23 |
| <sup>1</sup> H NMR spectrum of <b>10d</b>                             | S-24 |
| <sup>1</sup> H NMR spectrum of the mixture of <b>11</b> and <b>12</b> | S-25 |
| <sup>1</sup> H NMR spectrum of <b>13a</b>                             | S-26 |
| <sup>1</sup> H NMR spectrum of <b>13b</b>                             | S-27 |
| <sup>1</sup> H NMR spectrum of <b>14a</b>                             | S-28 |
| <sup>1</sup> H NMR spectrum of <b>14b</b>                             | S-29 |
| <sup>1</sup> H NMR spectrum of <b>15</b>                              | S-30 |

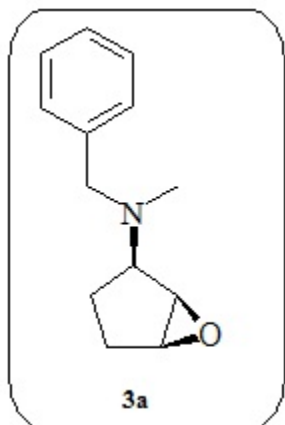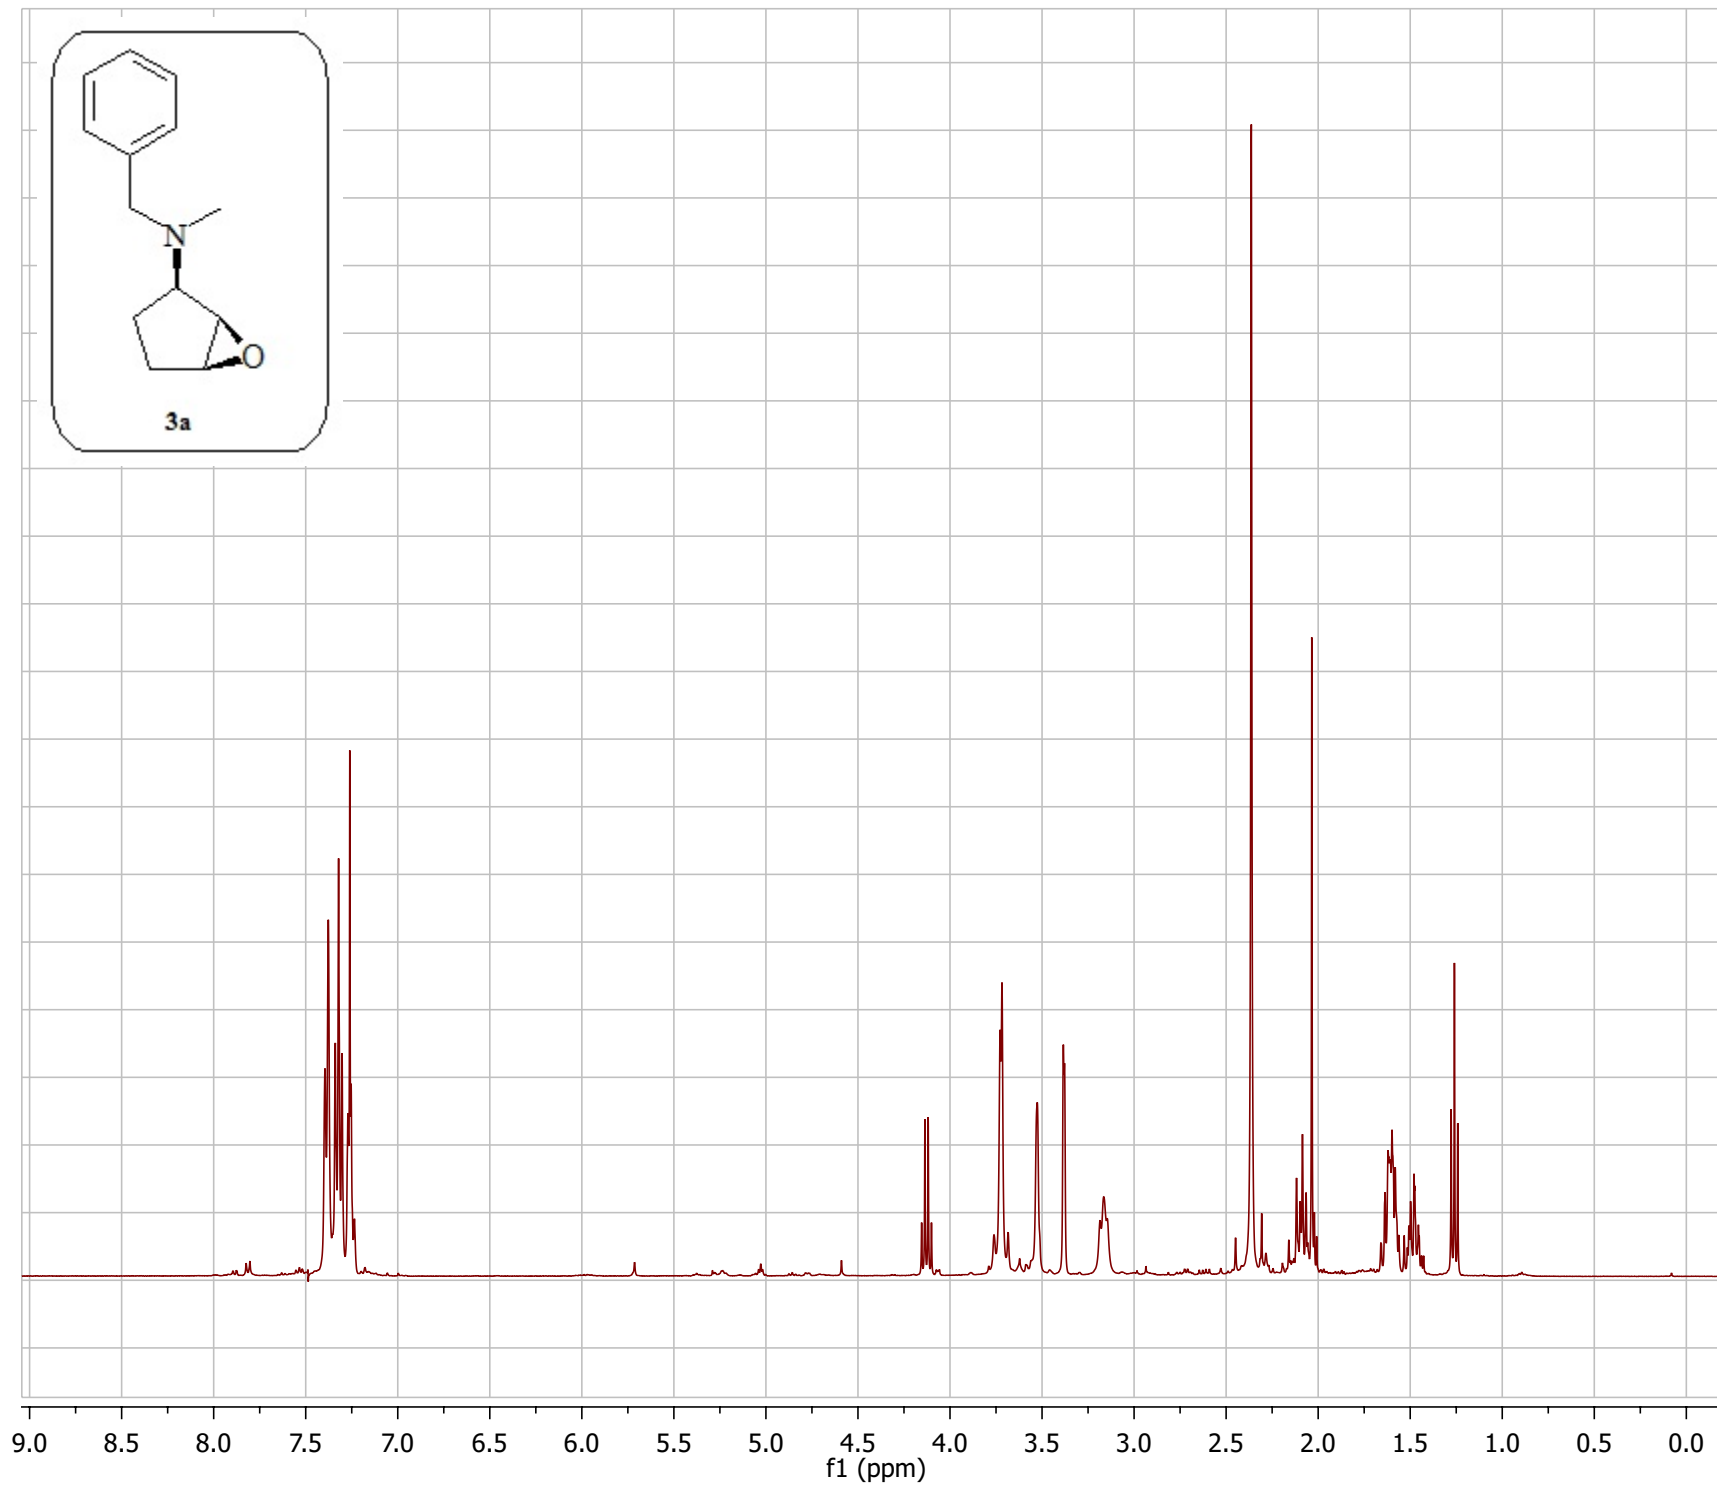

| Параметр                  | Значение |
|---------------------------|----------|
| 1 Origin                  | Varian   |
| 2 Spectrometer            | mercury  |
| 3 Author                  | vnmr1    |
| 4 Solvent                 | CDCl3    |
| 5 Temperature             | 50.0     |
| 6 Pulse Sequence          | s222     |
| 7 Number of Scans         | 10       |
| 8 Receiver Gain           | 16       |
| 9 Relaxation Delay        | 3.0000   |
| 10 Pulse Width            | 0.0000   |
| 11 Acquisition Time       | 1.4000   |
| 12 Gradient Duration      | 0.0020   |
| 13 Spectrometer Frequency | 400.45   |
| 14 Spectral Width         | 6802.7   |
| 15 Lowest Frequency       | -403.2   |
| 16 Nucleus                | 1H       |
| 17 Acquired Size          | 9524     |
| 18 Spectral Size          | 32768    |

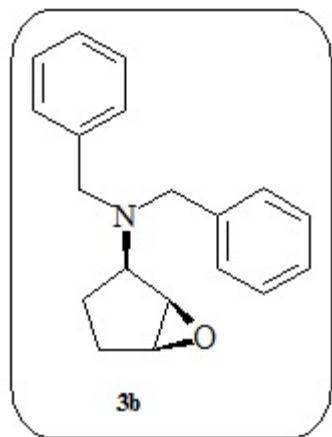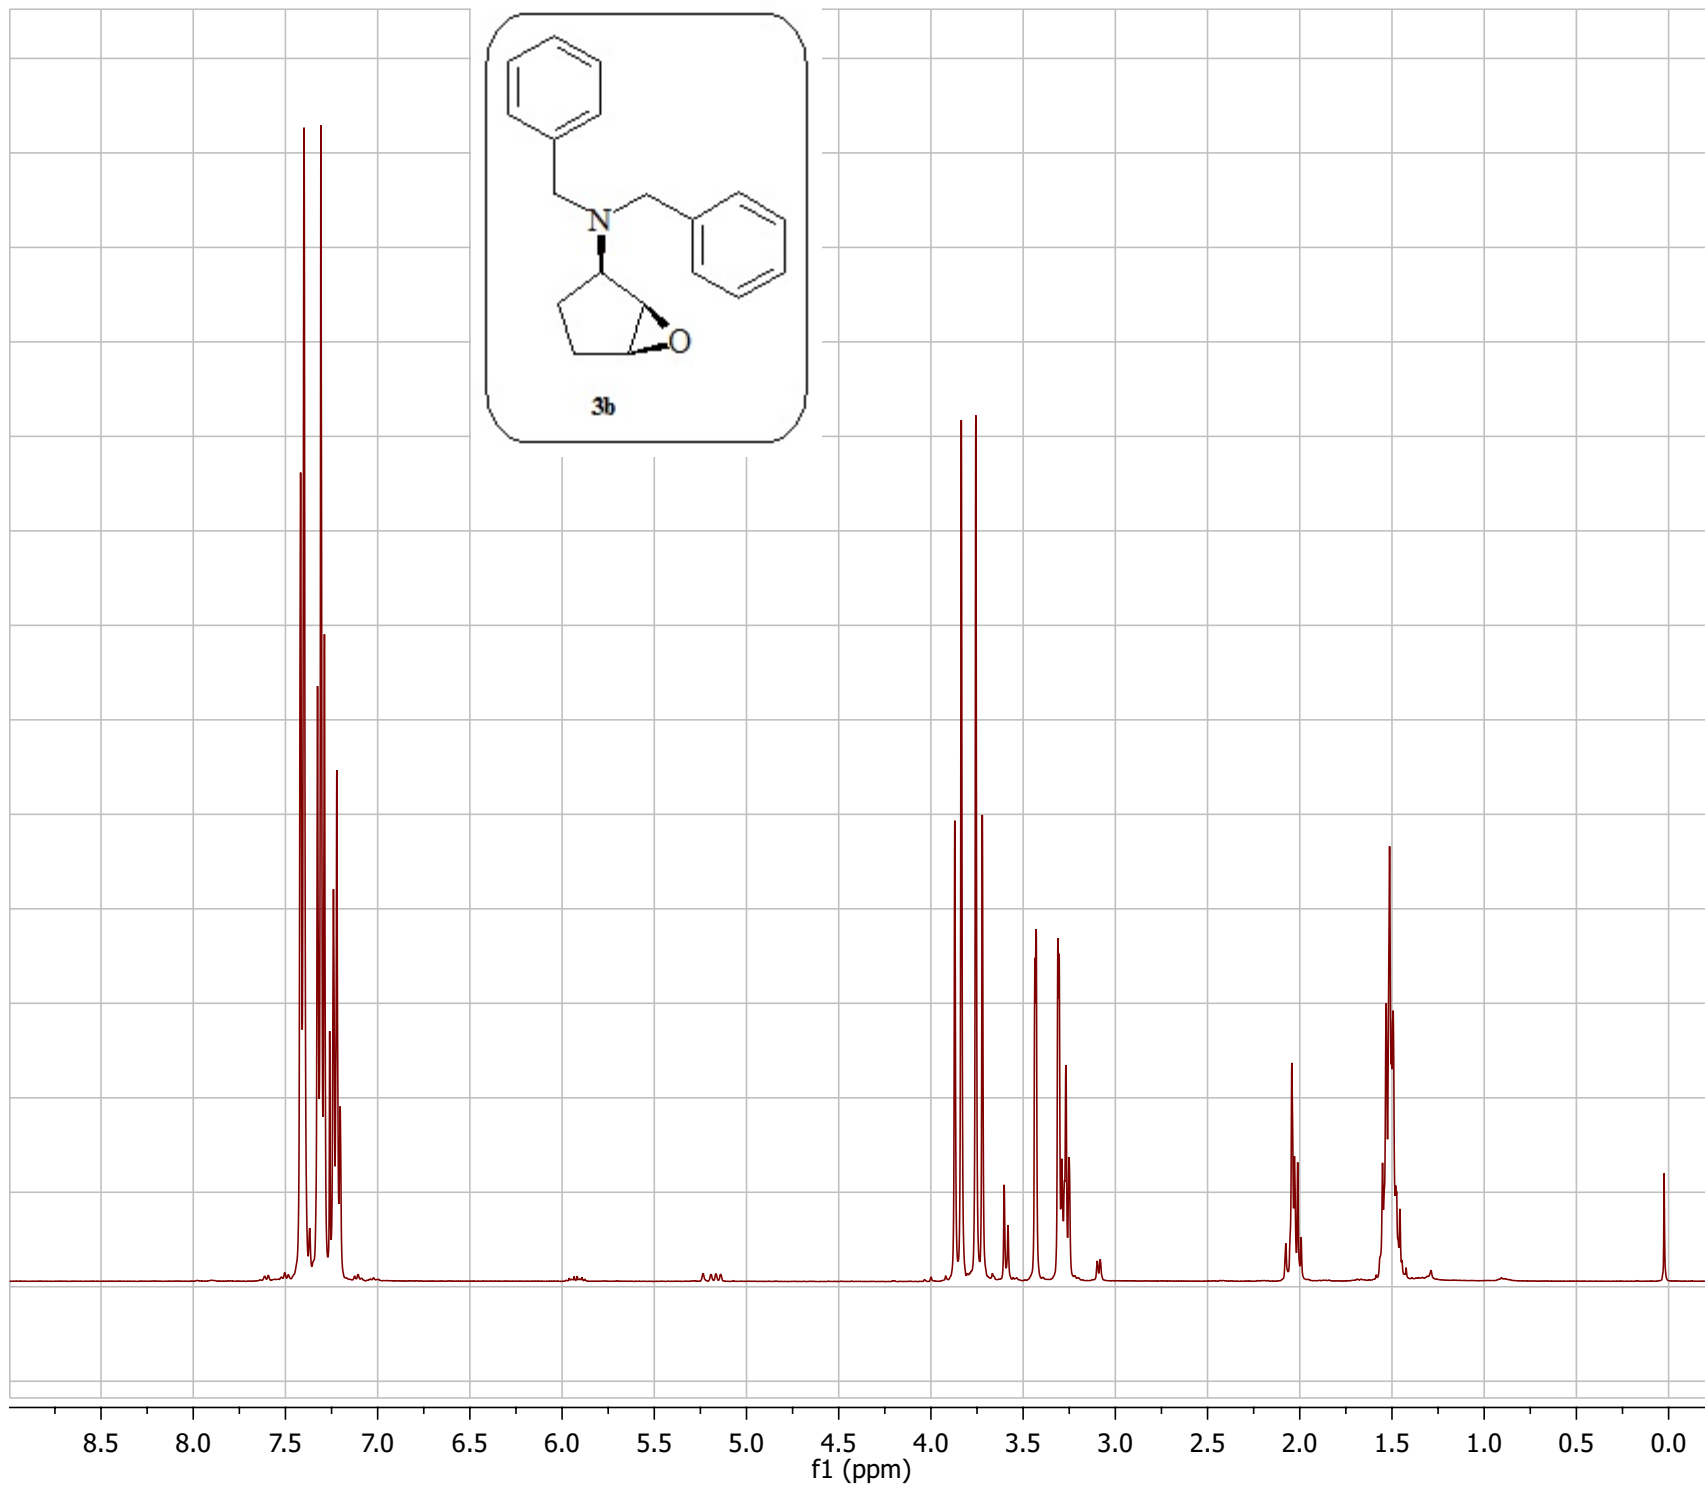

| Параметр                  | Значение |
|---------------------------|----------|
| 1 Origin                  | Varian   |
| 2 Spectrometer            | mercury  |
| 3 Author                  | vnmr1    |
| 4 Solvent                 | CDCl3    |
| 5 Temperature             | 50.0     |
| 6 Pulse Sequence          | s222     |
| 7 Number of Scans         | 4        |
| 8 Receiver Gain           | 16       |
| 9 Relaxation Delay        | 3.0000   |
| 10 Pulse Width            | 0.0000   |
| 11 Acquisition Time       | 1.4000   |
| 12 Gradient Duration      | 0.0020   |
| 13 Spectrometer Frequency | 400.45   |
| 14 Spectral Width         | 6802.7   |
| 15 Lowest Frequency       | -403.2   |
| 16 Nucleus                | 1H       |
| 17 Acquired Size          | 9524     |
| 18 Spectral Size          | 32768    |

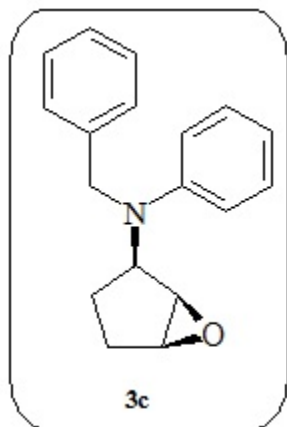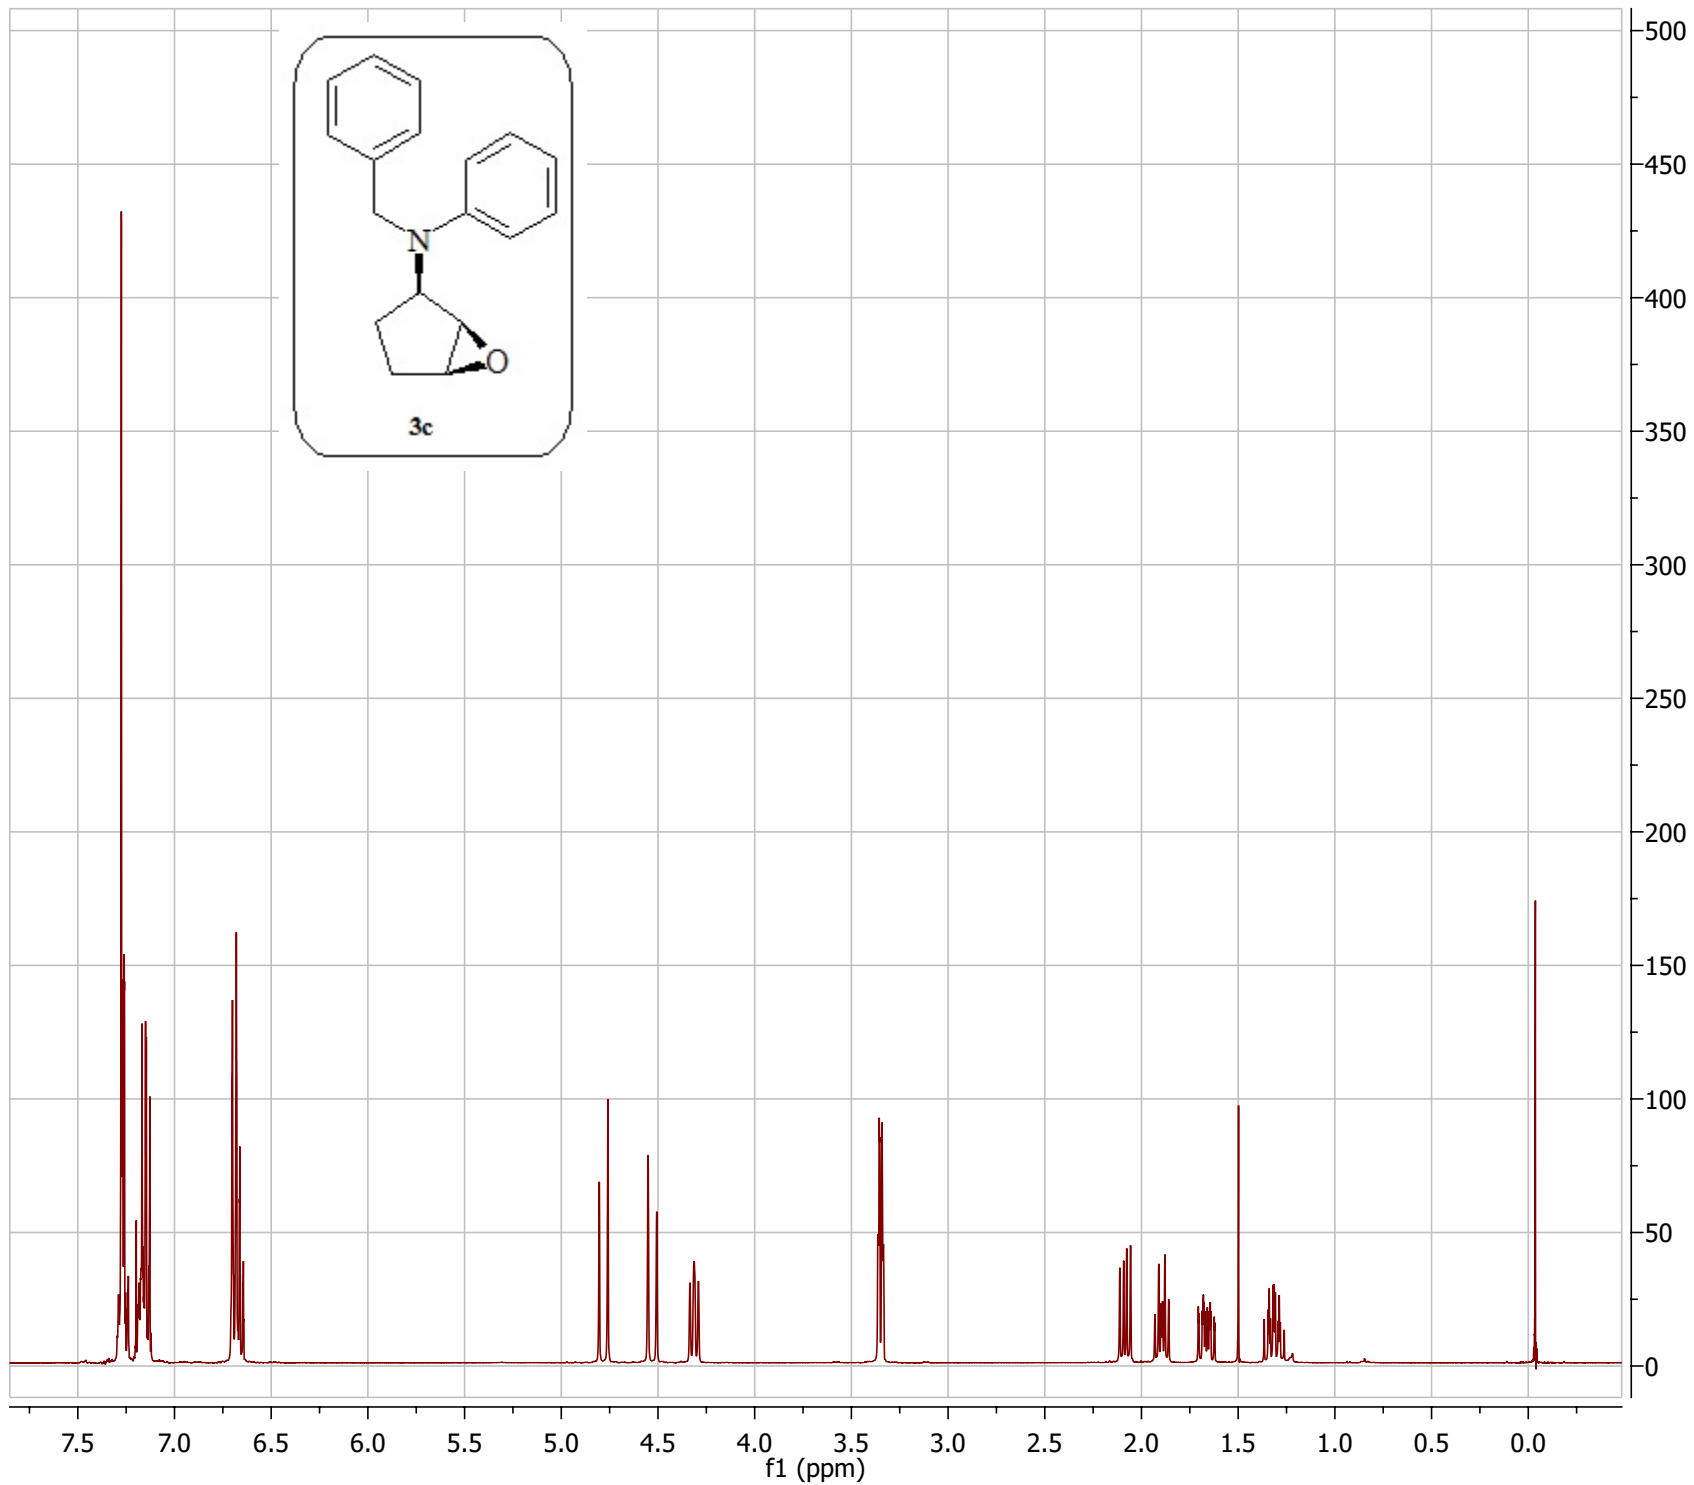

| Параметр                  | Значение |
|---------------------------|----------|
| 1 Origin                  | Varian   |
| 2 Spectrometer            | vnmrs    |
| 3 Author                  | chemp    |
| 4 Solvent                 | cdcl3    |
| 5 Temperature             | 34.0     |
| 6 Pulse Sequence          | s2pul    |
| 7 Number of Scans         | 16       |
| 8 Receiver Gain           | 30       |
| 9 Relaxation Delay        | 1.0000   |
| 10 Pulse Width            | 0.0000   |
| 11 Acquisition Time       | 2.5559   |
| 12 Gradient Duration      | 0.0010   |
| 13 Spectrometer Frequency | 399.70   |
| 14 Spectral Width         | 6410.3   |
| 15 Lowest Frequency       | -825.5   |
| 16 Nucleus                | 1H       |
| 17 Acquired Size          | 16384    |
| 18 Spectral Size          | 32768    |

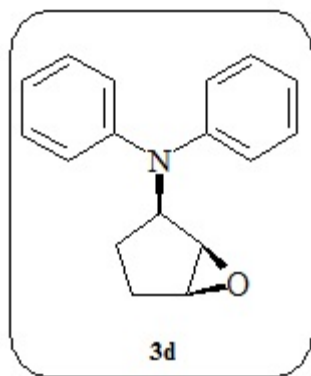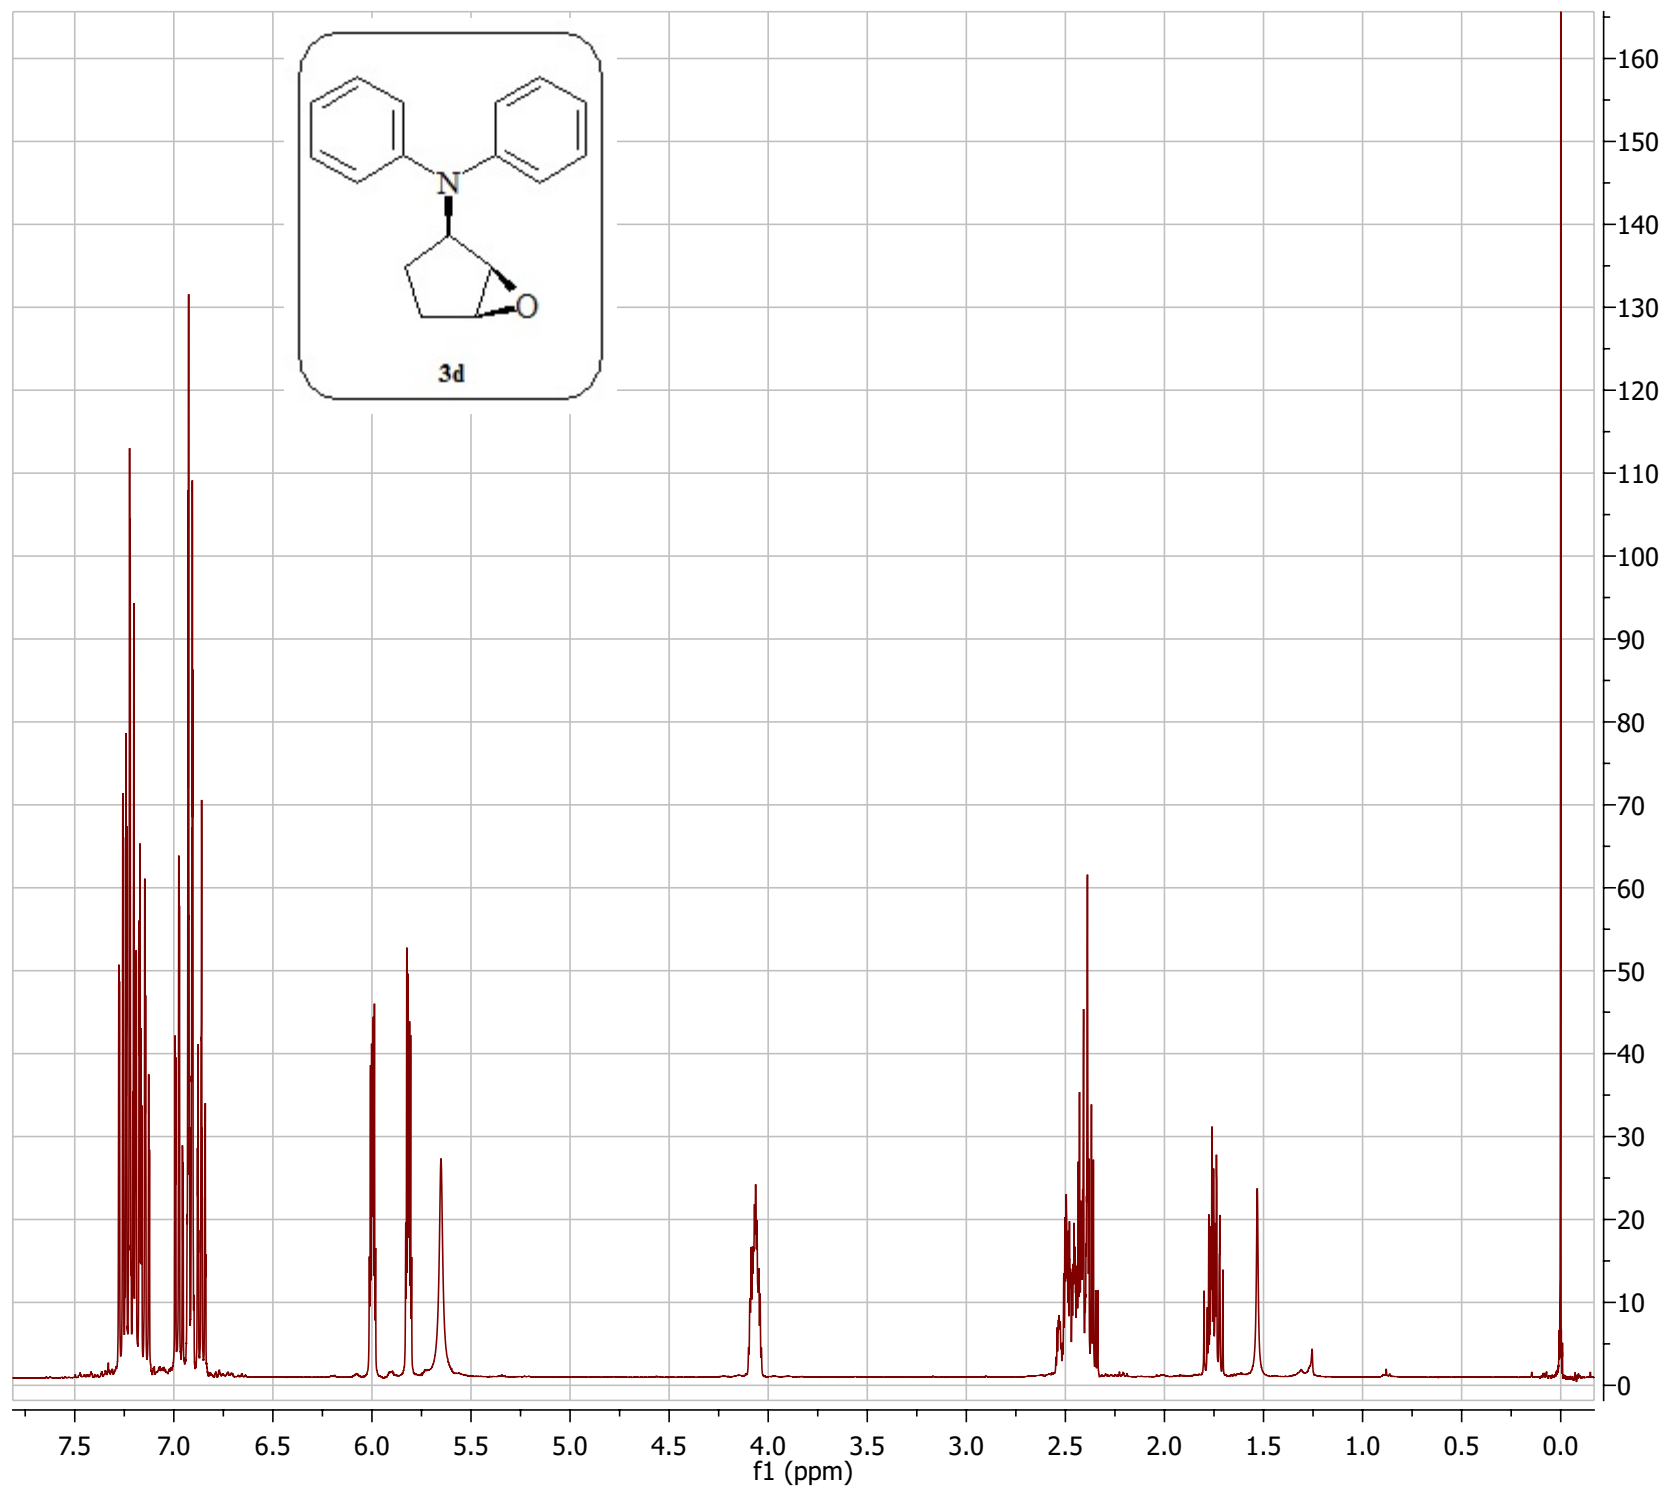

| Параметр                  | Значение       |
|---------------------------|----------------|
| 1 Origin                  | Varian         |
| 2 Spectrometer            | vnmrs          |
| 3 Author                  | chemp          |
| 4 Solvent                 | cdcl3          |
| 5 Temperature             | 34.0           |
| 6 Pulse Sequence          | s2pul          |
| 7 Number of Scans         | 16             |
| 8 Receiver Gain           | 30             |
| 9 Relaxation Delay        | 1.0000         |
| 10 Pulse Width            | 0.0000         |
| 11 Acquisition Time       | 2.5559         |
| 12 Gradient Duration      | 0.0010         |
| 13 Spectrometer Frequency | 399.70         |
| 14 Spectral Width         | 6410.3         |
| 15 Lowest Frequency       | -808.3         |
| 16 Nucleus                | <sup>1</sup> H |
| 17 Acquired Size          | 16384          |
| 18 Spectral Size          | 32768          |

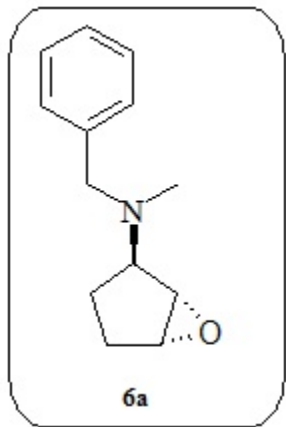

| Параметр                  | Значение       |
|---------------------------|----------------|
| 1 Origin                  | Varian         |
| 2 Spectrometer            | mercury        |
| 3 Author                  | vnmr1          |
| 4 Solvent                 | CDCl3          |
| 5 Temperature             | 63.0           |
| 6 Pulse Sequence          | s2pul          |
| 7 Number of Scans         | 16             |
| 8 Receiver Gain           | 4              |
| 9 Relaxation Delay        | 3.0000         |
| 10 Pulse Width            | 0.0000         |
| 11 Acquisition Time       | 1.4022         |
| 12 Gradient Duration      | 0.0020         |
| 13 Spectrometer Frequency | 400.45         |
| 14 Spectral Width         | 2936.9         |
| 15 Lowest Frequency       | 307.4          |
| 16 Nucleus                | <sup>1</sup> H |
| 17 Acquired Size          | 4118           |
| 18 Spectral Size          | 16384          |

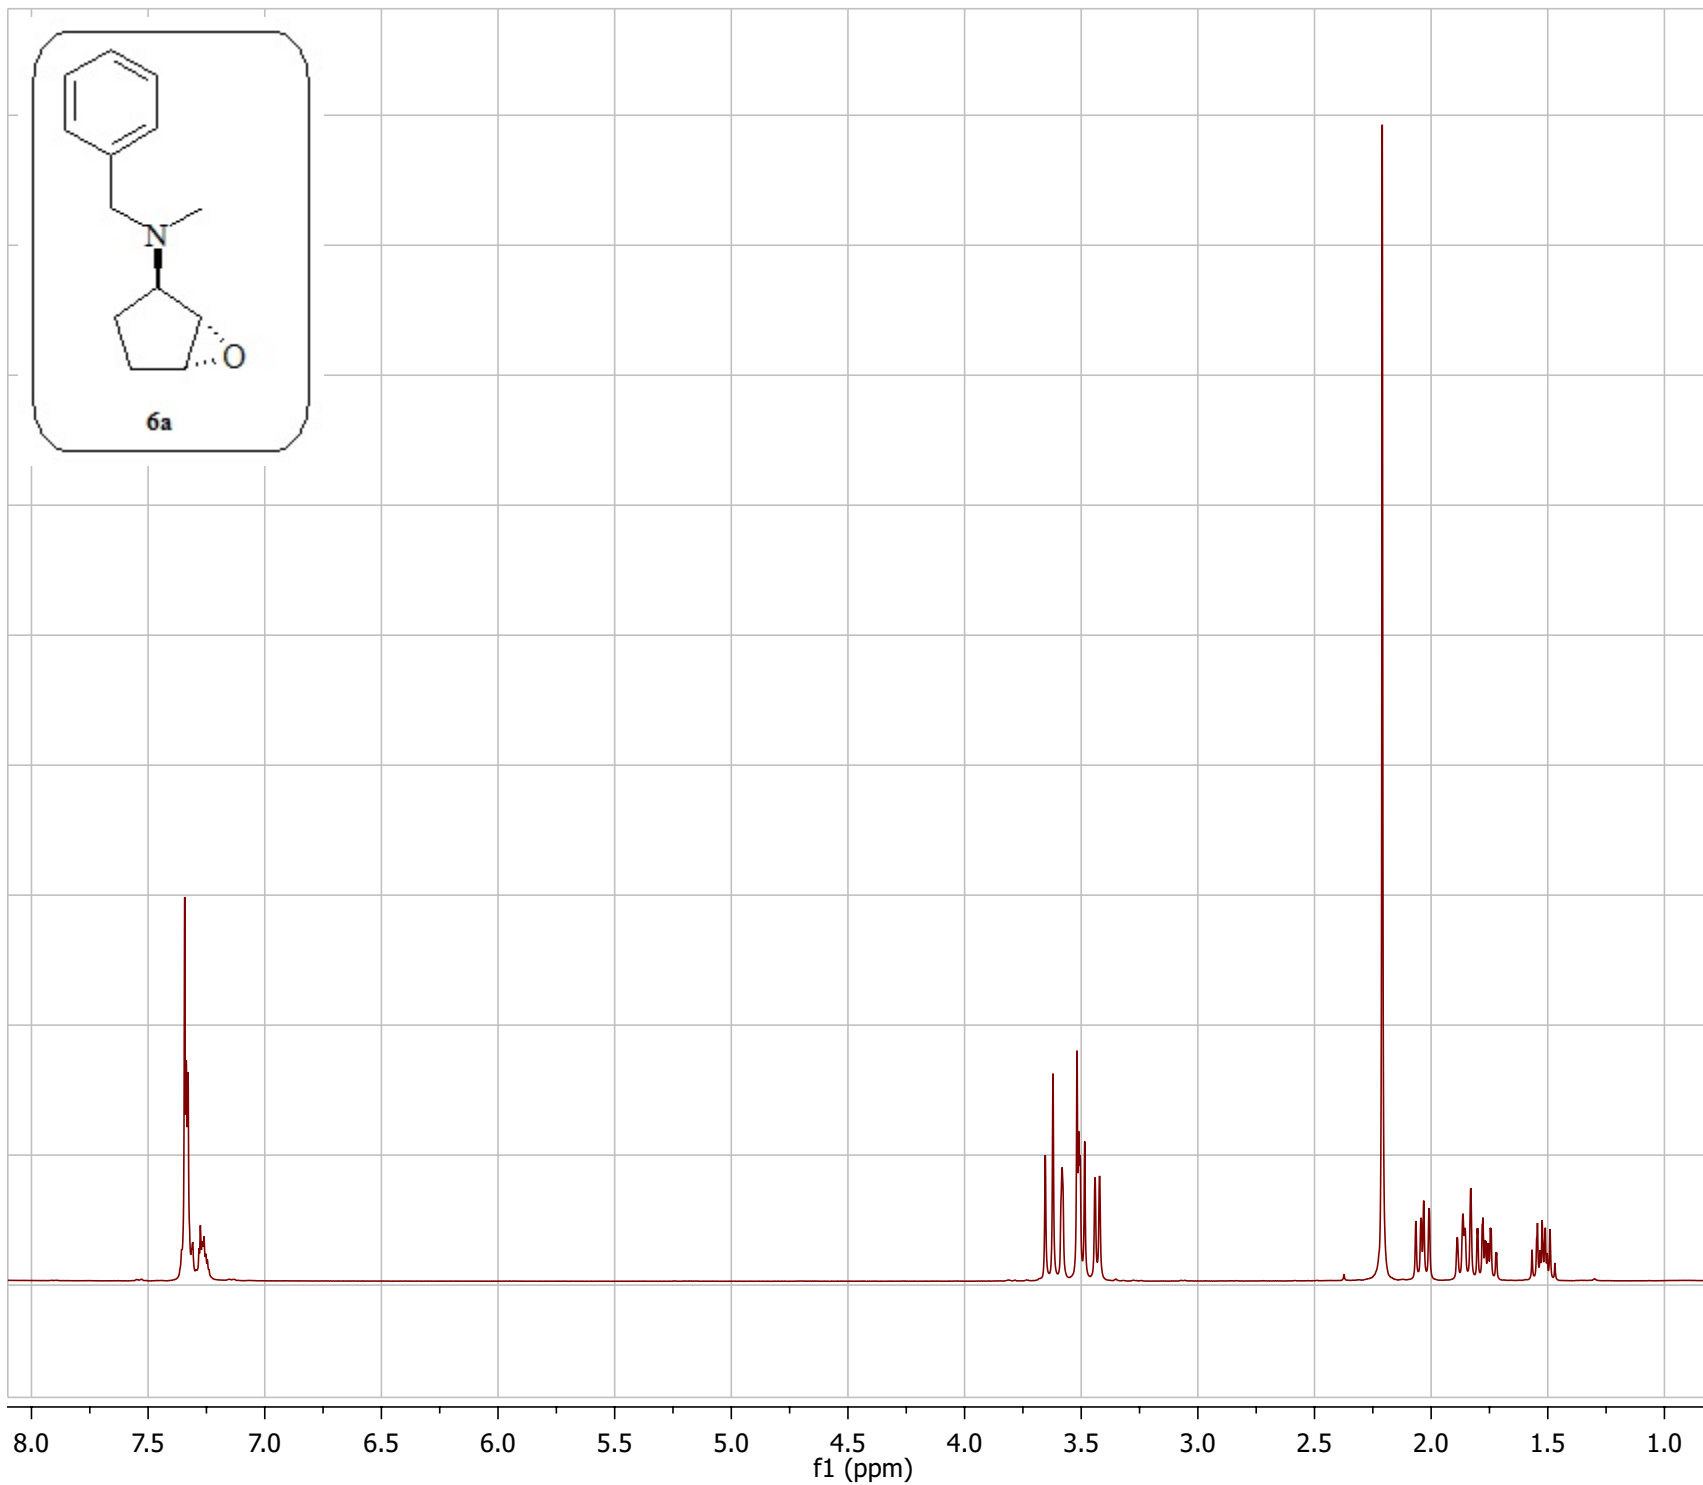

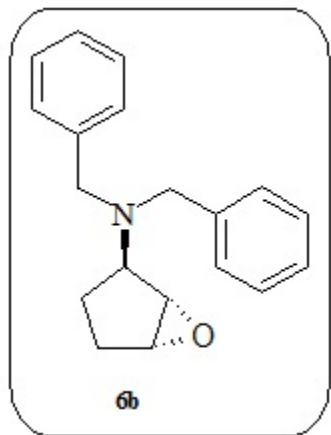

| Параметр                  | Значение       |
|---------------------------|----------------|
| 1 Origin                  | Varian         |
| 2 Spectrometer            | mercury        |
| 3 Author                  | vnmr1          |
| 4 Solvent                 | DMSO           |
| 5 Temperature             | 50.0           |
| 6 Pulse Sequence          | s2pul          |
| 7 Number of Scans         | 16             |
| 8 Receiver Gain           | 8              |
| 9 Relaxation Delay        | 3.0000         |
| 10 Pulse Width            | 0.0000         |
| 11 Acquisition Time       | 2.5000         |
| 12 Gradient Duration      | 0.0020         |
| 13 Spectrometer Frequency | 400.45         |
| 14 Spectral Width         | 2710.0         |
| 15 Lowest Frequency       | 418.5          |
| 16 Nucleus                | <sup>1</sup> H |
| 17 Acquired Size          | 6775           |
| 18 Spectral Size          | 16384          |

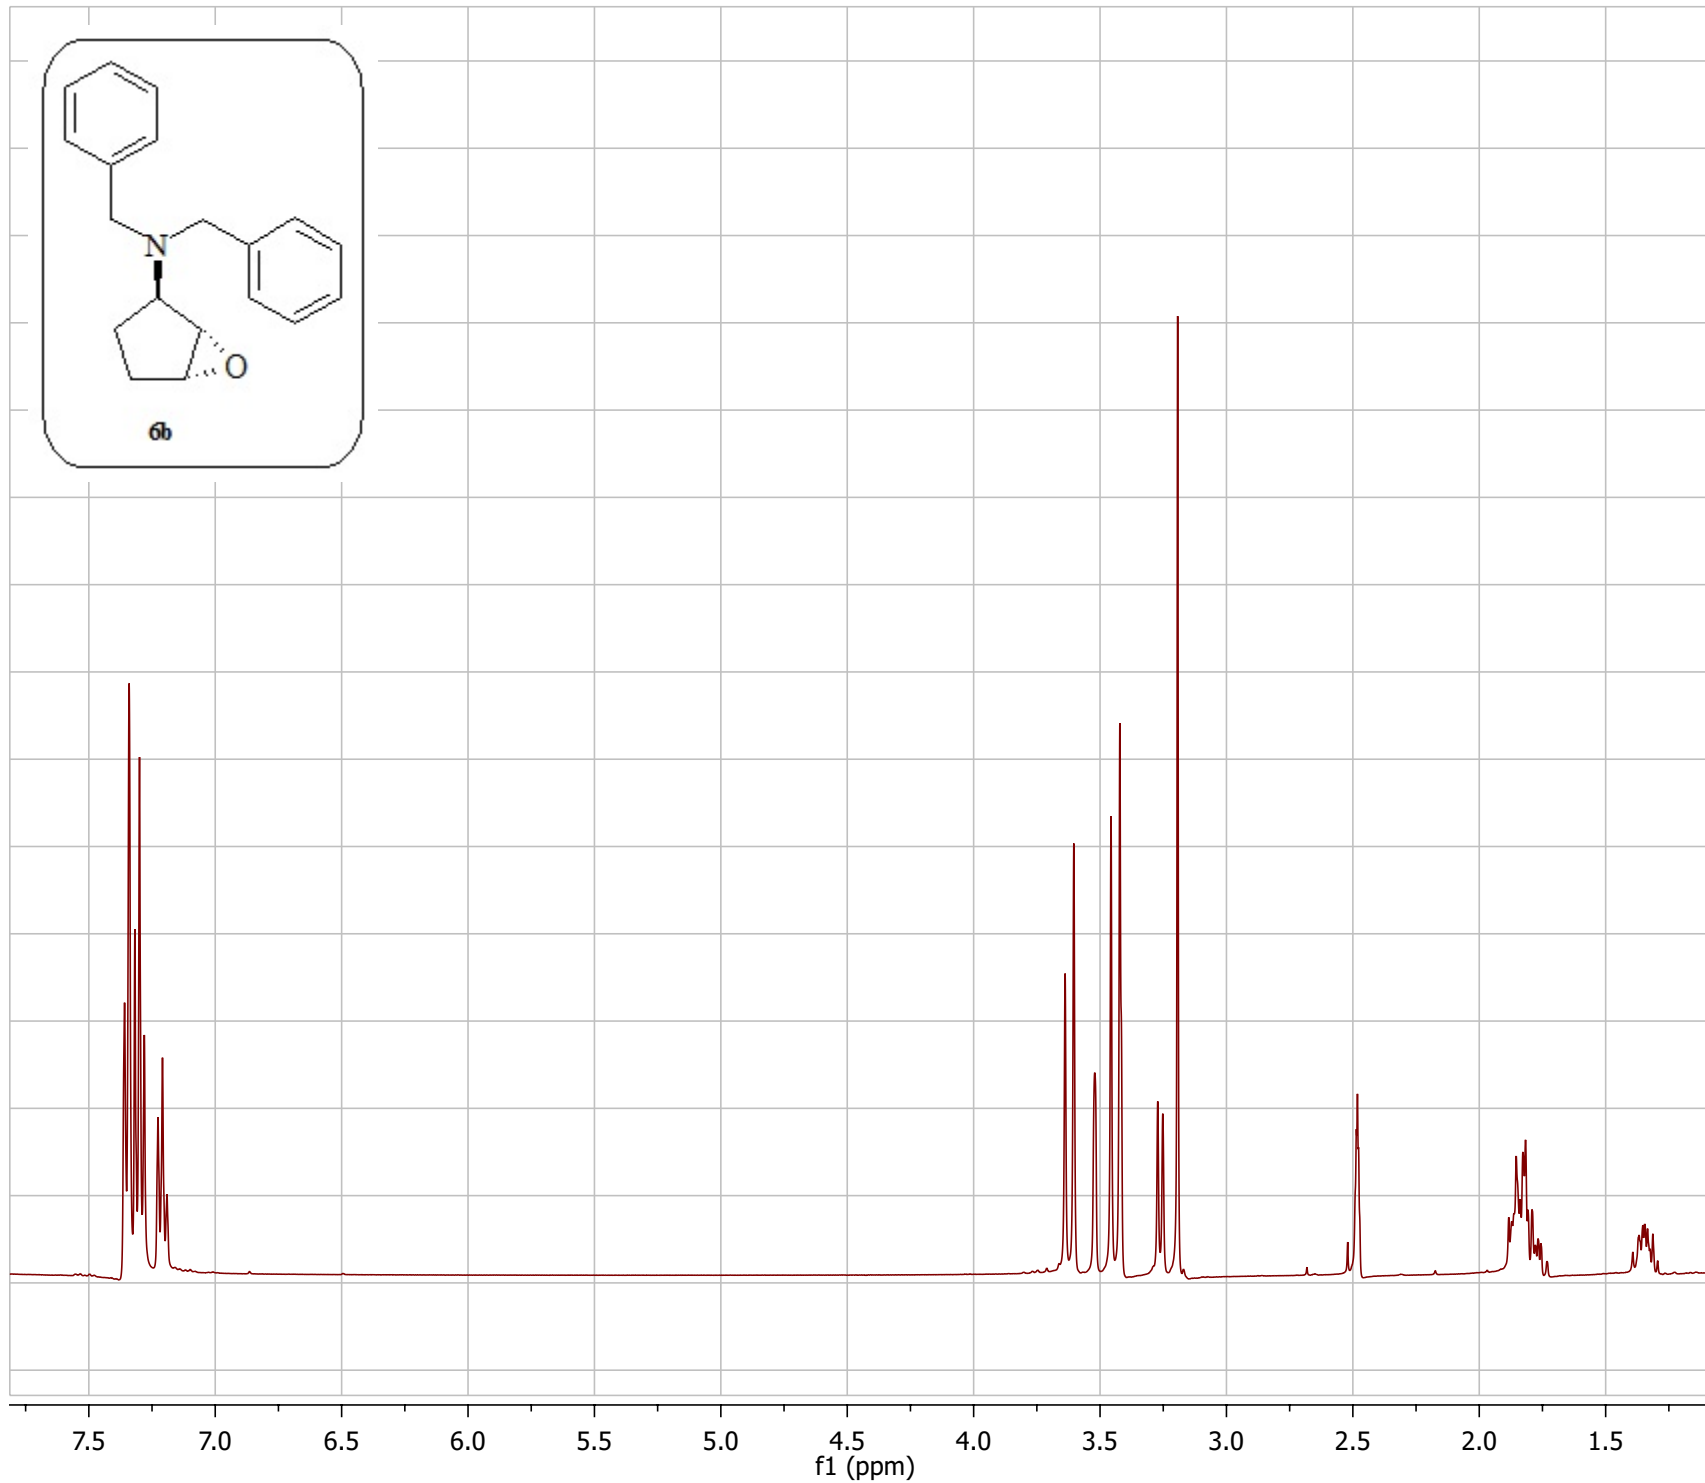



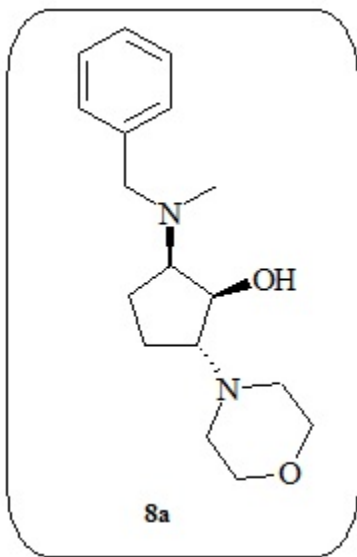

| Параметр                  | Значение       |
|---------------------------|----------------|
| 1 Origin                  | Varian         |
| 2 Spectrometer            | mercury        |
| 3 Author                  | vnmr1          |
| 4 Solvent                 | DMSO           |
| 5 Temperature             | 50.0           |
| 6 Pulse Sequence          | s2pul          |
| 7 Number of Scans         | 4              |
| 8 Receiver Gain           | 8              |
| 9 Relaxation Delay        | 3.0000         |
| 10 Pulse Width            | 0.0000         |
| 11 Acquisition Time       | 1.4012         |
| 12 Gradient Duration      | 0.0020         |
| 13 Spectrometer Frequency | 400.45         |
| 14 Spectral Width         | 2591.3         |
| 15 Lowest Frequency       | 413.7          |
| 16 Nucleus                | <sup>1</sup> H |
| 17 Acquired Size          | 3631           |
| 18 Spectral Size          | 8192           |

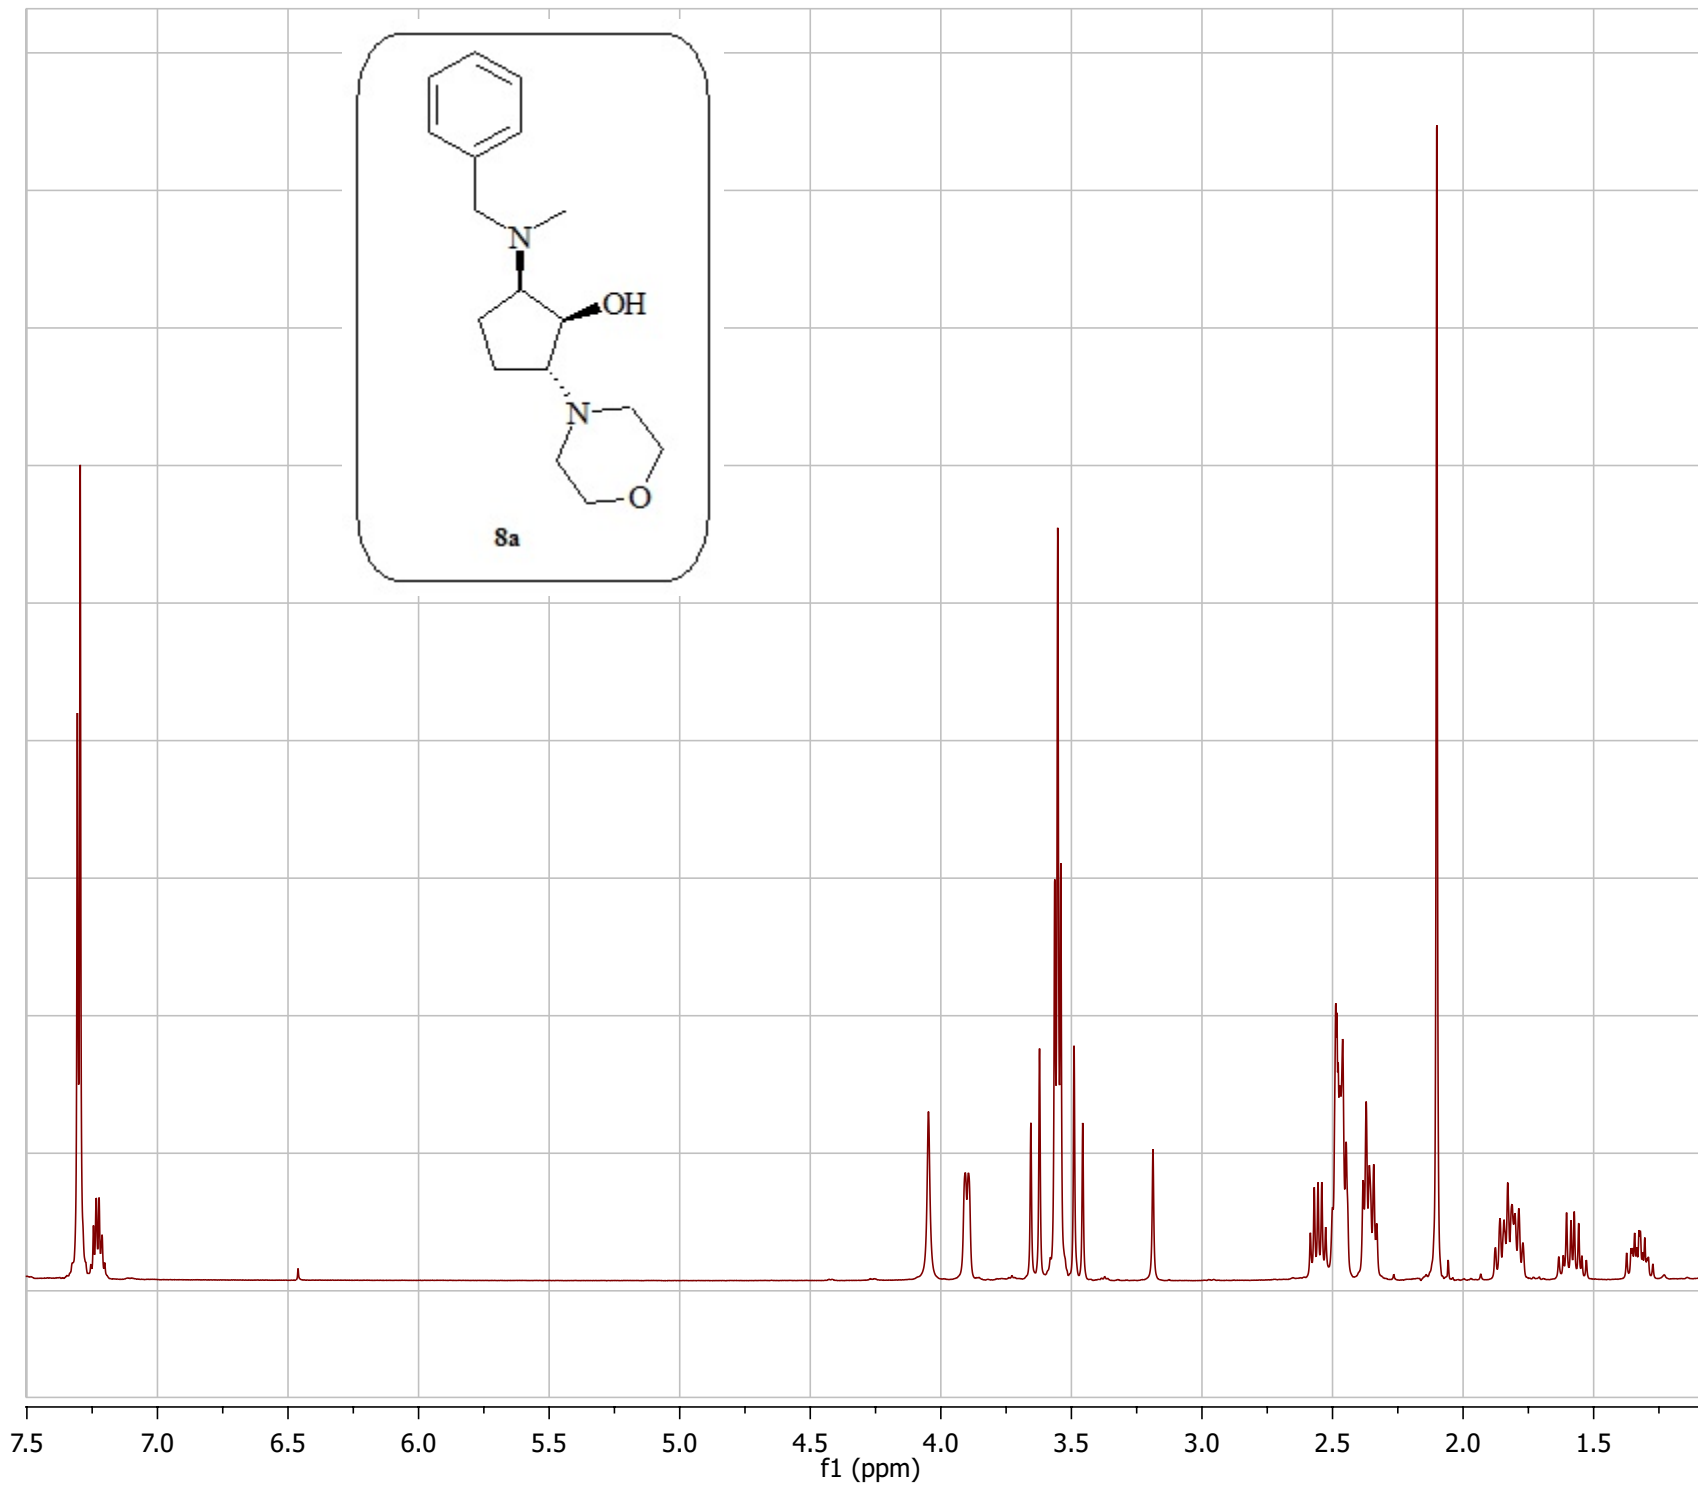

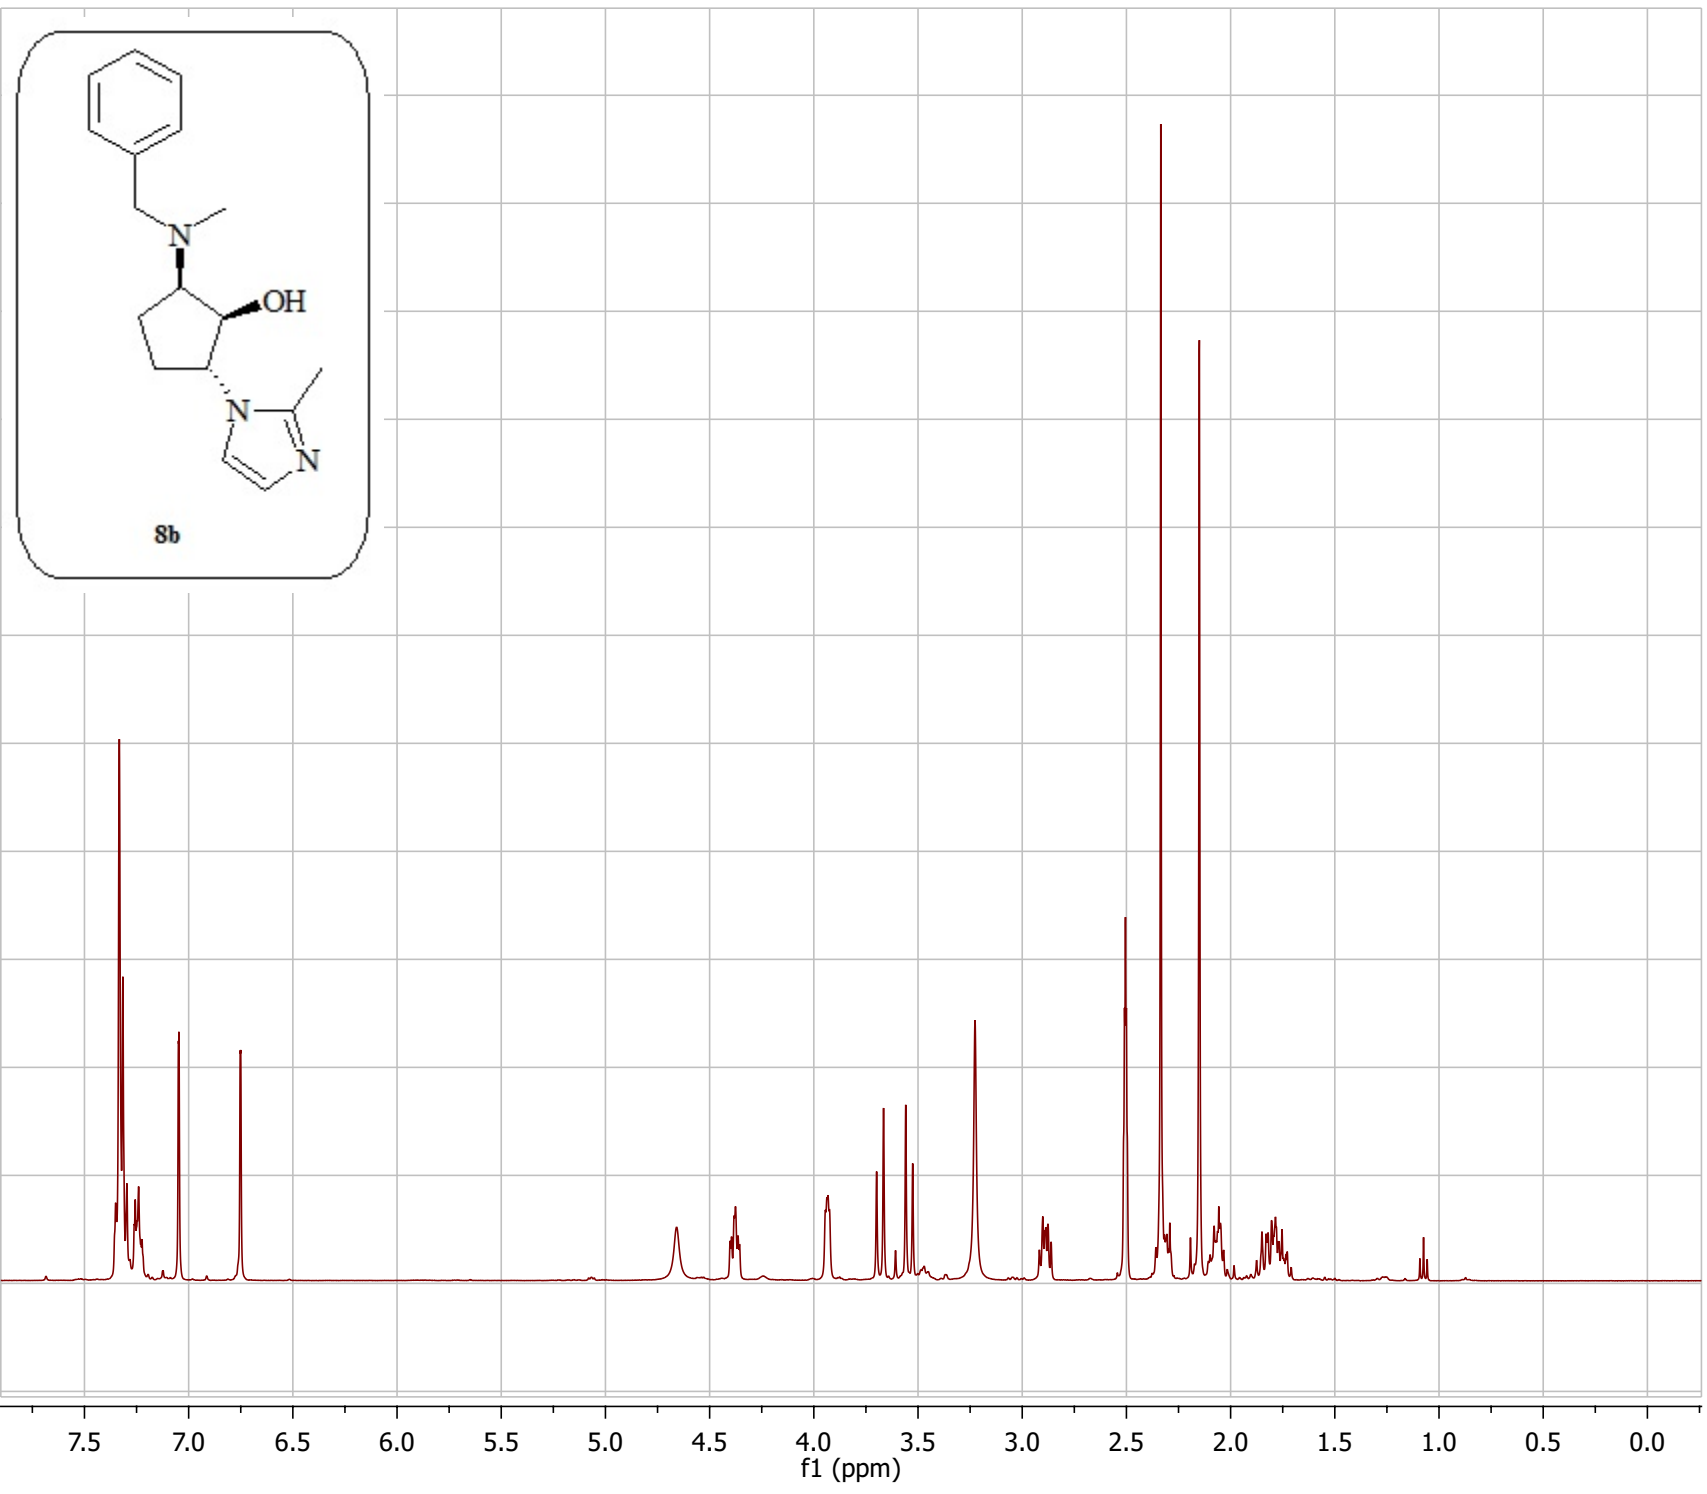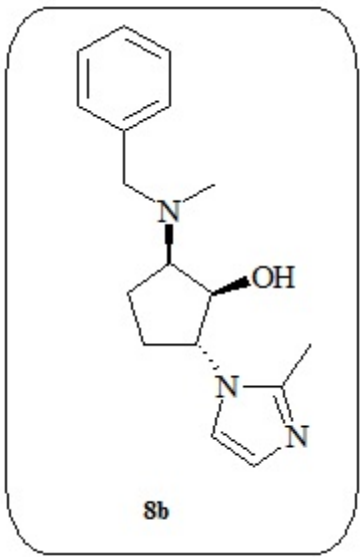

| Параметр                  | Значение |
|---------------------------|----------|
| 1 Origin                  | Varian   |
| 2 Spectrometer            | mercury  |
| 3 Author                  | vnmr1    |
| 4 Solvent                 | DMSO     |
| 5 Temperature             | 50.0     |
| 6 Pulse Sequence          | s222     |
| 7 Number of Scans         | 4        |
| 8 Receiver Gain           | 20       |
| 9 Relaxation Delay        | 3.0000   |
| 10 Pulse Width            | 0.0000   |
| 11 Acquisition Time       | 1.4000   |
| 12 Gradient Duration      | 0.0020   |
| 13 Spectrometer Frequency | 400.46   |
| 14 Spectral Width         | 6535.9   |
| 15 Lowest Frequency       | -375.7   |
| 16 Nucleus                | 1H       |
| 17 Acquired Size          | 9150     |
| 18 Spectral Size          | 32768    |

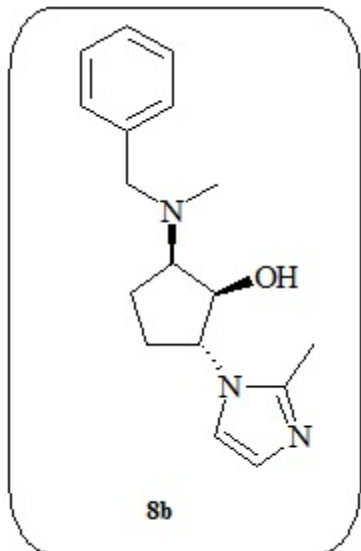

| Параметр                  | Значение |
|---------------------------|----------|
| 1 Origin                  | Varian   |
| 2 Spectrometer            | mercury  |
| 3 Author                  | vnmr1    |
| 4 Solvent                 | dms      |
| 5 Temperature             | 50.0     |
| 6 Pulse Sequence          | s2pul    |
| 7 Number of Scans         | 256      |
| 8 Receiver Gain           | 38       |
| 9 Relaxation Delay        | 3.0000   |
| 10 Pulse Width            | 0.0000   |
| 11 Acquisition Time       | 2.4448   |
| 12 Gradient Duration      | 0.0020   |
| 13 Spectrometer Frequency | 100.71   |
| 14 Spectral Width         | 26178.0  |
| 15 Lowest Frequency       | -1087.7  |
| 16 Nucleus                | 13C      |
| 17 Acquired Size          | 64000    |
| 18 Spectral Size          | 131072   |

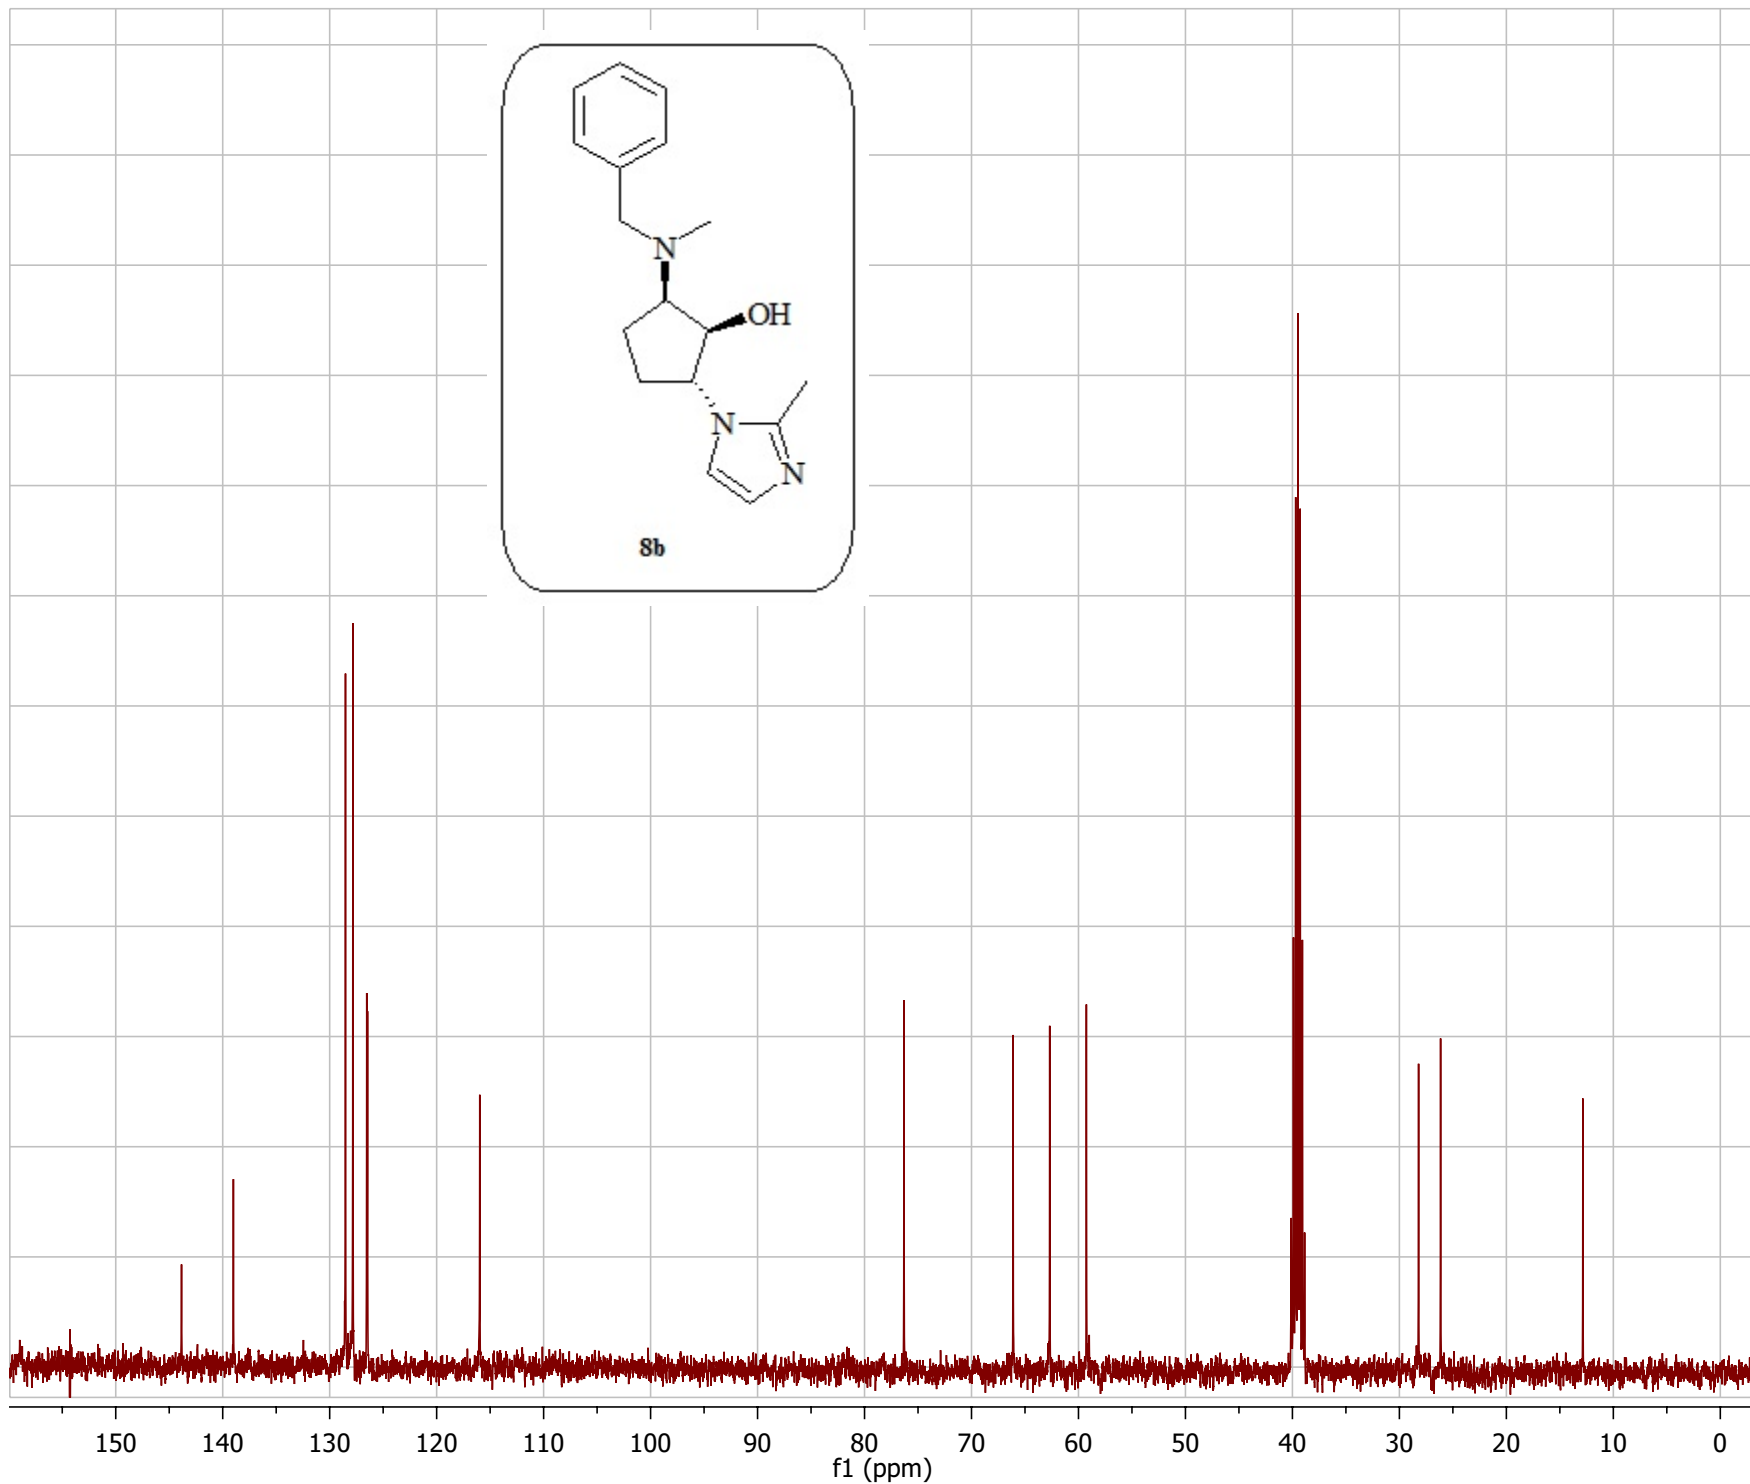

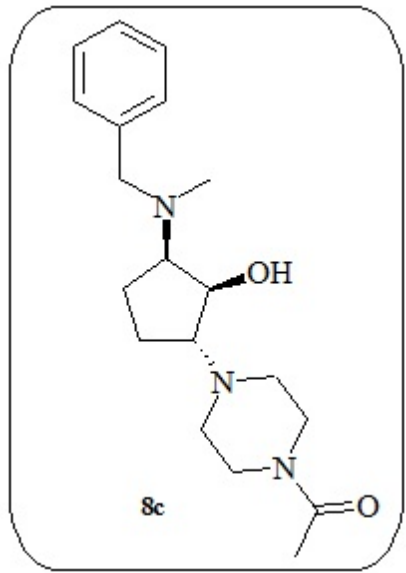

| Параметр                  | Значение |
|---------------------------|----------|
| 1 Origin                  | Varian   |
| 2 Spectrometer            | mercury  |
| 3 Author                  | vnmr1    |
| 4 Solvent                 | DMSO     |
| 5 Temperature             | 50.0     |
| 6 Pulse Sequence          | s222     |
| 7 Number of Scans         | 1        |
| 8 Receiver Gain           | 4        |
| 9 Relaxation Delay        | 3.0000   |
| 10 Pulse Width            | 0.0000   |
| 11 Acquisition Time       | 1.4000   |
| 12 Gradient Duration      | 0.0020   |
| 13 Spectrometer Frequency | 400.46   |
| 14 Spectral Width         | 6535.9   |
| 15 Lowest Frequency       | -376.9   |
| 16 Nucleus                | 1H       |
| 17 Acquired Size          | 9150     |
| 18 Spectral Size          | 32768    |

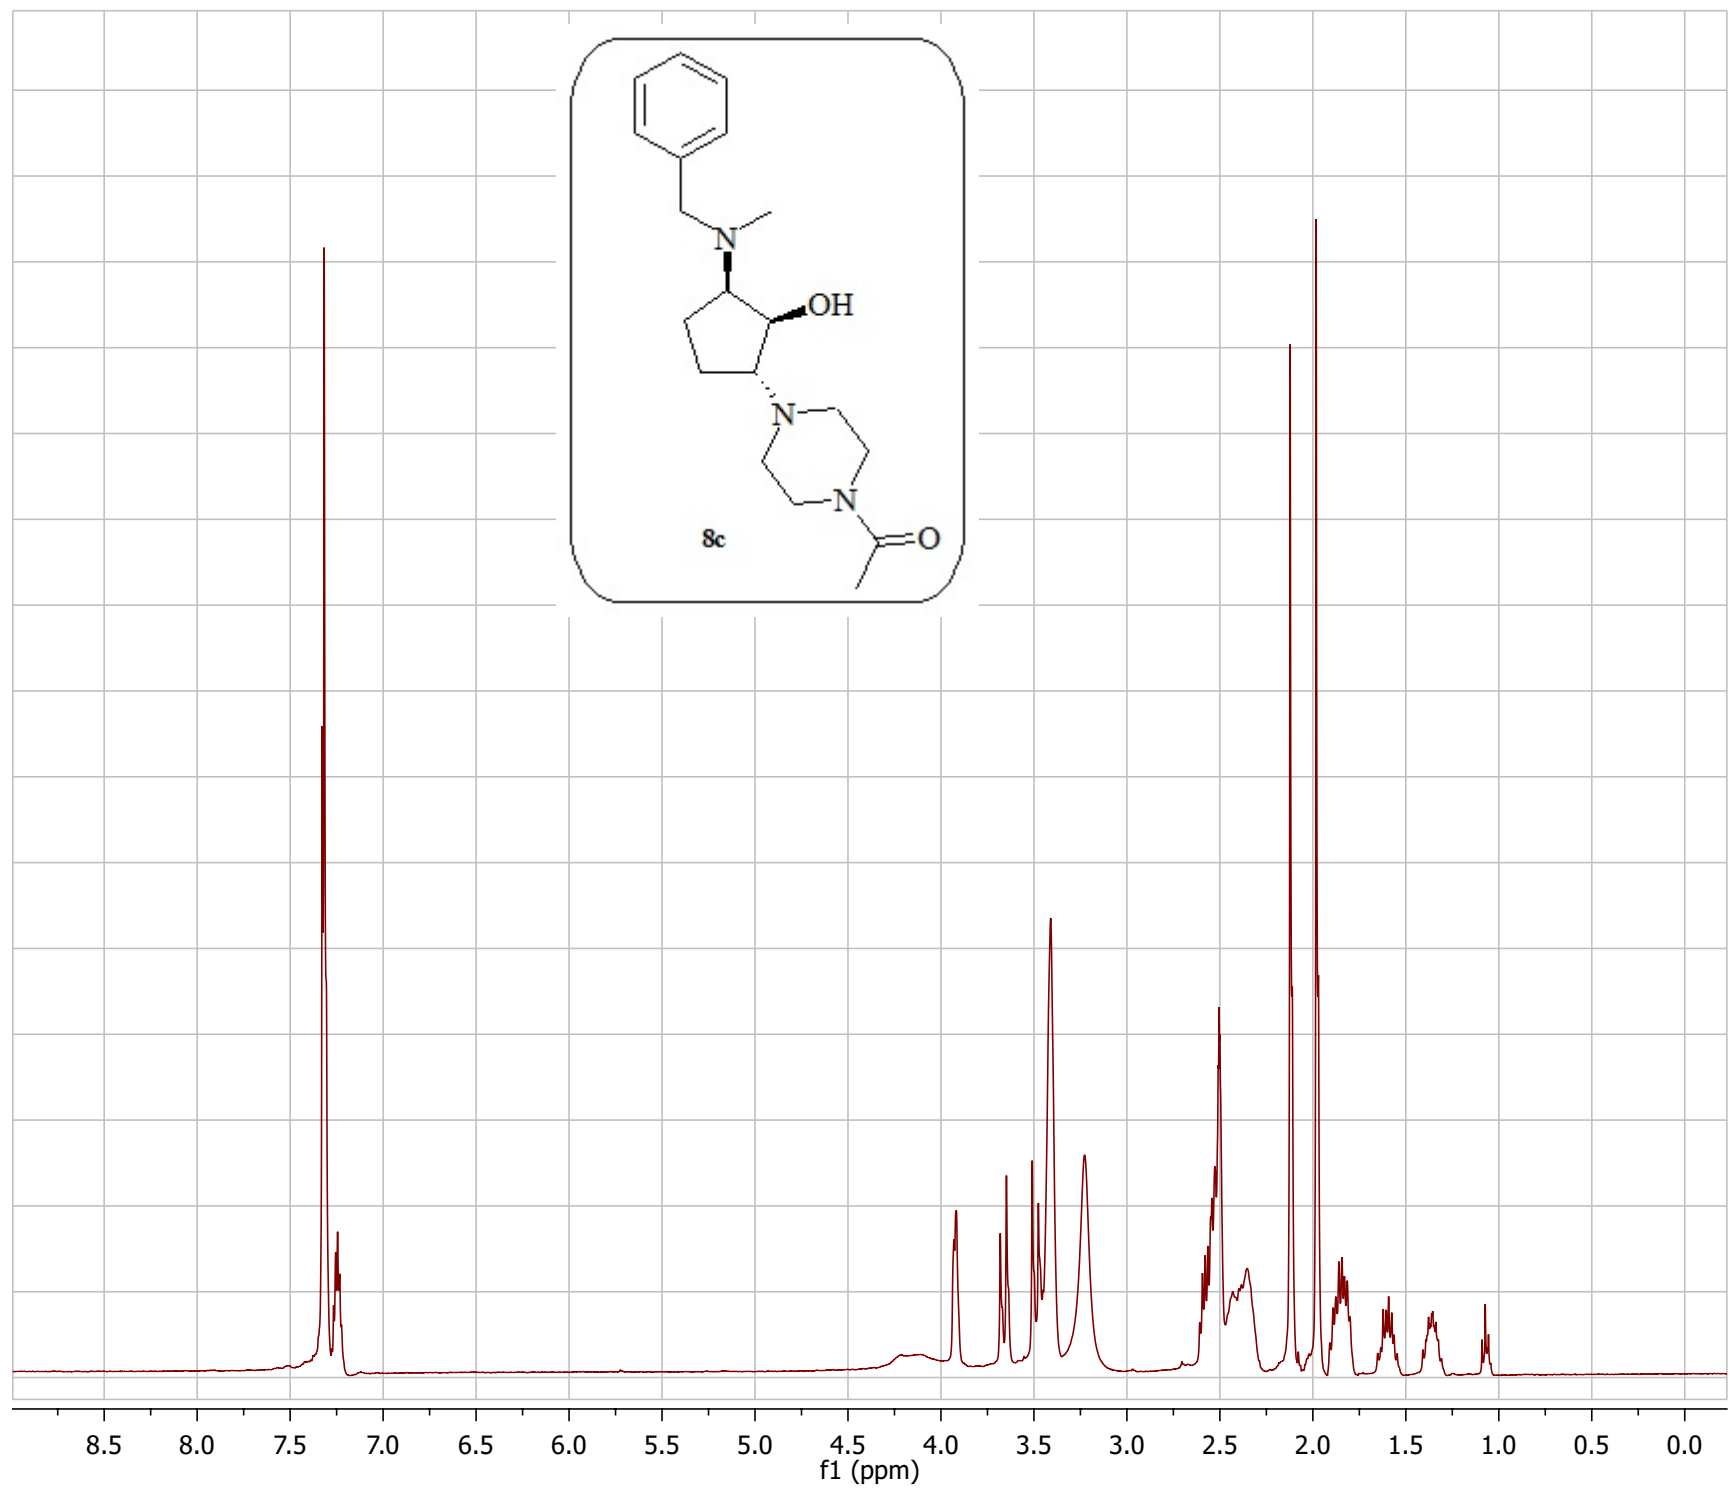

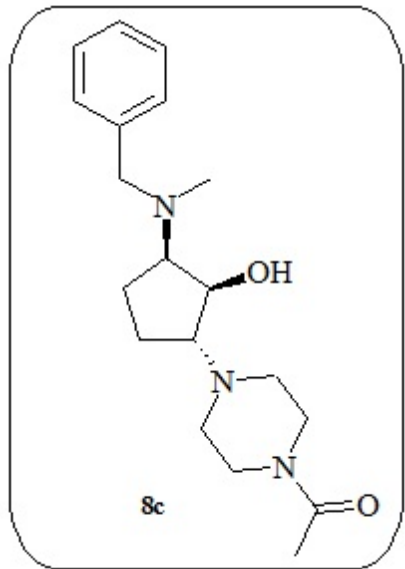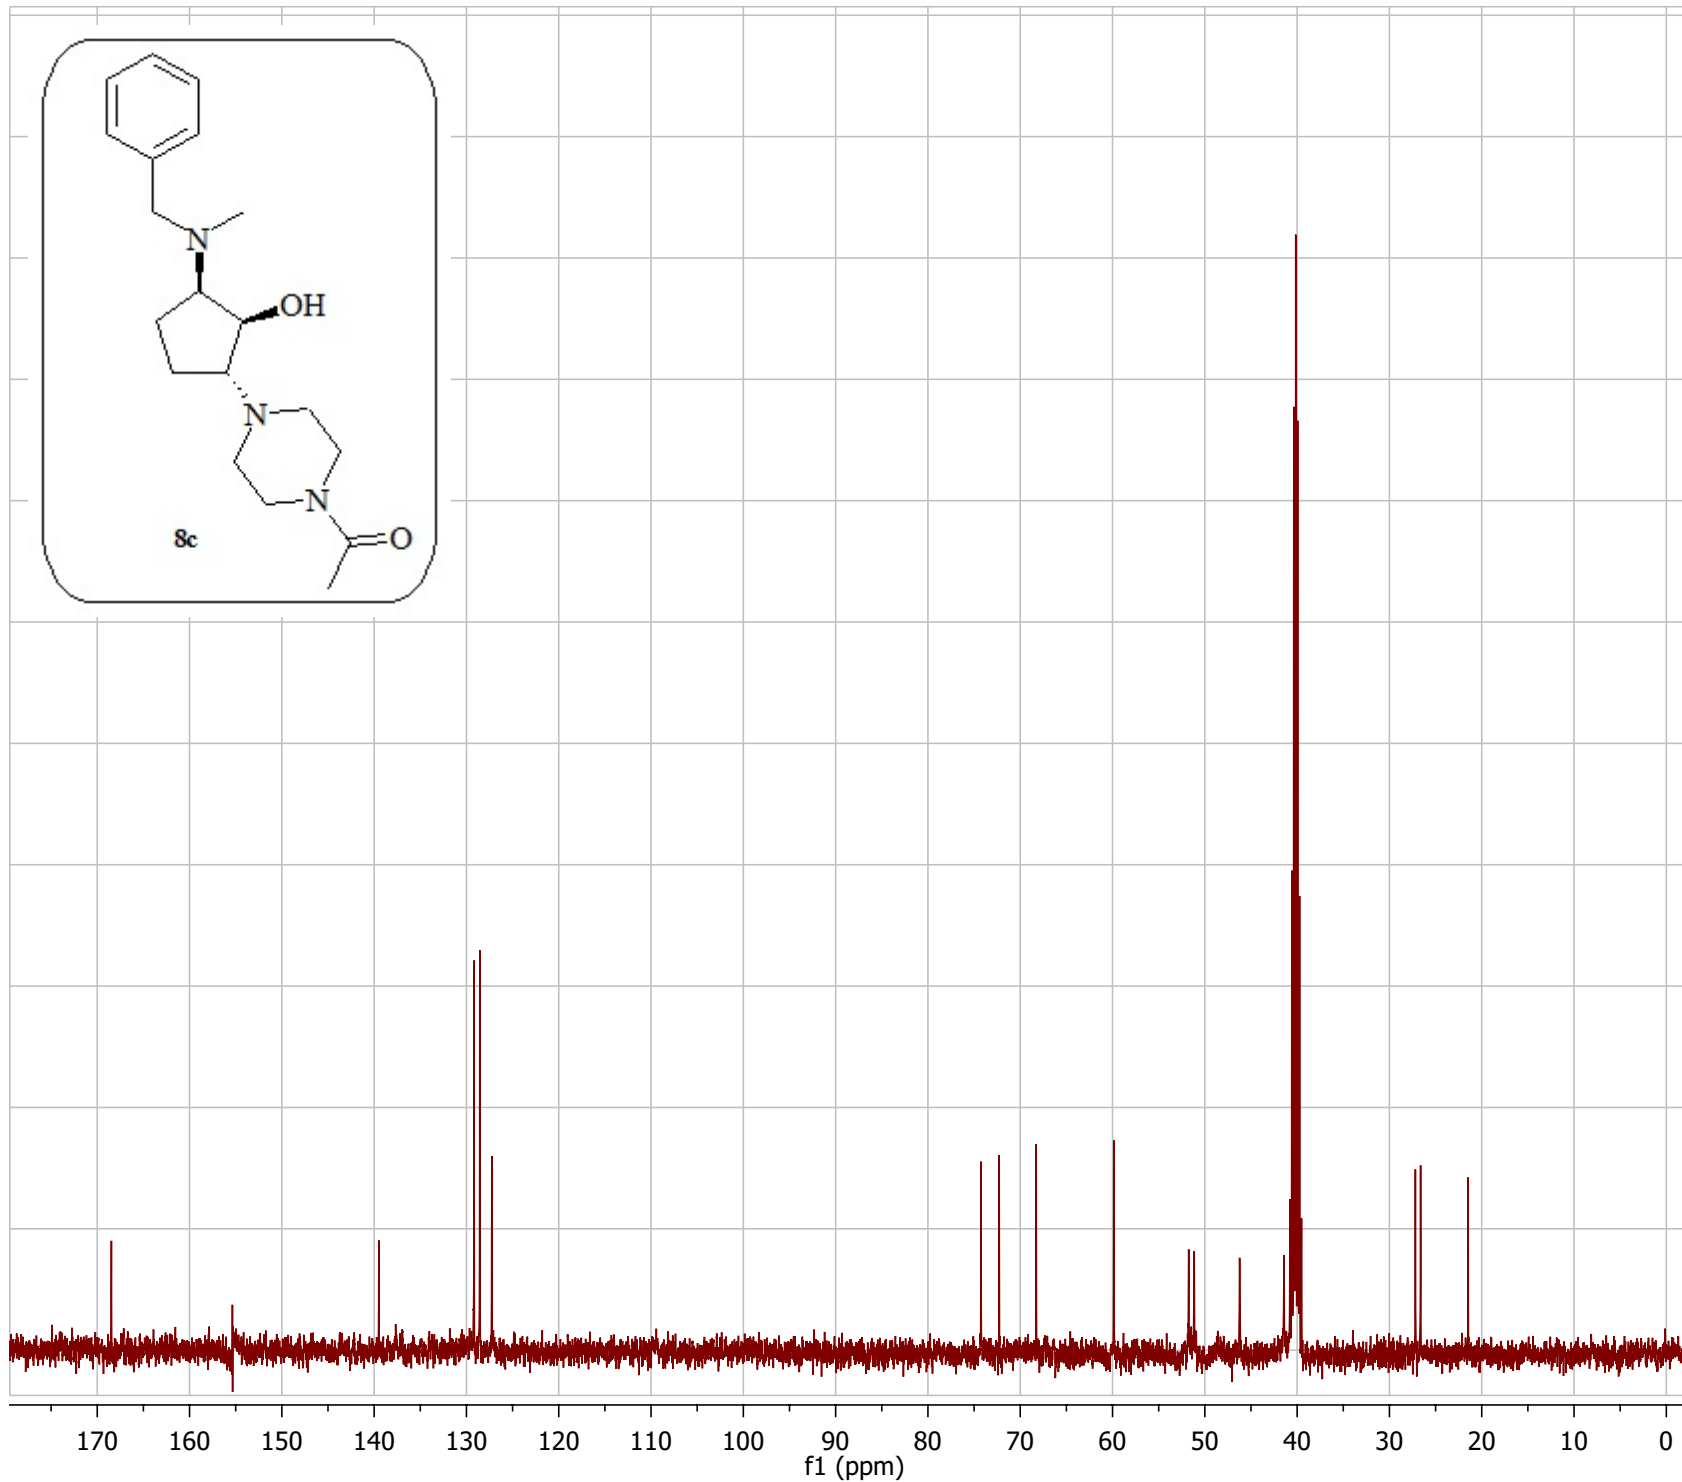

| Параметр                  | Значение |
|---------------------------|----------|
| 1 Origin                  | Varian   |
| 2 Spectrometer            | mercury  |
| 3 Author                  | vnmr1    |
| 4 Solvent                 | dms0     |
| 5 Temperature             | 50.0     |
| 6 Pulse Sequence          | s2pul    |
| 7 Number of Scans         | 256      |
| 8 Receiver Gain           | 38       |
| 9 Relaxation Delay        | 3.0000   |
| 10 Pulse Width            | 0.0000   |
| 11 Acquisition Time       | 2.4448   |
| 12 Gradient Duration      | 0.0020   |
| 13 Spectrometer Frequency | 100.71   |
| 14 Spectral Width         | 26178.0  |
| 15 Lowest Frequency       | -1020.9  |
| 16 Nucleus                | 13C      |
| 17 Acquired Size          | 64000    |
| 18 Spectral Size          | 131072   |

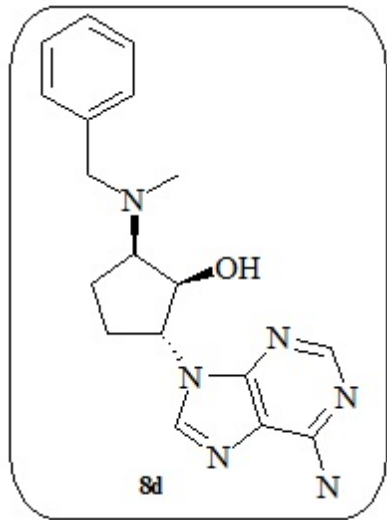

| Параметр                  | Значение |
|---------------------------|----------|
| 1 Origin                  | Varian   |
| 2 Spectrometer            | mercury  |
| 3 Author                  | vnmr1    |
| 4 Solvent                 | DMSO     |
| 5 Temperature             | 50.0     |
| 6 Pulse Sequence          | s2pul    |
| 7 Number of Scans         | 4        |
| 8 Receiver Gain           | 8        |
| 9 Relaxation Delay        | 3.0000   |
| 10 Pulse Width            | 0.0000   |
| 11 Acquisition Time       | 1.3982   |
| 12 Gradient Duration      | 0.0020   |
| 13 Spectrometer Frequency | 400.45   |
| 14 Spectral Width         | 3064.7   |
| 15 Lowest Frequency       | 327.9    |
| 16 Nucleus                | 1H       |
| 17 Acquired Size          | 4285     |
| 18 Spectral Size          | 16384    |

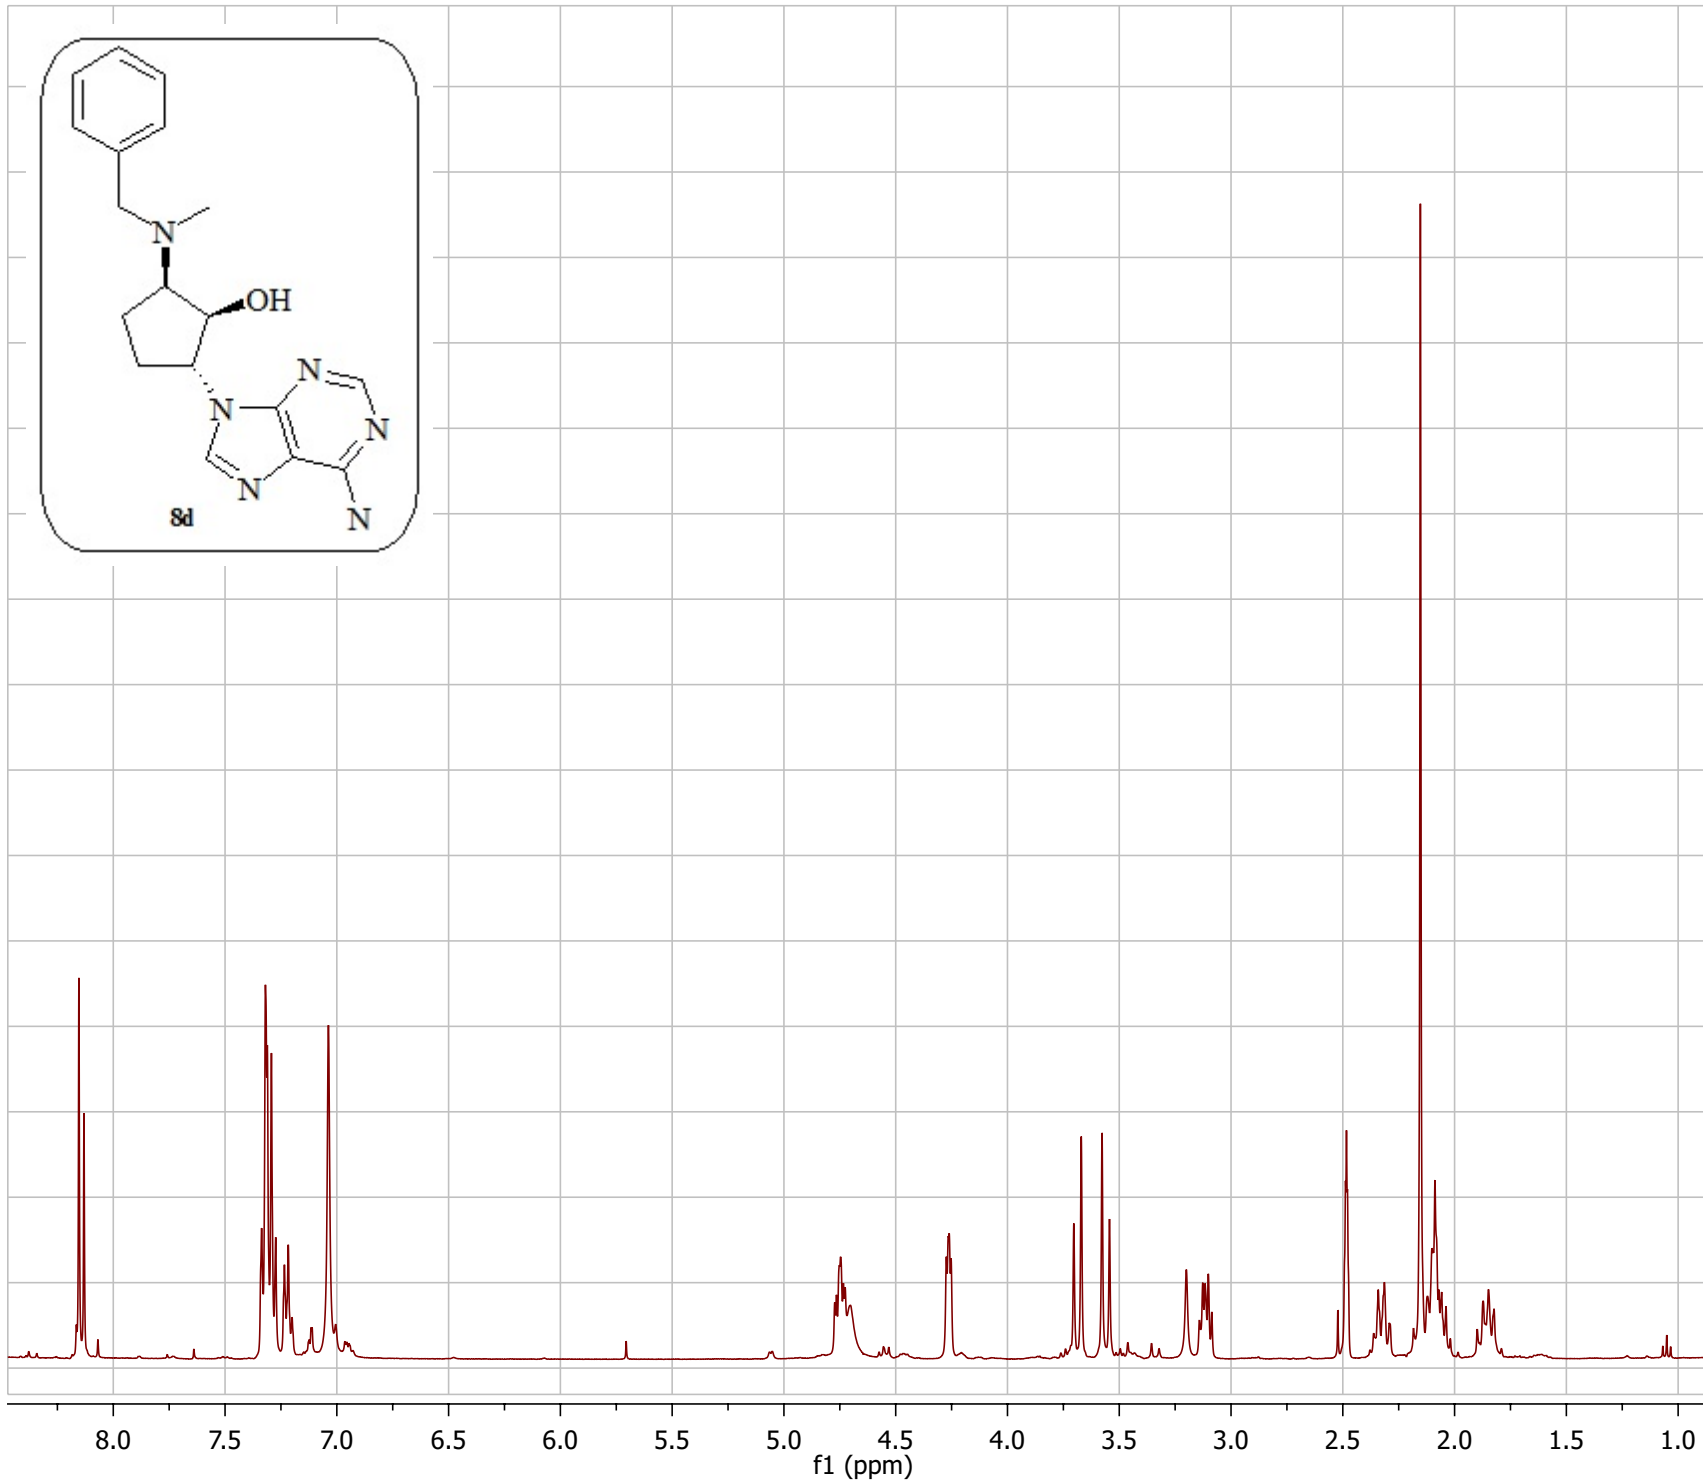

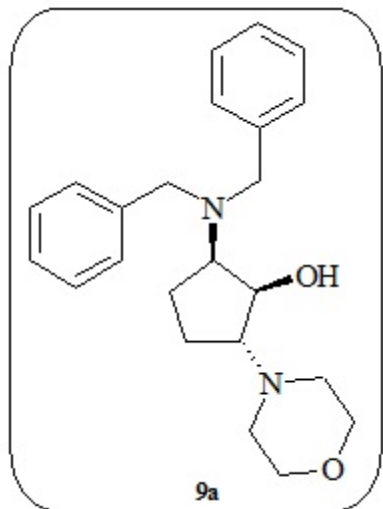

| Параметр                  | Значение       |
|---------------------------|----------------|
| 1 Origin                  | Varian         |
| 2 Spectrometer            | mercury        |
| 3 Author                  | vnmr1          |
| 4 Solvent                 | DMSO           |
| 5 Temperature             | 50.0           |
| 6 Pulse Sequence          | s2pul          |
| 7 Number of Scans         | 16             |
| 8 Receiver Gain           | 8              |
| 9 Relaxation Delay        | 3.0000         |
| 10 Pulse Width            | 0.0000         |
| 11 Acquisition Time       | 2.4998         |
| 12 Gradient Duration      | 0.0020         |
| 13 Spectrometer Frequency | 400.45         |
| 14 Spectral Width         | 2777.8         |
| 15 Lowest Frequency       | 318.3          |
| 16 Nucleus                | <sup>1</sup> H |
| 17 Acquired Size          | 6944           |
| 18 Spectral Size          | 16384          |

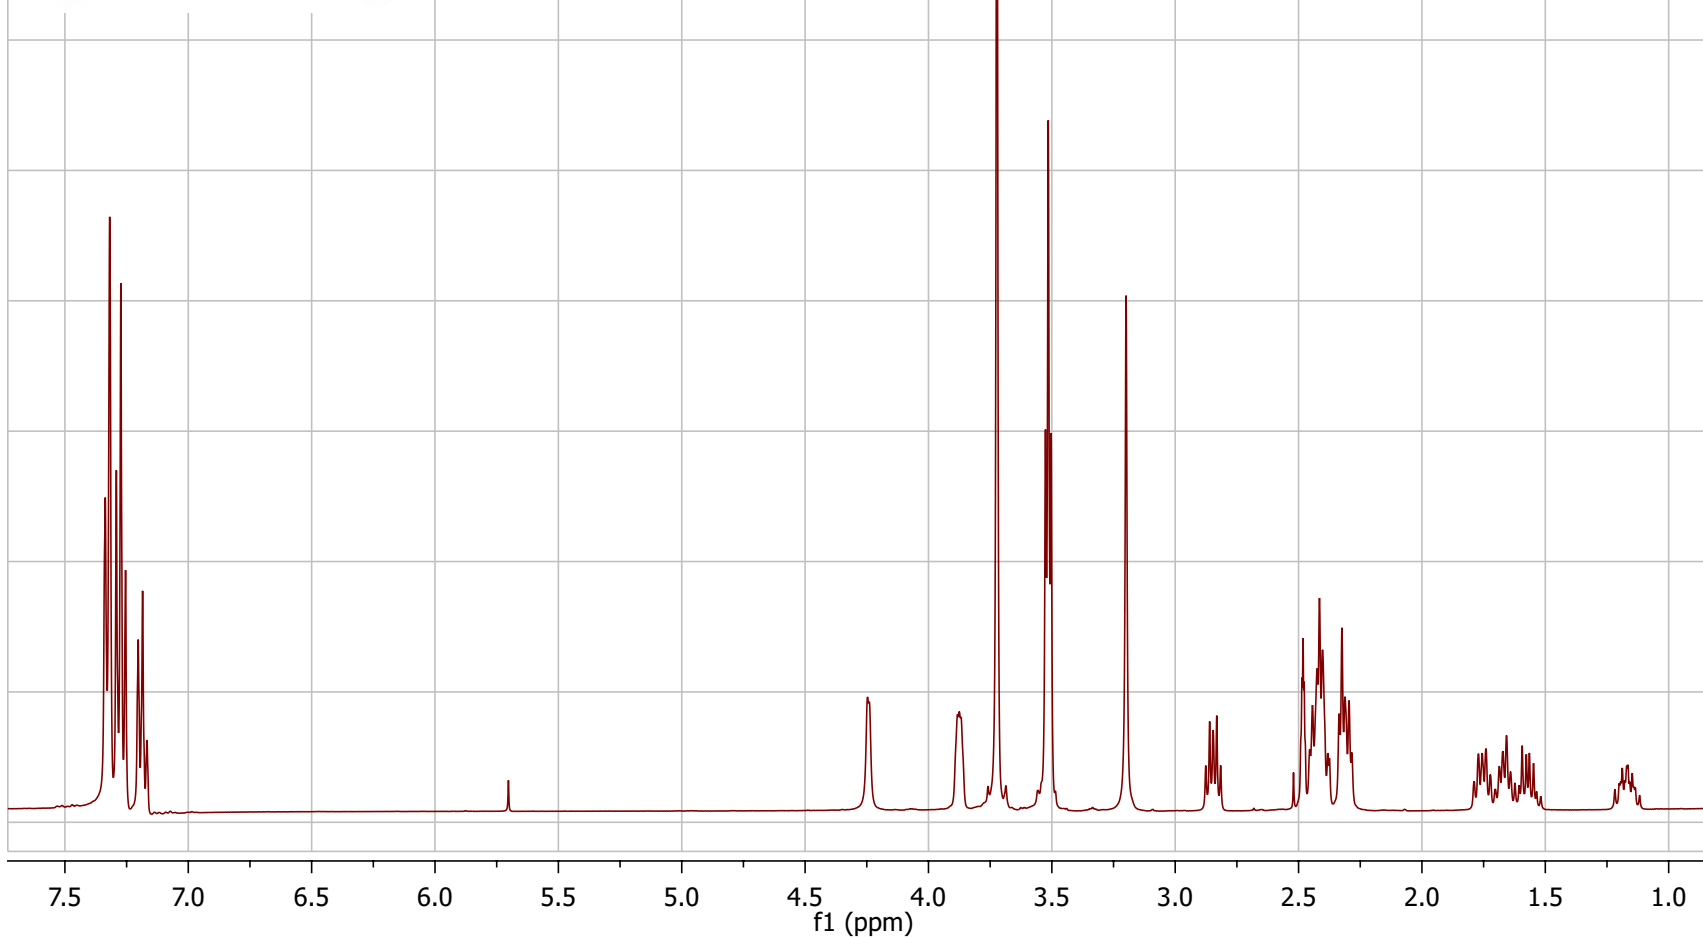

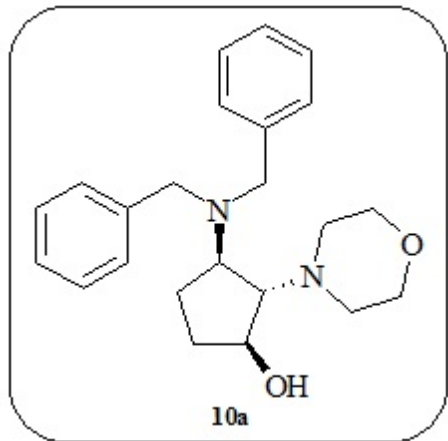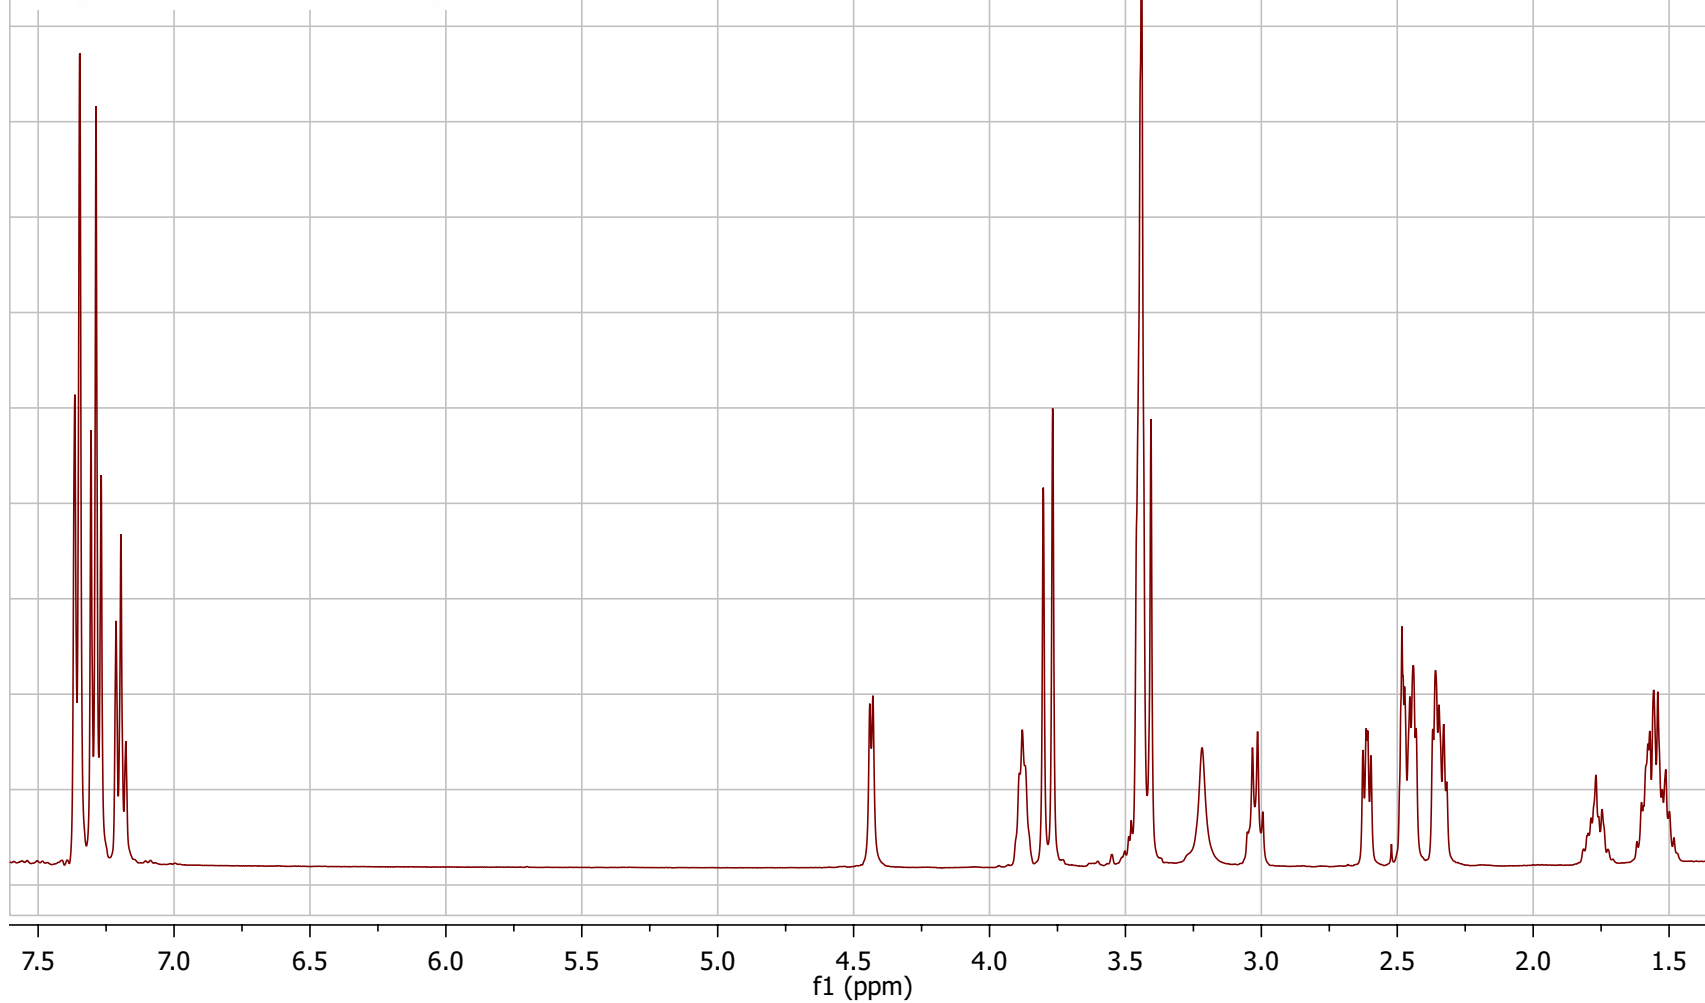

| Параметр                  | Значение |
|---------------------------|----------|
| 1 Origin                  | Varian   |
| 2 Spectrometer            | mercury  |
| 3 Author                  | vnmr1    |
| 4 Solvent                 | DMSO     |
| 5 Temperature             | 50.0     |
| 6 Pulse Sequence          | s2pul    |
| 7 Number of Scans         | 4        |
| 8 Receiver Gain           | 4        |
| 9 Relaxation Delay        | 3.0000   |
| 10 Pulse Width            | 0.0000   |
| 11 Acquisition Time       | 1.4003   |
| 12 Gradient Duration      | 0.0020   |
| 13 Spectrometer Frequency | 400.45   |
| 14 Spectral Width         | 2513.8   |
| 15 Lowest Frequency       | 531.3    |
| 16 Nucleus                | 1H       |
| 17 Acquired Size          | 3520     |
| 18 Spectral Size          | 8192     |



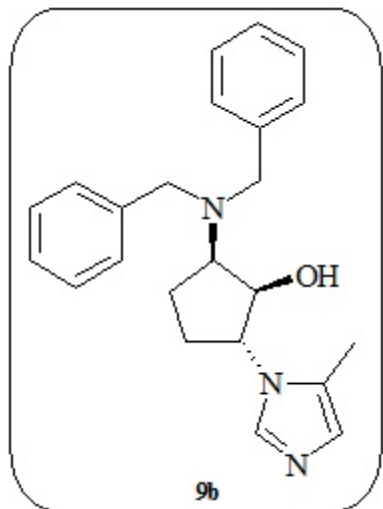

| Параметр                  | Значение       |
|---------------------------|----------------|
| 1 Origin                  | Varian         |
| 2 Spectrometer            | mercury        |
| 3 Author                  | vnmr1          |
| 4 Solvent                 | DMSO           |
| 5 Temperature             | 50.0           |
| 6 Pulse Sequence          | s222           |
| 7 Number of Scans         | 1              |
| 8 Receiver Gain           | 4              |
| 9 Relaxation Delay        | 3.0000         |
| 10 Pulse Width            | 0.0000         |
| 11 Acquisition Time       | 1.4000         |
| 12 Gradient Duration      | 0.0020         |
| 13 Spectrometer Frequency | 400.46         |
| 14 Spectral Width         | 6535.9         |
| 15 Lowest Frequency       | -376.1         |
| 16 Nucleus                | <sup>1</sup> H |
| 17 Acquired Size          | 9150           |
| 18 Spectral Size          | 32768          |

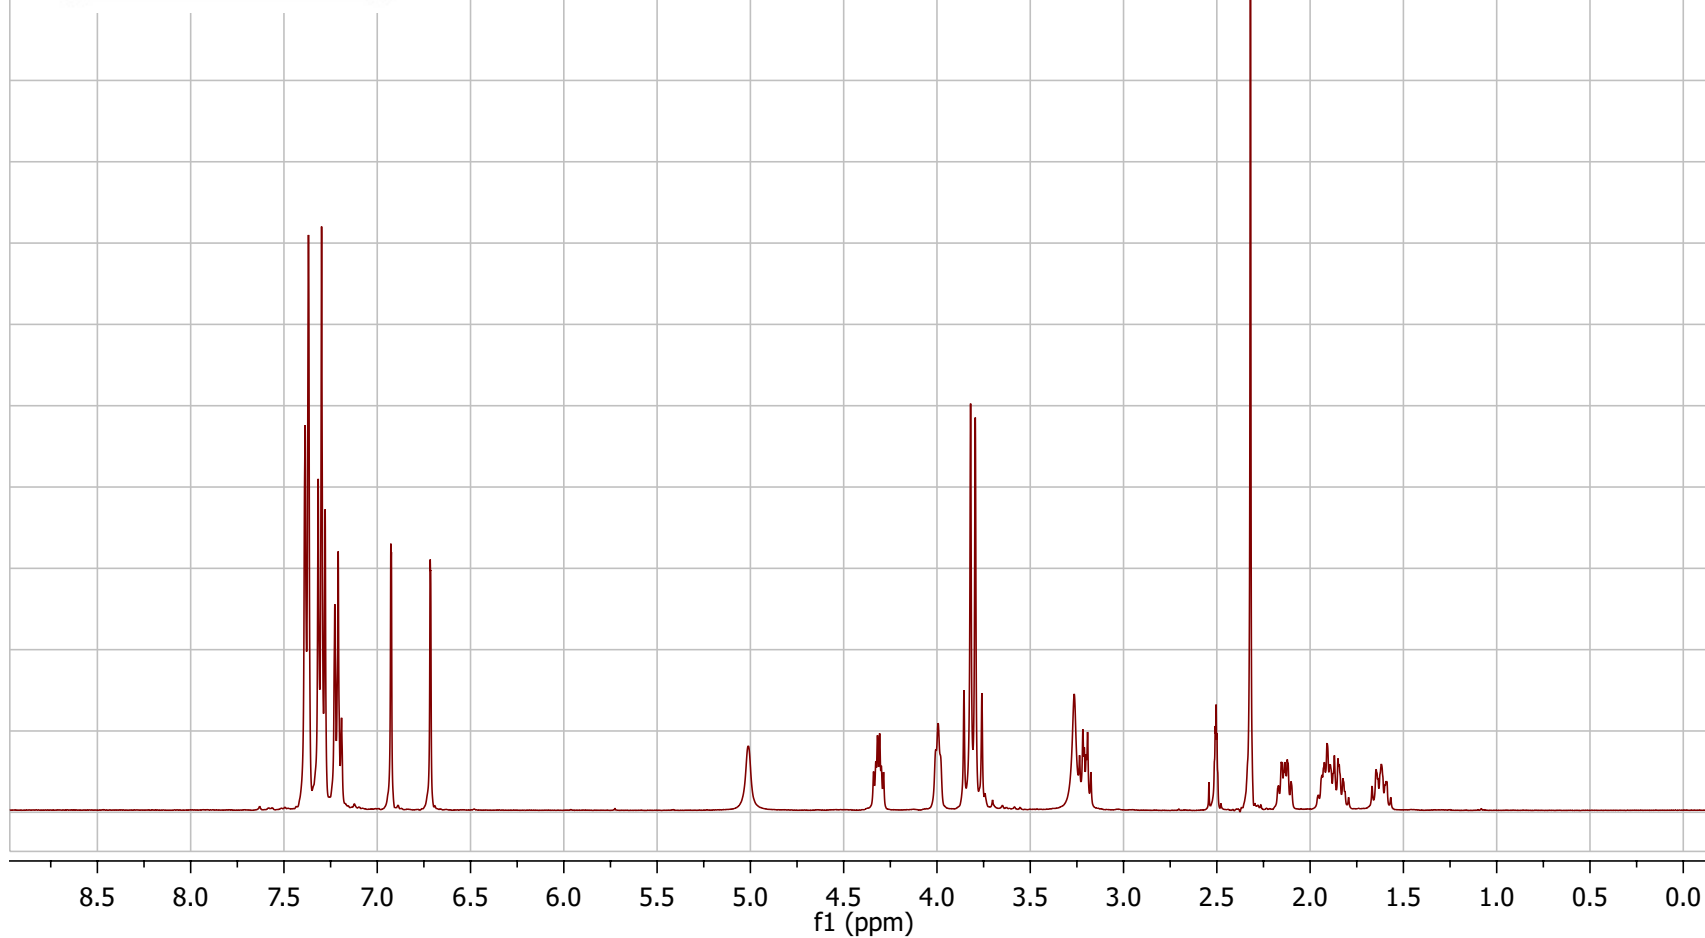

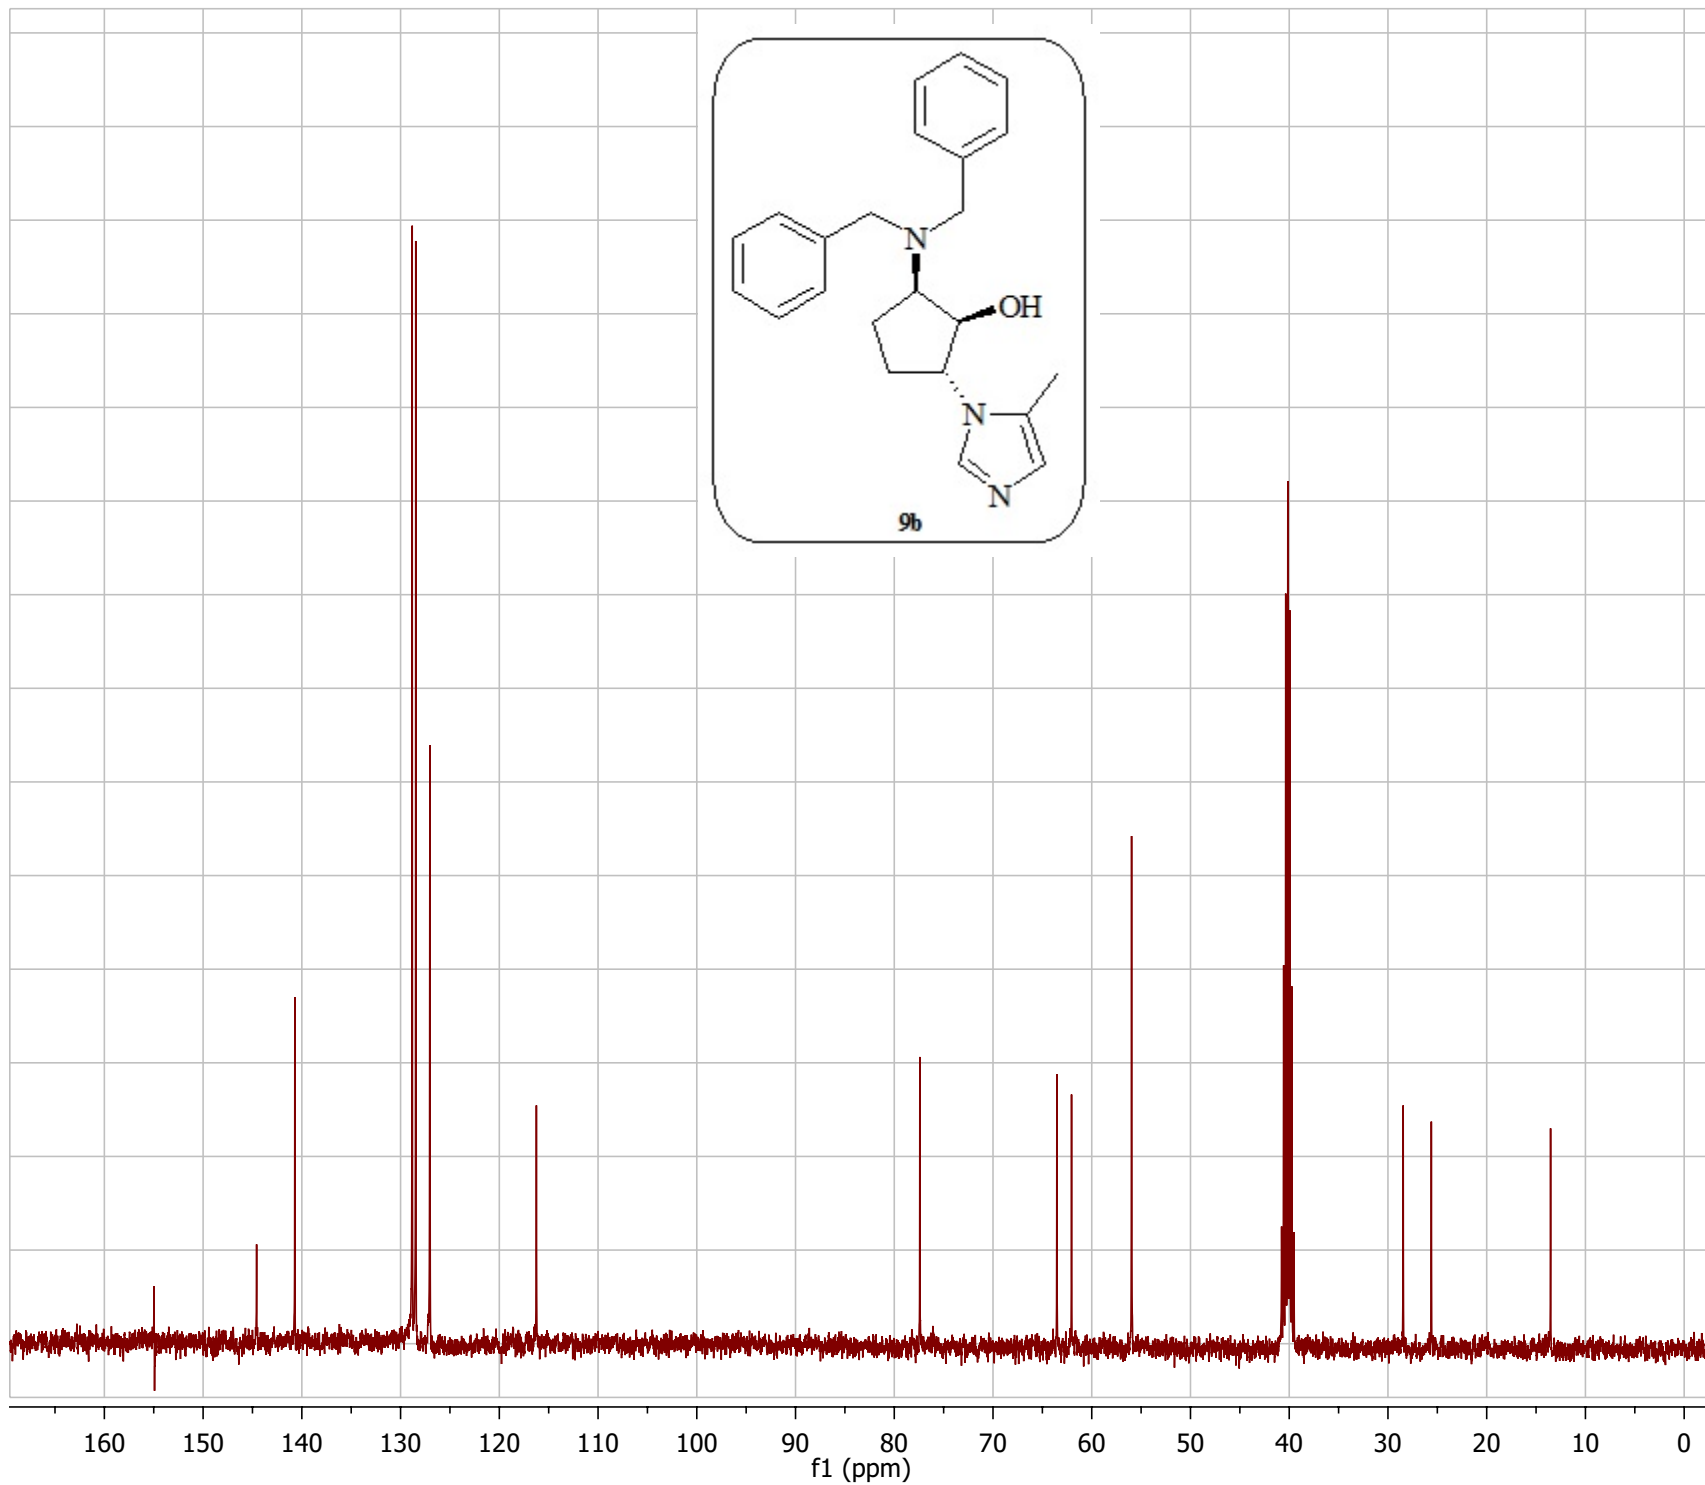

| Параметр                  | Значение |
|---------------------------|----------|
| 1 Origin                  | Varian   |
| 2 Spectrometer            | mercury  |
| 3 Author                  | vnmr1    |
| 4 Solvent                 | dms0     |
| 5 Temperature             | 50.0     |
| 6 Pulse Sequence          | s2pul    |
| 7 Number of Scans         | 256      |
| 8 Receiver Gain           | 38       |
| 9 Relaxation Delay        | 3.0000   |
| 10 Pulse Width            | 0.0000   |
| 11 Acquisition Time       | 2.4448   |
| 12 Gradient Duration      | 0.0020   |
| 13 Spectrometer Frequency | 100.71   |
| 14 Spectral Width         | 26178.0  |
| 15 Lowest Frequency       | -1022.5  |
| 16 Nucleus                | 13C      |
| 17 Acquired Size          | 64000    |
| 18 Spectral Size          | 131072   |

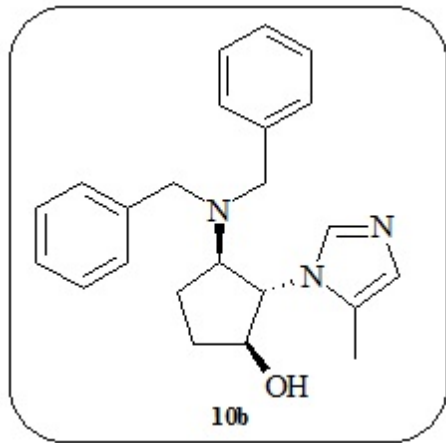

| Параметр                  | Значение       |
|---------------------------|----------------|
| 1 Origin                  | Varian         |
| 2 Spectrometer            | mercury        |
| 3 Author                  | vnmr1          |
| 4 Solvent                 | DMSO           |
| 5 Temperature             | 50.0           |
| 6 Pulse Sequence          | s2pul          |
| 7 Number of Scans         | 16             |
| 8 Receiver Gain           | 4              |
| 9 Relaxation Delay        | 3.0000         |
| 10 Pulse Width            | 0.0000         |
| 11 Acquisition Time       | 2.5002         |
| 12 Gradient Duration      | 0.0020         |
| 13 Spectrometer Frequency | 400.45         |
| 14 Spectral Width         | 2513.8         |
| 15 Lowest Frequency       | 535.7          |
| 16 Nucleus                | <sup>1</sup> H |
| 17 Acquired Size          | 6285           |
| 18 Spectral Size          | 16384          |

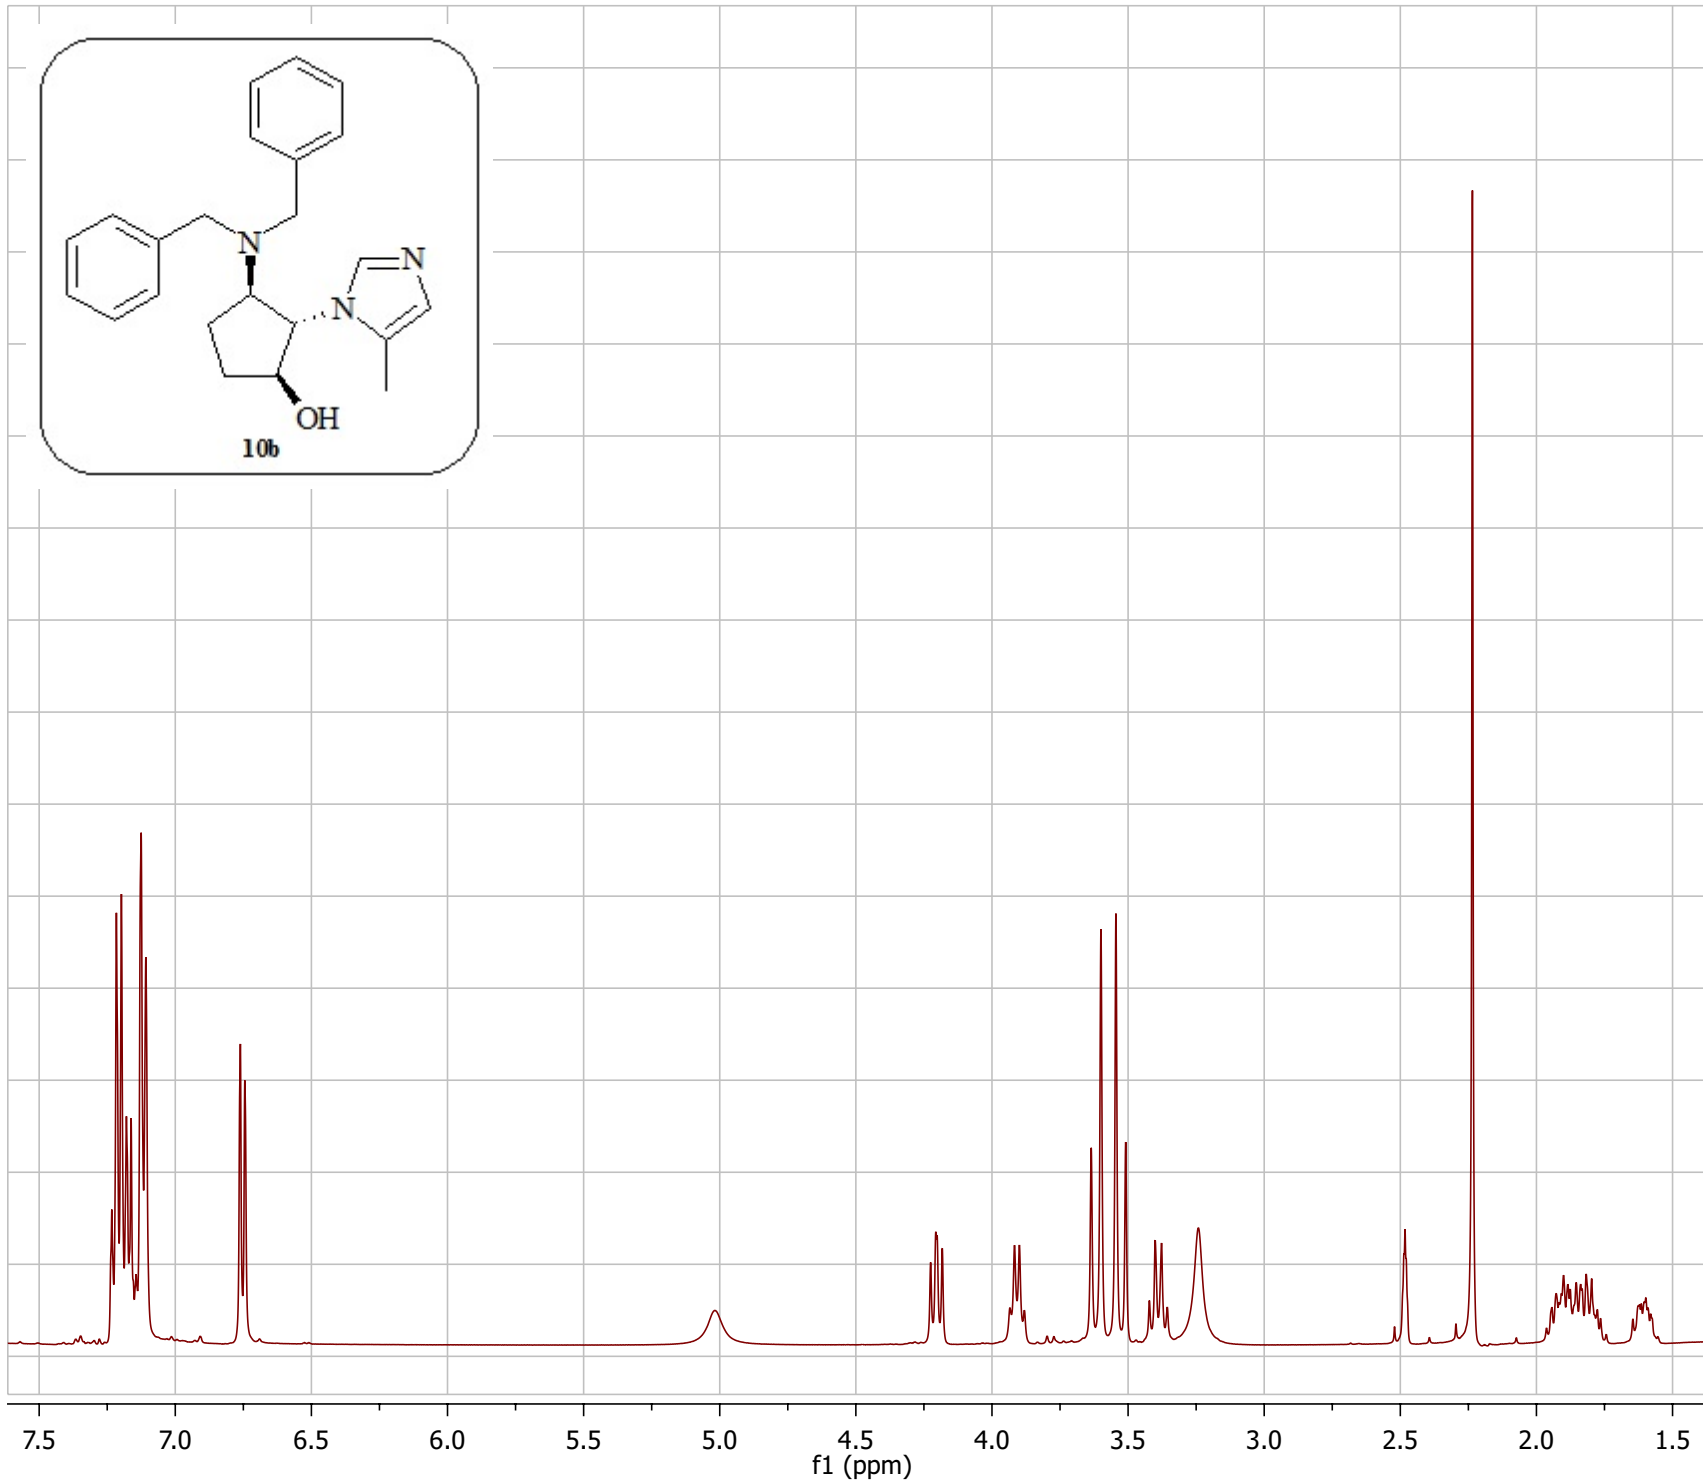

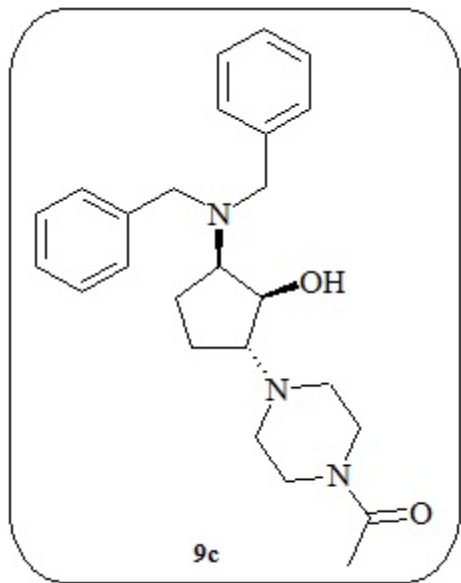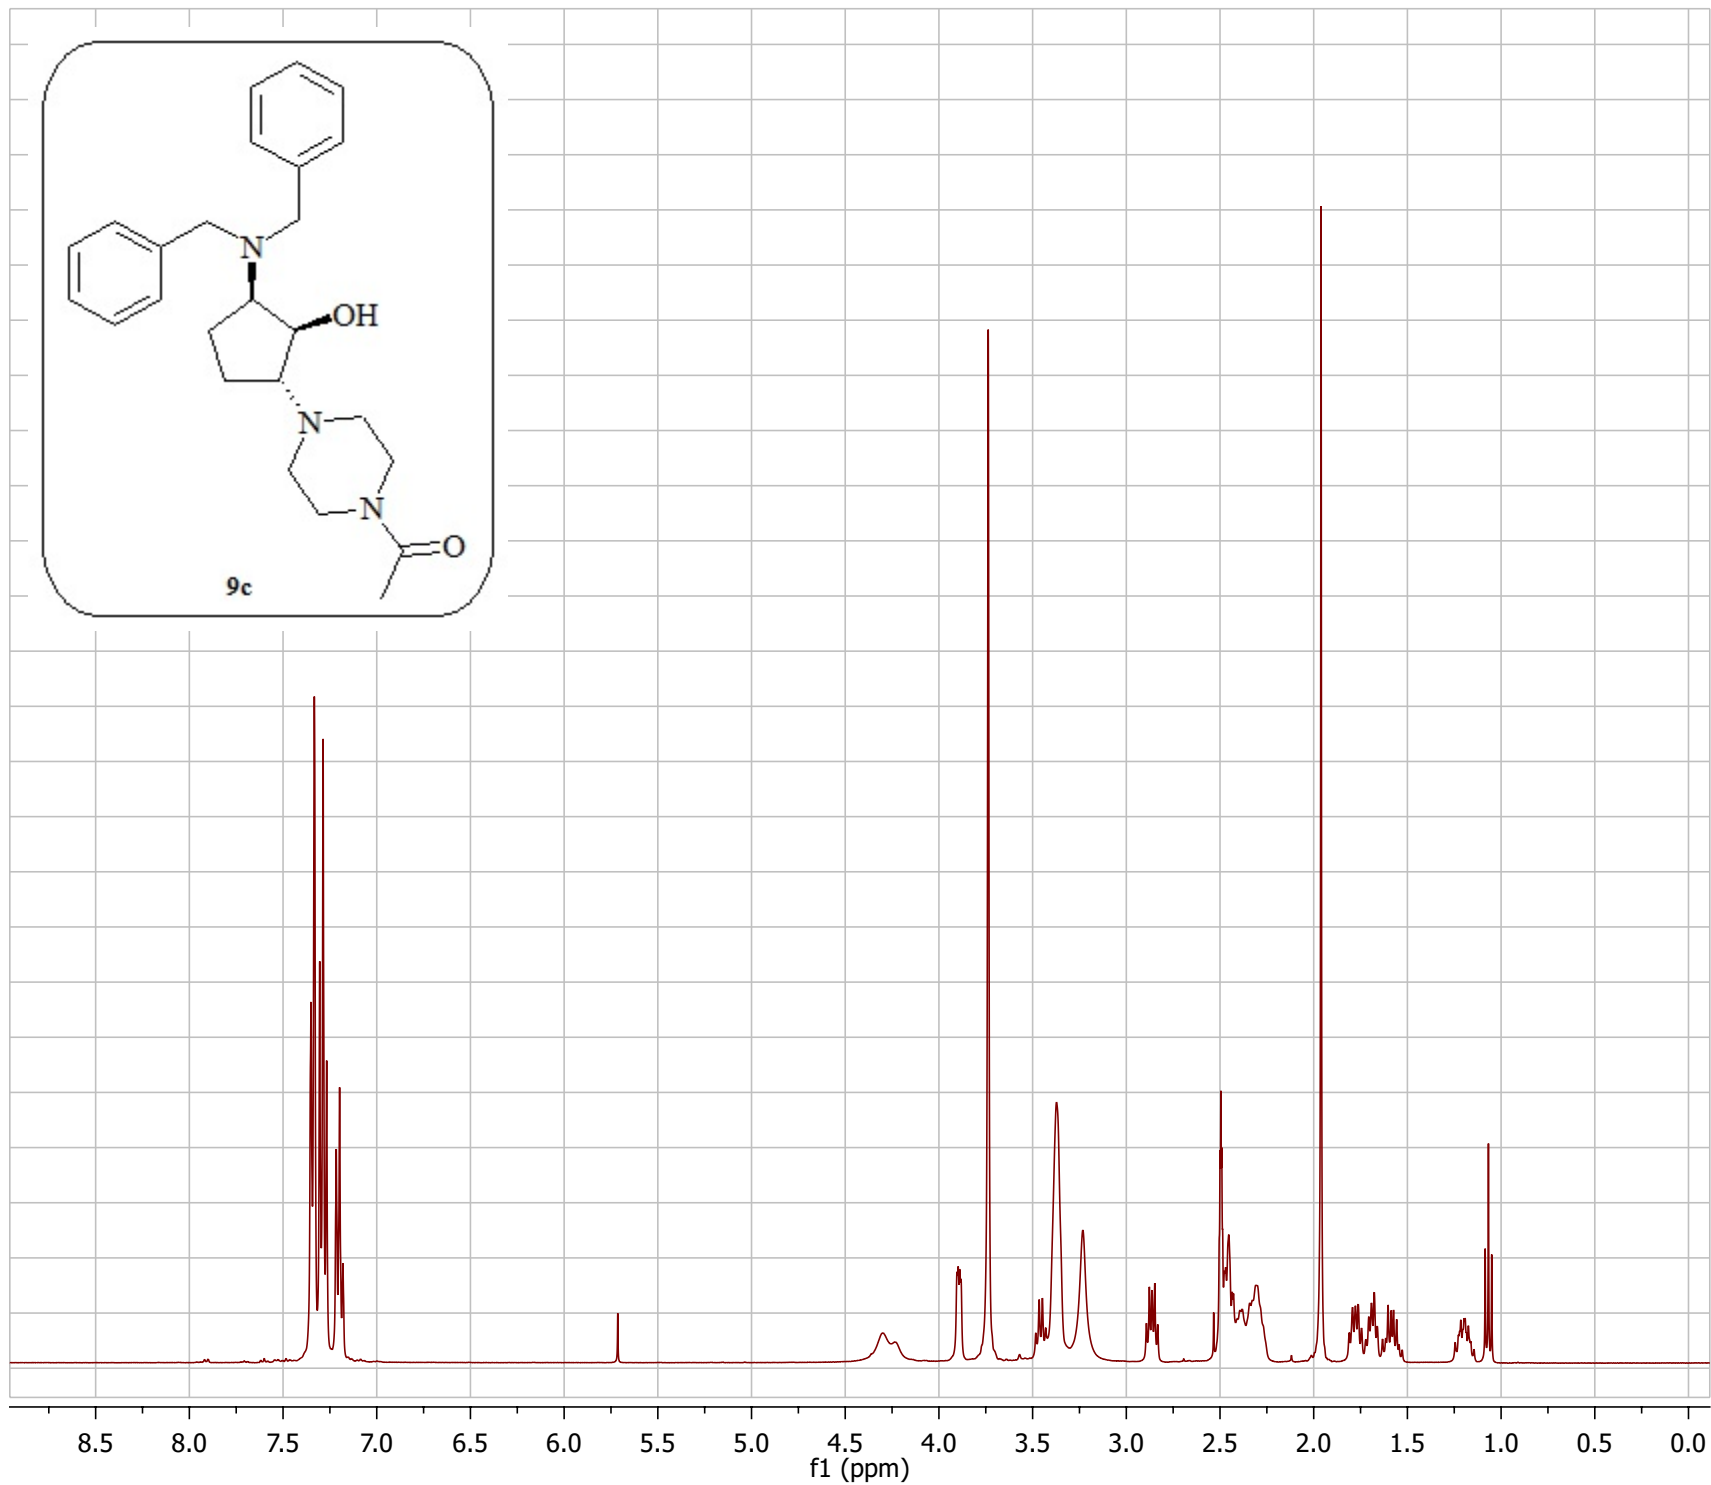

| Параметр                  | Значение |
|---------------------------|----------|
| 1 Origin                  | Varian   |
| 2 Spectrometer            | mercury  |
| 3 Author                  | vnmr1    |
| 4 Solvent                 | DMSO     |
| 5 Temperature             | 50.0     |
| 6 Pulse Sequence          | s222     |
| 7 Number of Scans         | 4        |
| 8 Receiver Gain           | 8        |
| 9 Relaxation Delay        | 3.0000   |
| 10 Pulse Width            | 0.0000   |
| 11 Acquisition Time       | 1.4000   |
| 12 Gradient Duration      | 0.0020   |
| 13 Spectrometer Frequency | 400.46   |
| 14 Spectral Width         | 6535.9   |
| 15 Lowest Frequency       | -379.8   |
| 16 Nucleus                | 1H       |
| 17 Acquired Size          | 9150     |
| 18 Spectral Size          | 32768    |

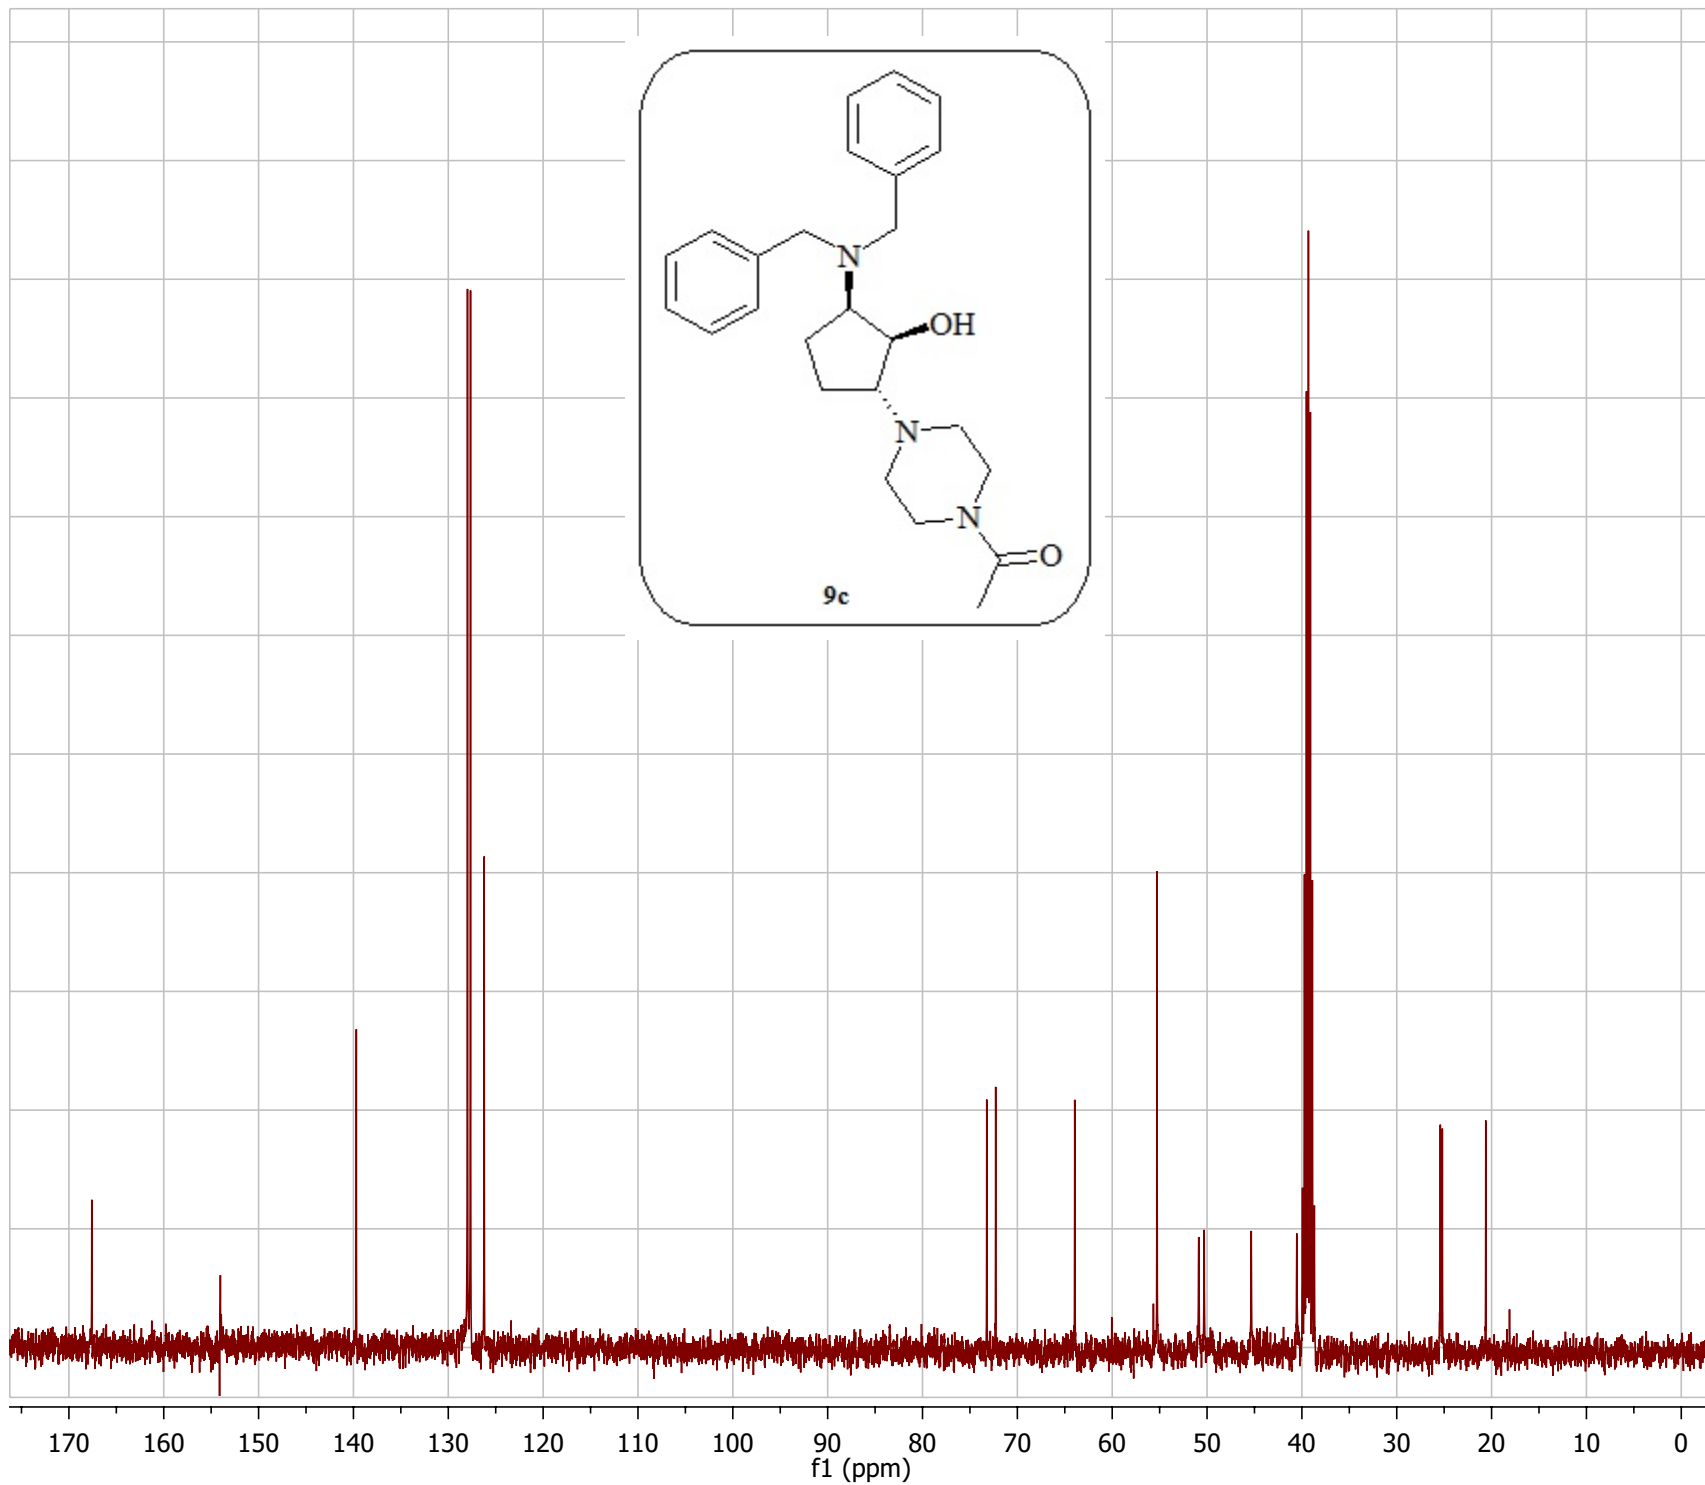

| Параметр                  | Значение |
|---------------------------|----------|
| 1 Origin                  | Varian   |
| 2 Spectrometer            | mercury  |
| 3 Author                  | vnmr1    |
| 4 Solvent                 | dms0     |
| 5 Temperature             | 50.0     |
| 6 Pulse Sequence          | s2pul    |
| 7 Number of Scans         | 256      |
| 8 Receiver Gain           | 38       |
| 9 Relaxation Delay        | 3.0000   |
| 10 Pulse Width            | 0.0000   |
| 11 Acquisition Time       | 2.4448   |
| 12 Gradient Duration      | 0.0020   |
| 13 Spectrometer Frequency | 100.71   |
| 14 Spectral Width         | 26178.0  |
| 15 Lowest Frequency       | -1106.4  |
| 16 Nucleus                | 13C      |
| 17 Acquired Size          | 64000    |
| 18 Spectral Size          | 131072   |

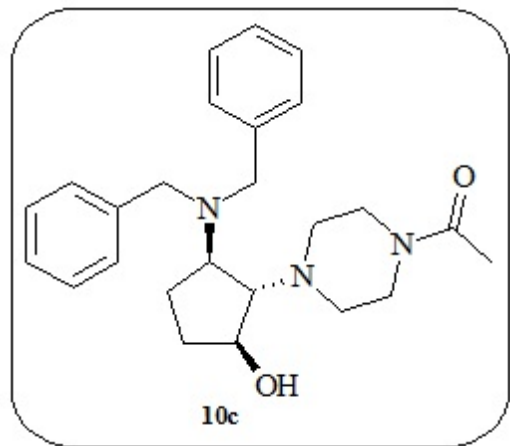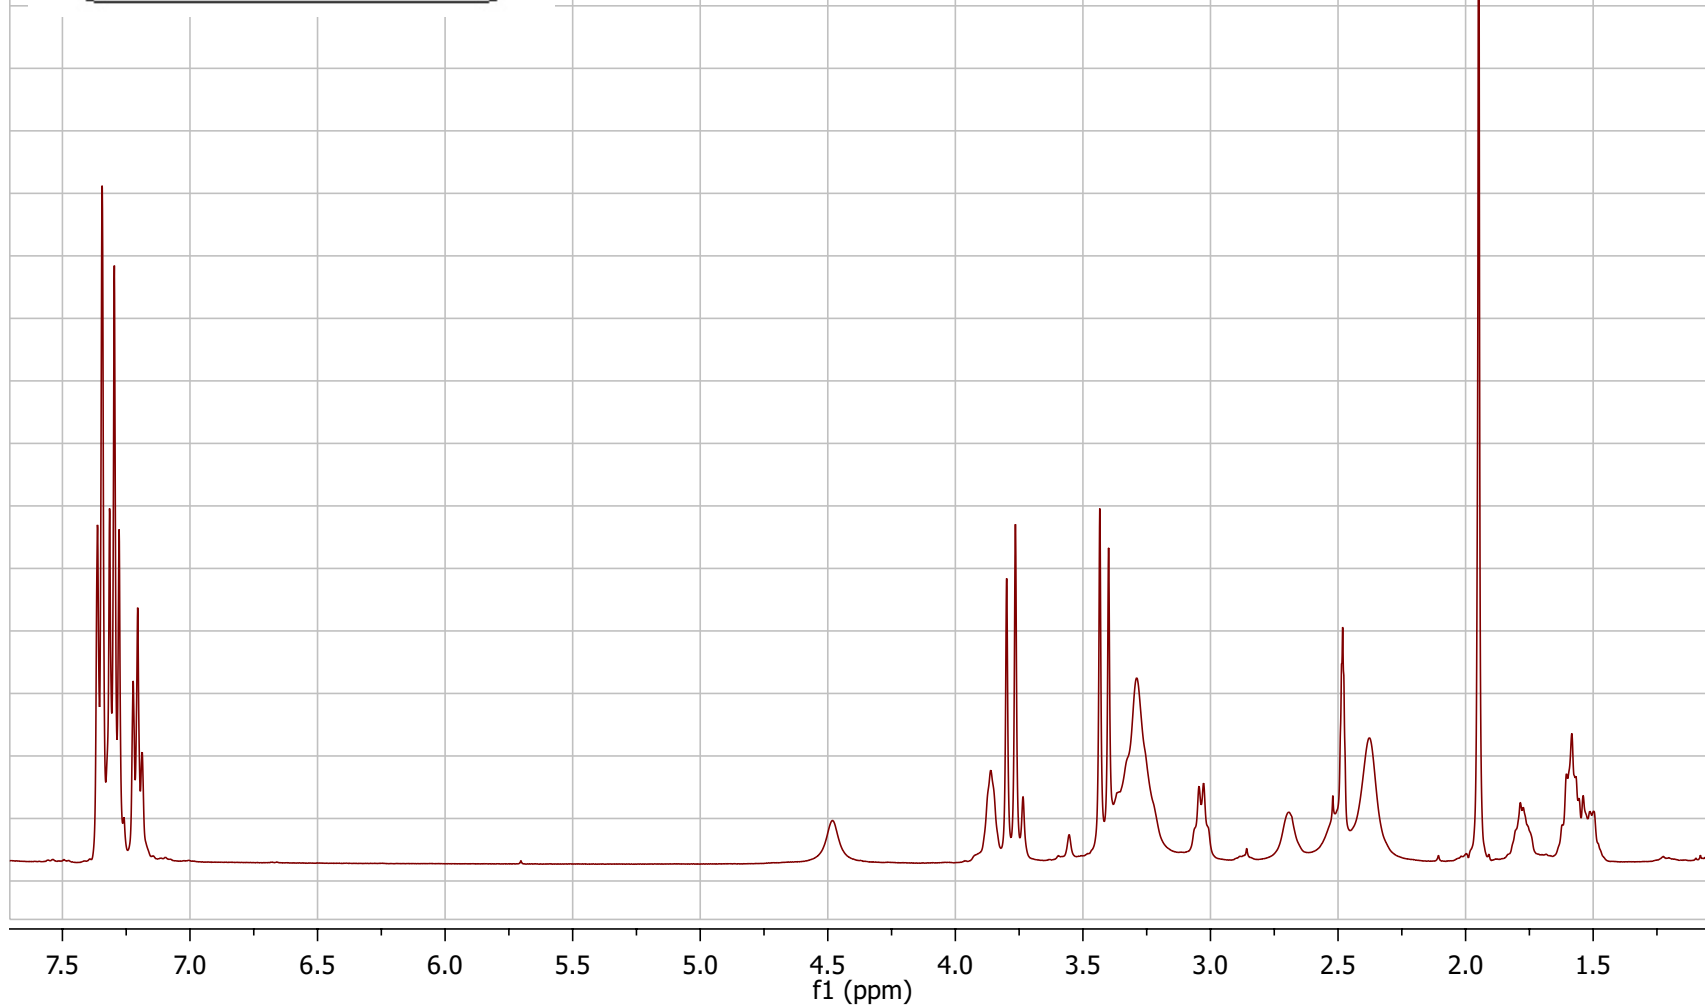

| Параметр                  | Значение |
|---------------------------|----------|
| 1 Origin                  | Varian   |
| 2 Spectrometer            | mercury  |
| 3 Author                  | vnmr1    |
| 4 Solvent                 | DMSO     |
| 5 Temperature             | 50.0     |
| 6 Pulse Sequence          | s2pul    |
| 7 Number of Scans         | 4        |
| 8 Receiver Gain           | 8        |
| 9 Relaxation Delay        | 3.0000   |
| 10 Pulse Width            | 0.0000   |
| 11 Acquisition Time       | 1.3991   |
| 12 Gradient Duration      | 0.0020   |
| 13 Spectrometer Frequency | 400.45   |
| 14 Spectral Width         | 2677.4   |
| 15 Lowest Frequency       | 408.6    |
| 16 Nucleus                | 1H       |
| 17 Acquired Size          | 3746     |
| 18 Spectral Size          | 8192     |

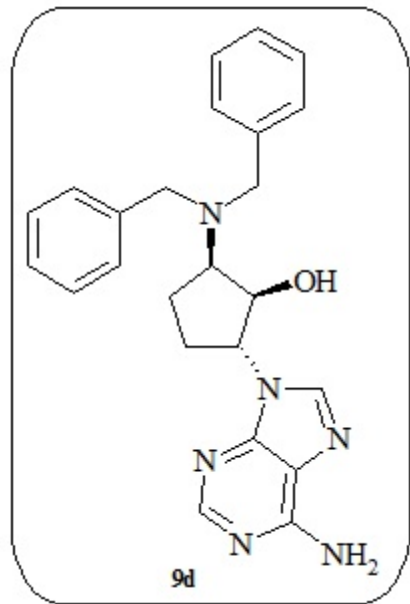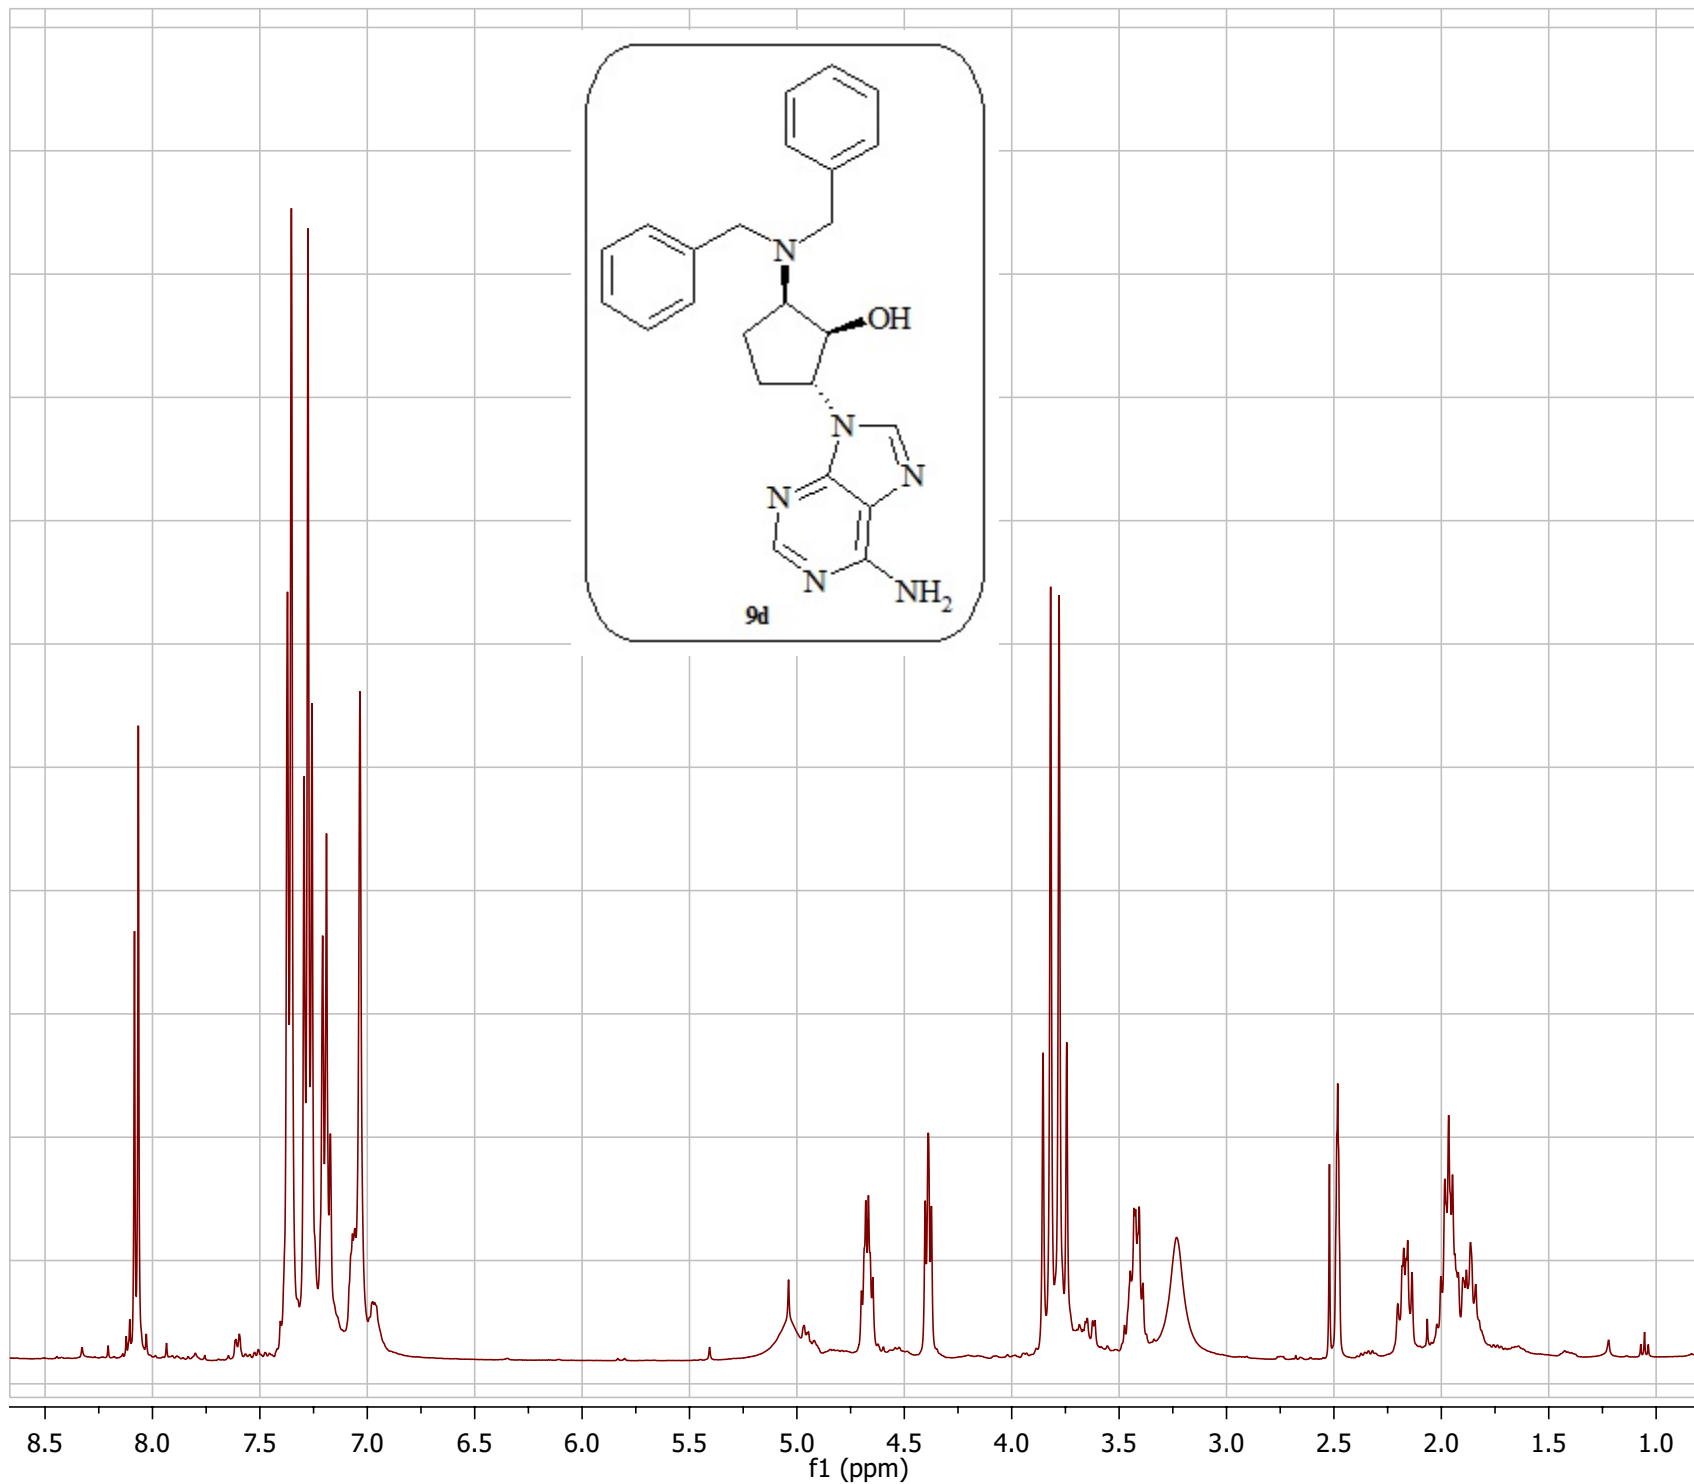

| Параметр                  | Значение       |
|---------------------------|----------------|
| 1 Origin                  | Varian         |
| 2 Spectrometer            | mercury        |
| 3 Author                  | vnmr1          |
| 4 Solvent                 | DMSO           |
| 5 Temperature             | 50.0           |
| 6 Pulse Sequence          | s2pul          |
| 7 Number of Scans         | 16             |
| 8 Receiver Gain           | 8              |
| 9 Relaxation Delay        | 3.0000         |
| 10 Pulse Width            | 0.0000         |
| 11 Acquisition Time       | 2.5000         |
| 12 Gradient Duration      | 0.0020         |
| 13 Spectrometer Frequency | 400.45         |
| 14 Spectral Width         | 3165.6         |
| 15 Lowest Frequency       | 304.0          |
| 16 Nucleus                | <sup>1</sup> H |
| 17 Acquired Size          | 7914           |
| 18 Spectral Size          | 16384          |

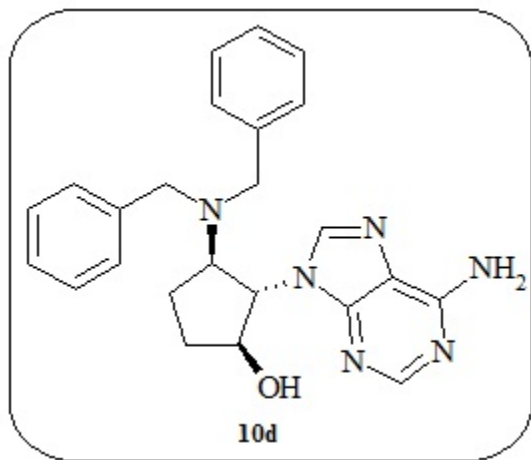

| Параметр                  | Значение       |
|---------------------------|----------------|
| 1 Origin                  | Varian         |
| 2 Spectrometer            | mercury        |
| 3 Author                  | vnmr1          |
| 4 Solvent                 | DMSO           |
| 5 Temperature             | 50.0           |
| 6 Pulse Sequence          | s2pul          |
| 7 Number of Scans         | 16             |
| 8 Receiver Gain           | 12             |
| 9 Relaxation Delay        | 3.0000         |
| 10 Pulse Width            | 0.0000         |
| 11 Acquisition Time       | 2.4999         |
| 12 Gradient Duration      | 0.0020         |
| 13 Spectrometer Frequency | 400.45         |
| 14 Spectral Width         | 3273.3         |
| 15 Lowest Frequency       | 193.2          |
| 16 Nucleus                | <sup>1</sup> H |
| 17 Acquired Size          | 8183           |
| 18 Spectral Size          | 16384          |

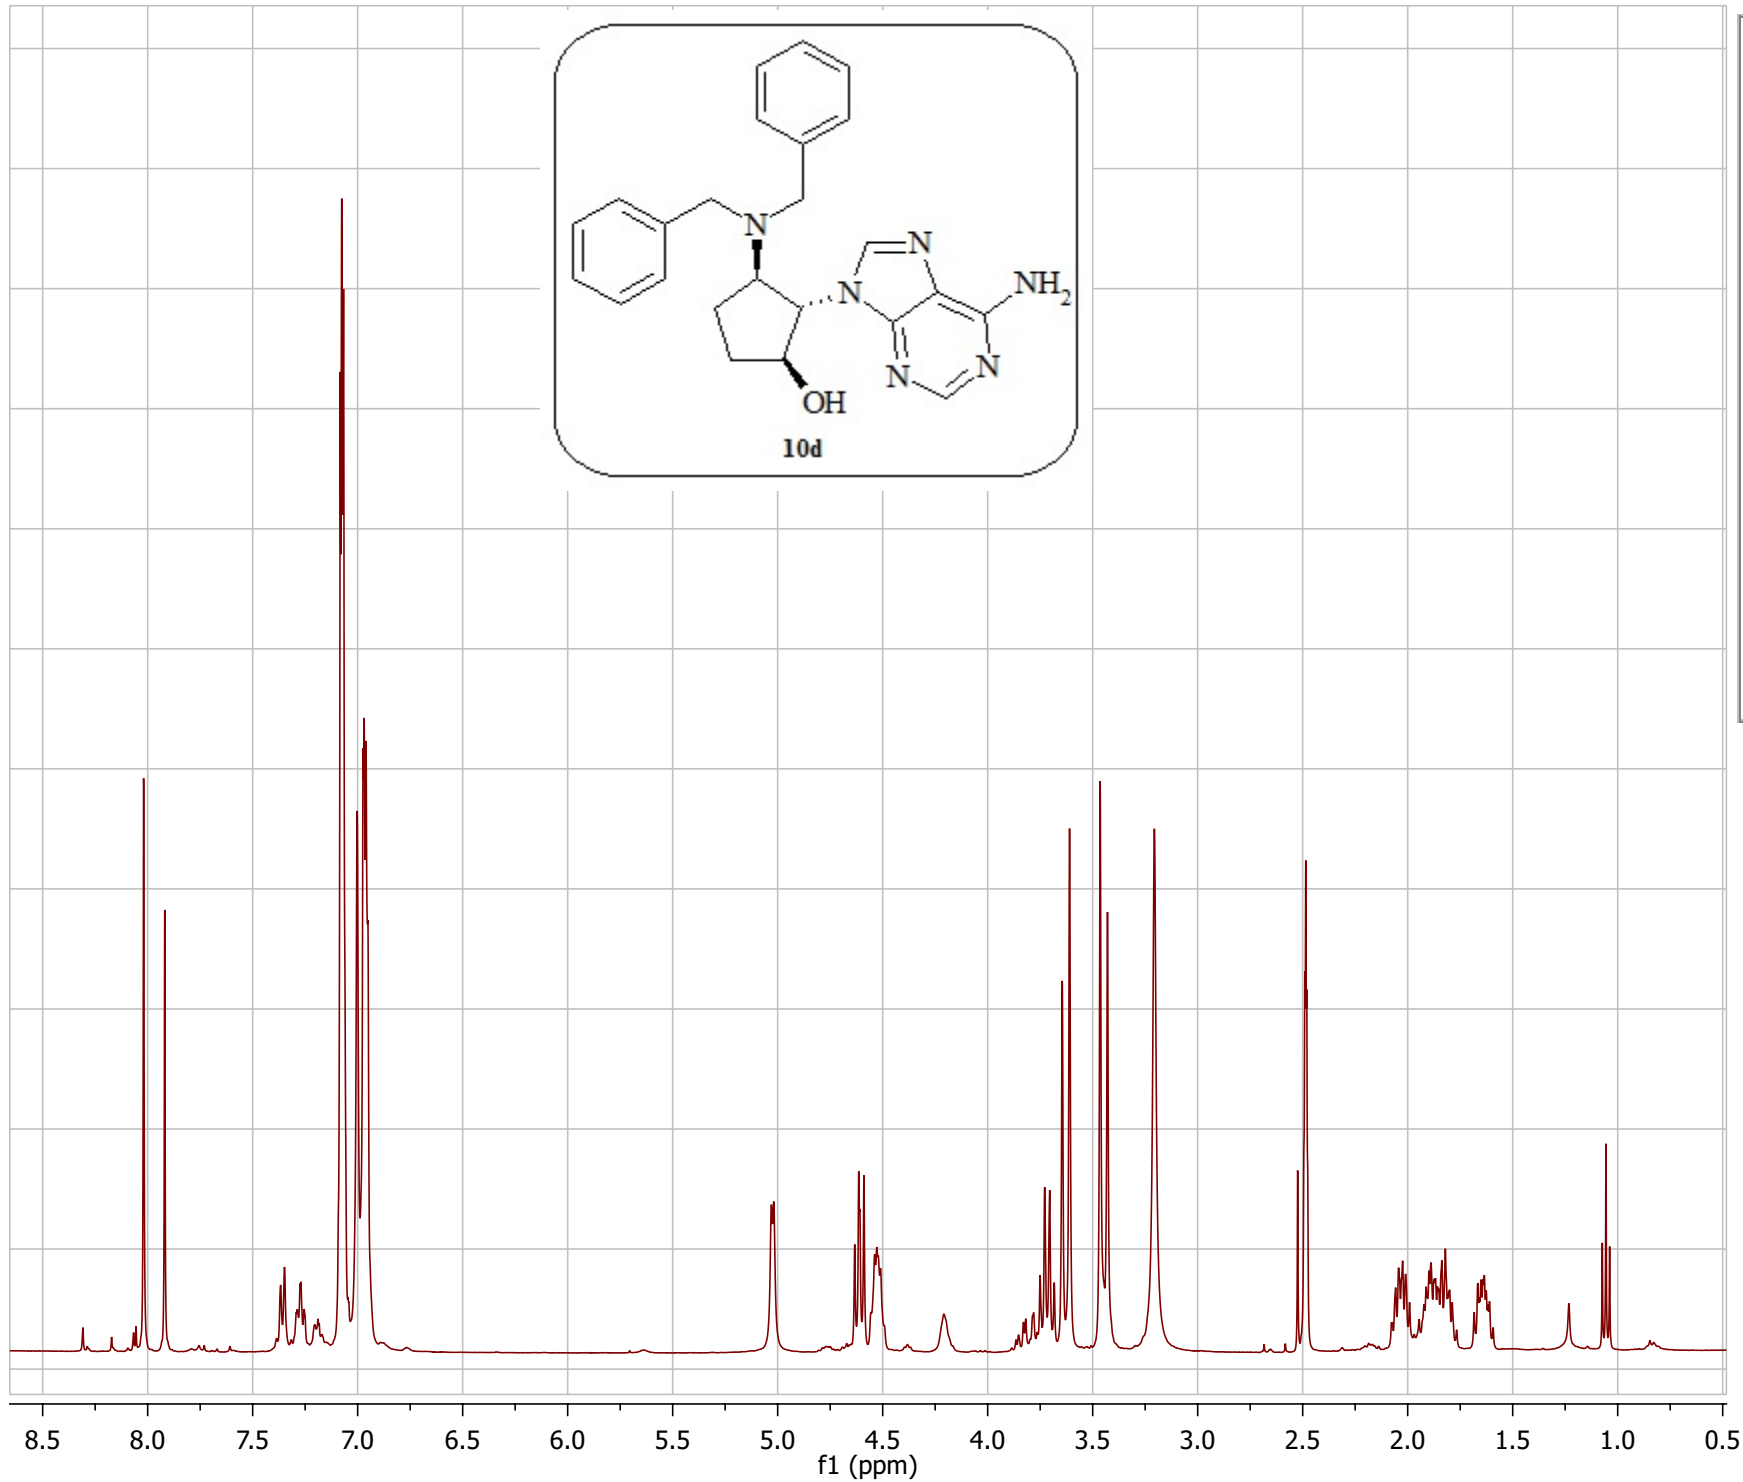



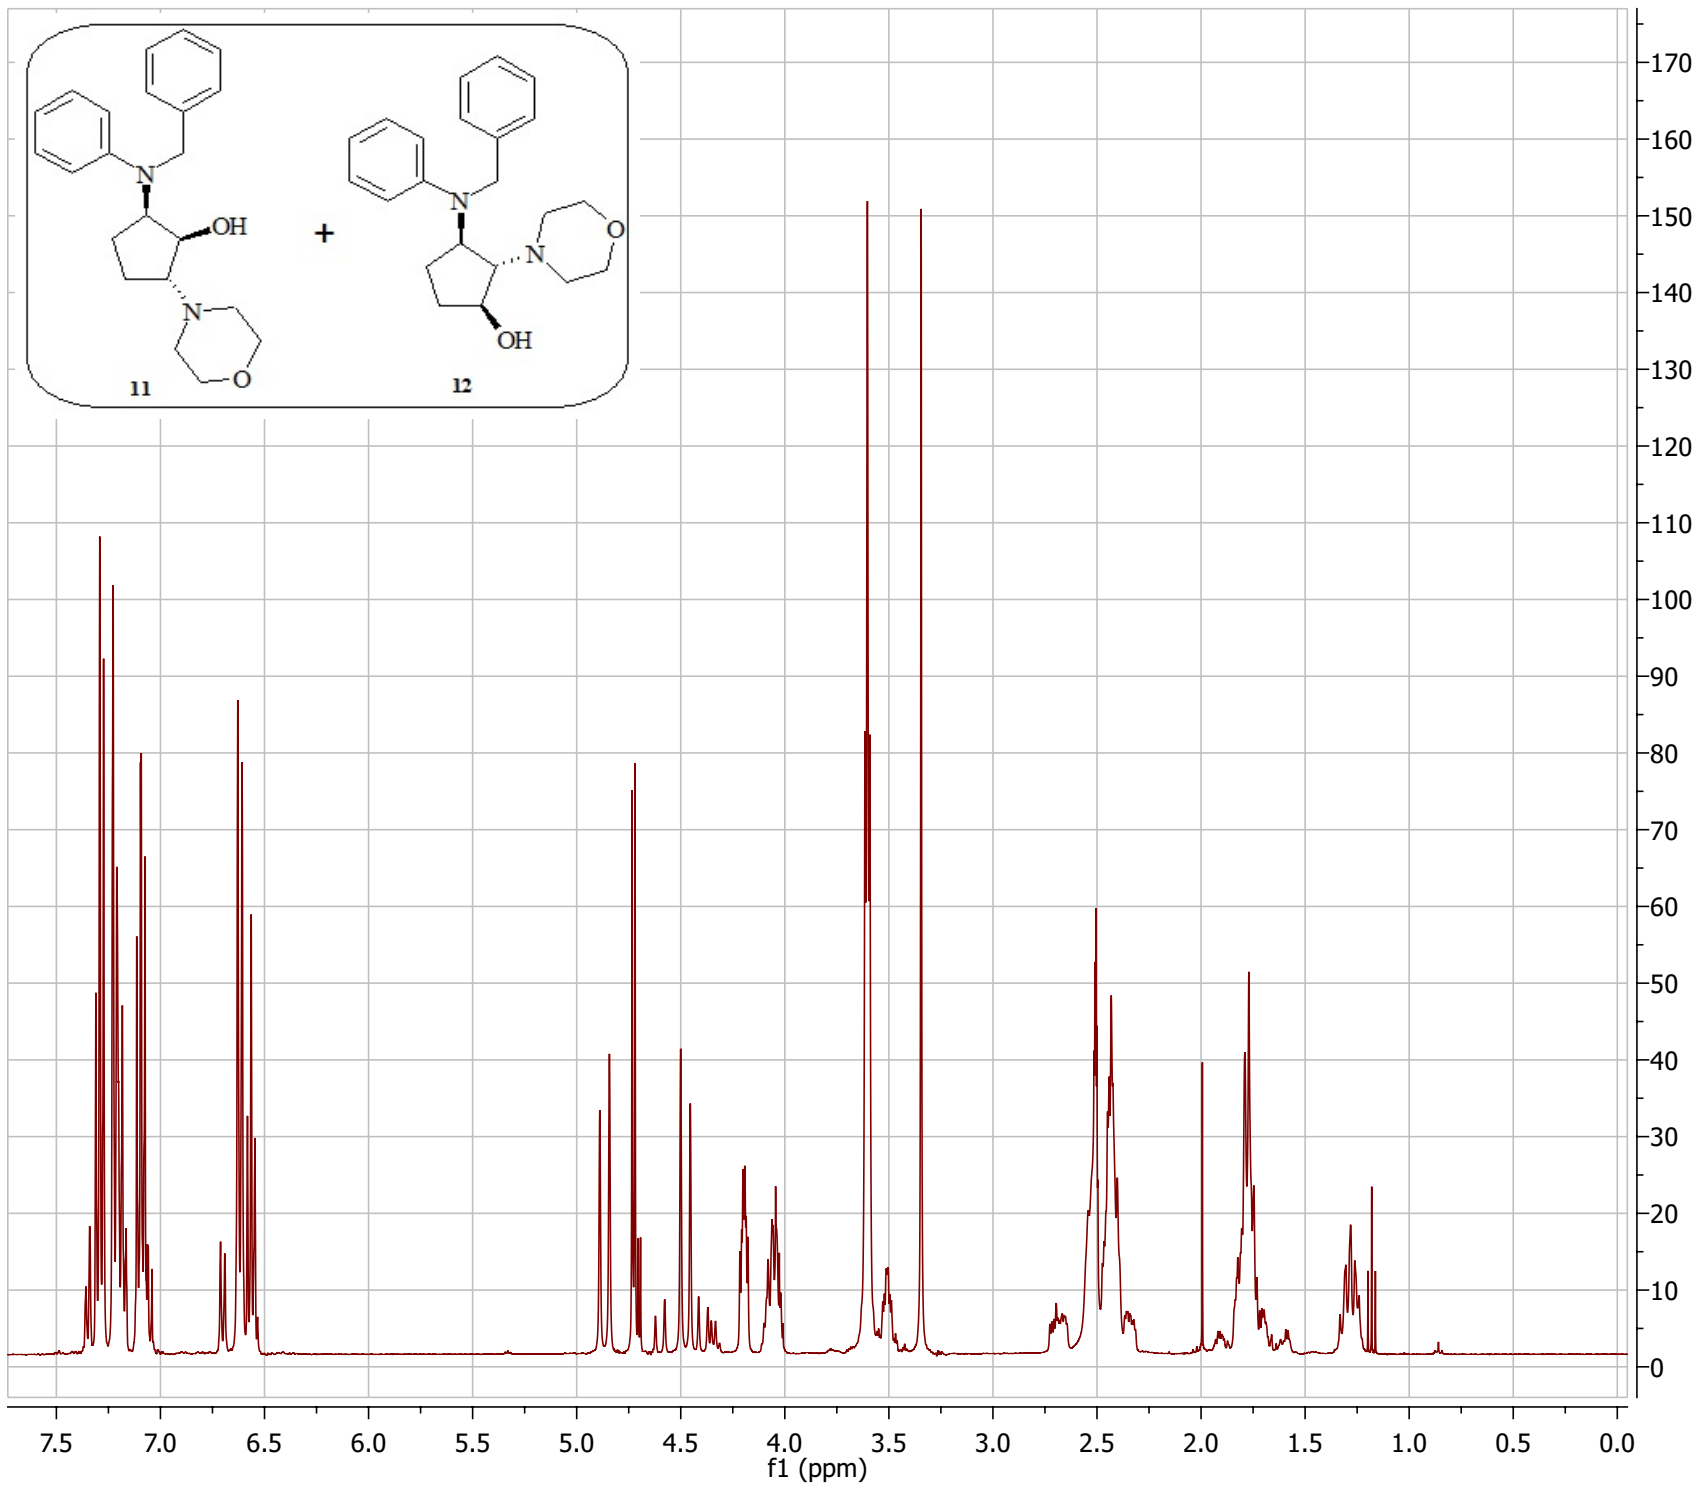

| Параметр                  | Значение |
|---------------------------|----------|
| 1 Origin                  | Varian   |
| 2 Spectrometer            | vnmrs    |
| 3 Author                  | chemp    |
| 4 Solvent                 | dms0     |
| 5 Temperature             | 34.0     |
| 6 Pulse Sequence          | s2pul    |
| 7 Number of Scans         | 16       |
| 8 Receiver Gain           | 30       |
| 9 Relaxation Delay        | 1.0000   |
| 10 Pulse Width            | 0.0000   |
| 11 Acquisition Time       | 2.5559   |
| 12 Gradient Duration      | 0.0010   |
| 13 Spectrometer Frequency | 399.70   |
| 14 Spectral Width         | 6410.3   |
| 15 Lowest Frequency       | -784.9   |
| 16 Nucleus                | 1H       |
| 17 Acquired Size          | 16384    |
| 18 Spectral Size          | 32768    |

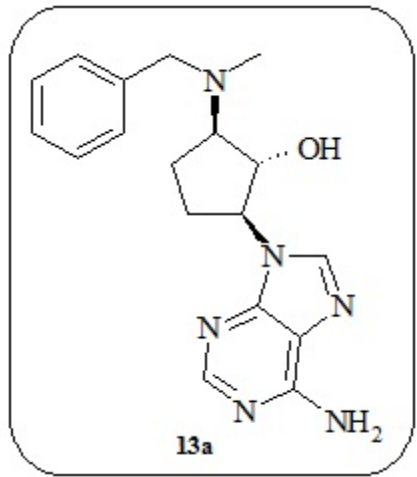

| Параметр                  | Значение       |
|---------------------------|----------------|
| 1 Origin                  | Varian         |
| 2 Spectrometer            | mercury        |
| 3 Author                  | vnmr1          |
| 4 Solvent                 | pyridine       |
| 5 Temperature             | 50.0           |
| 6 Pulse Sequence          | s2pul          |
| 7 Number of Scans         | 16             |
| 8 Receiver Gain           | 16             |
| 9 Relaxation Delay        | 3.0000         |
| 10 Pulse Width            | 0.0000         |
| 11 Acquisition Time       | 2.4998         |
| 12 Gradient Duration      | 0.0020         |
| 13 Spectrometer Frequency | 400.45         |
| 14 Spectral Width         | 2976.2         |
| 15 Lowest Frequency       | 790.3          |
| 16 Nucleus                | <sup>1</sup> H |
| 17 Acquired Size          | 7440           |
| 18 Spectral Size          | 16384          |

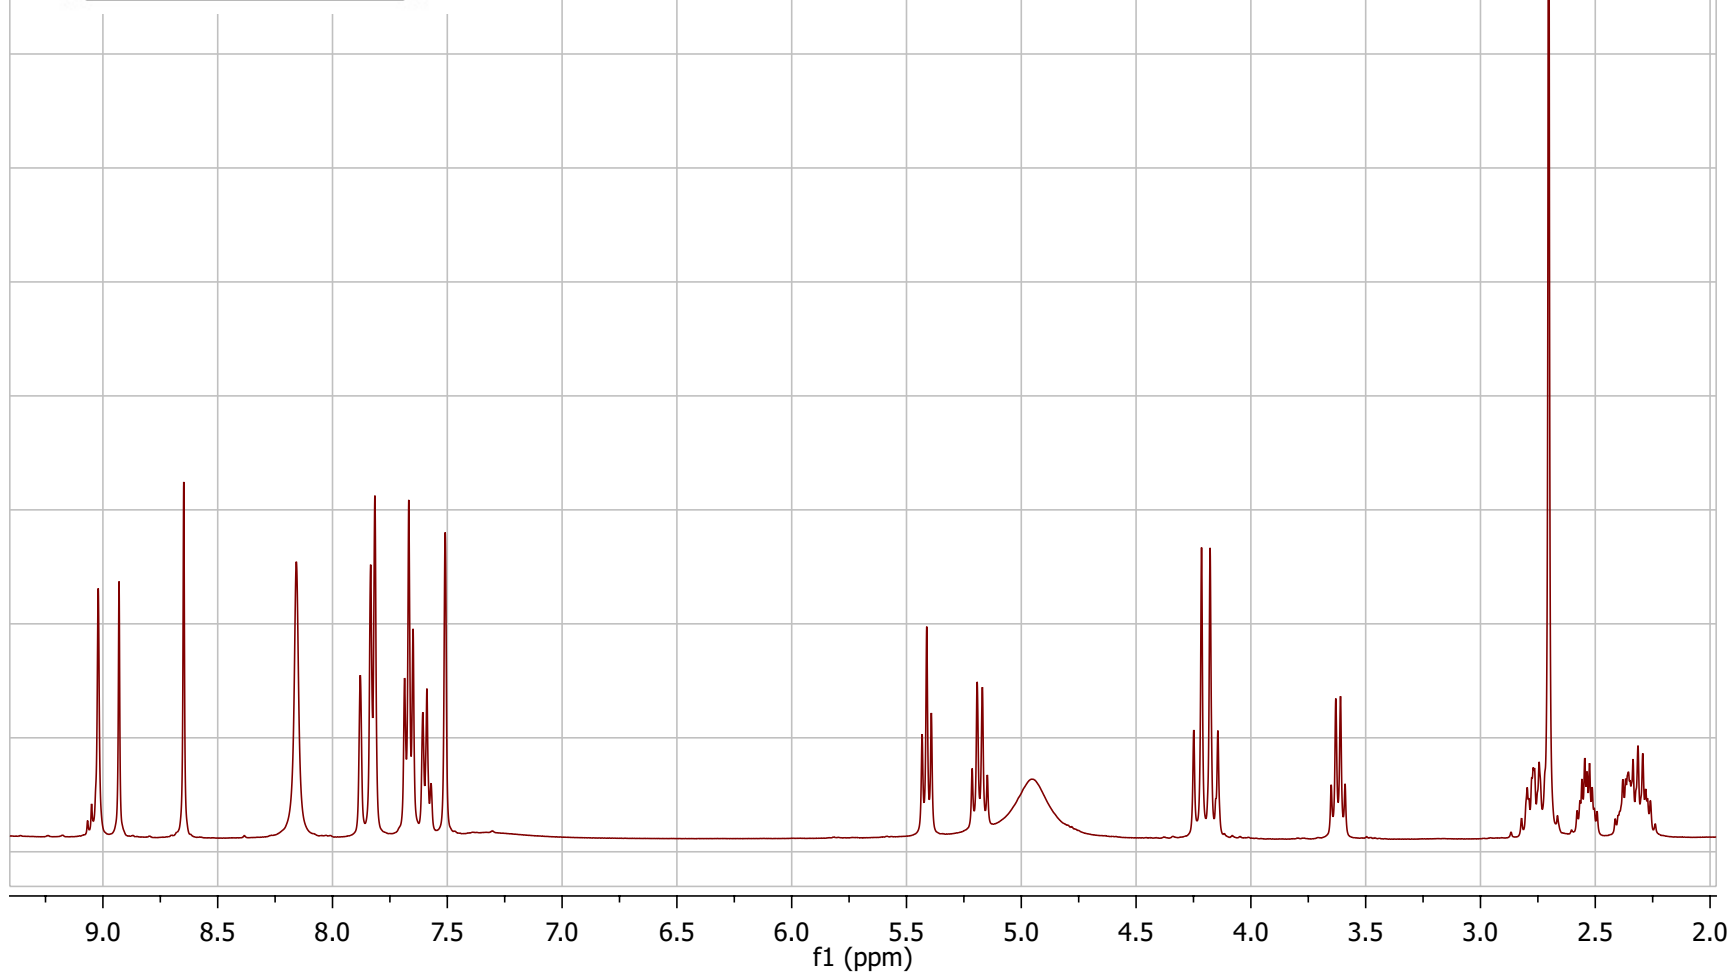

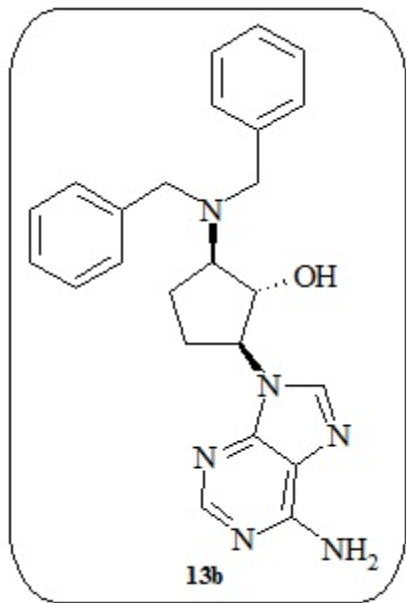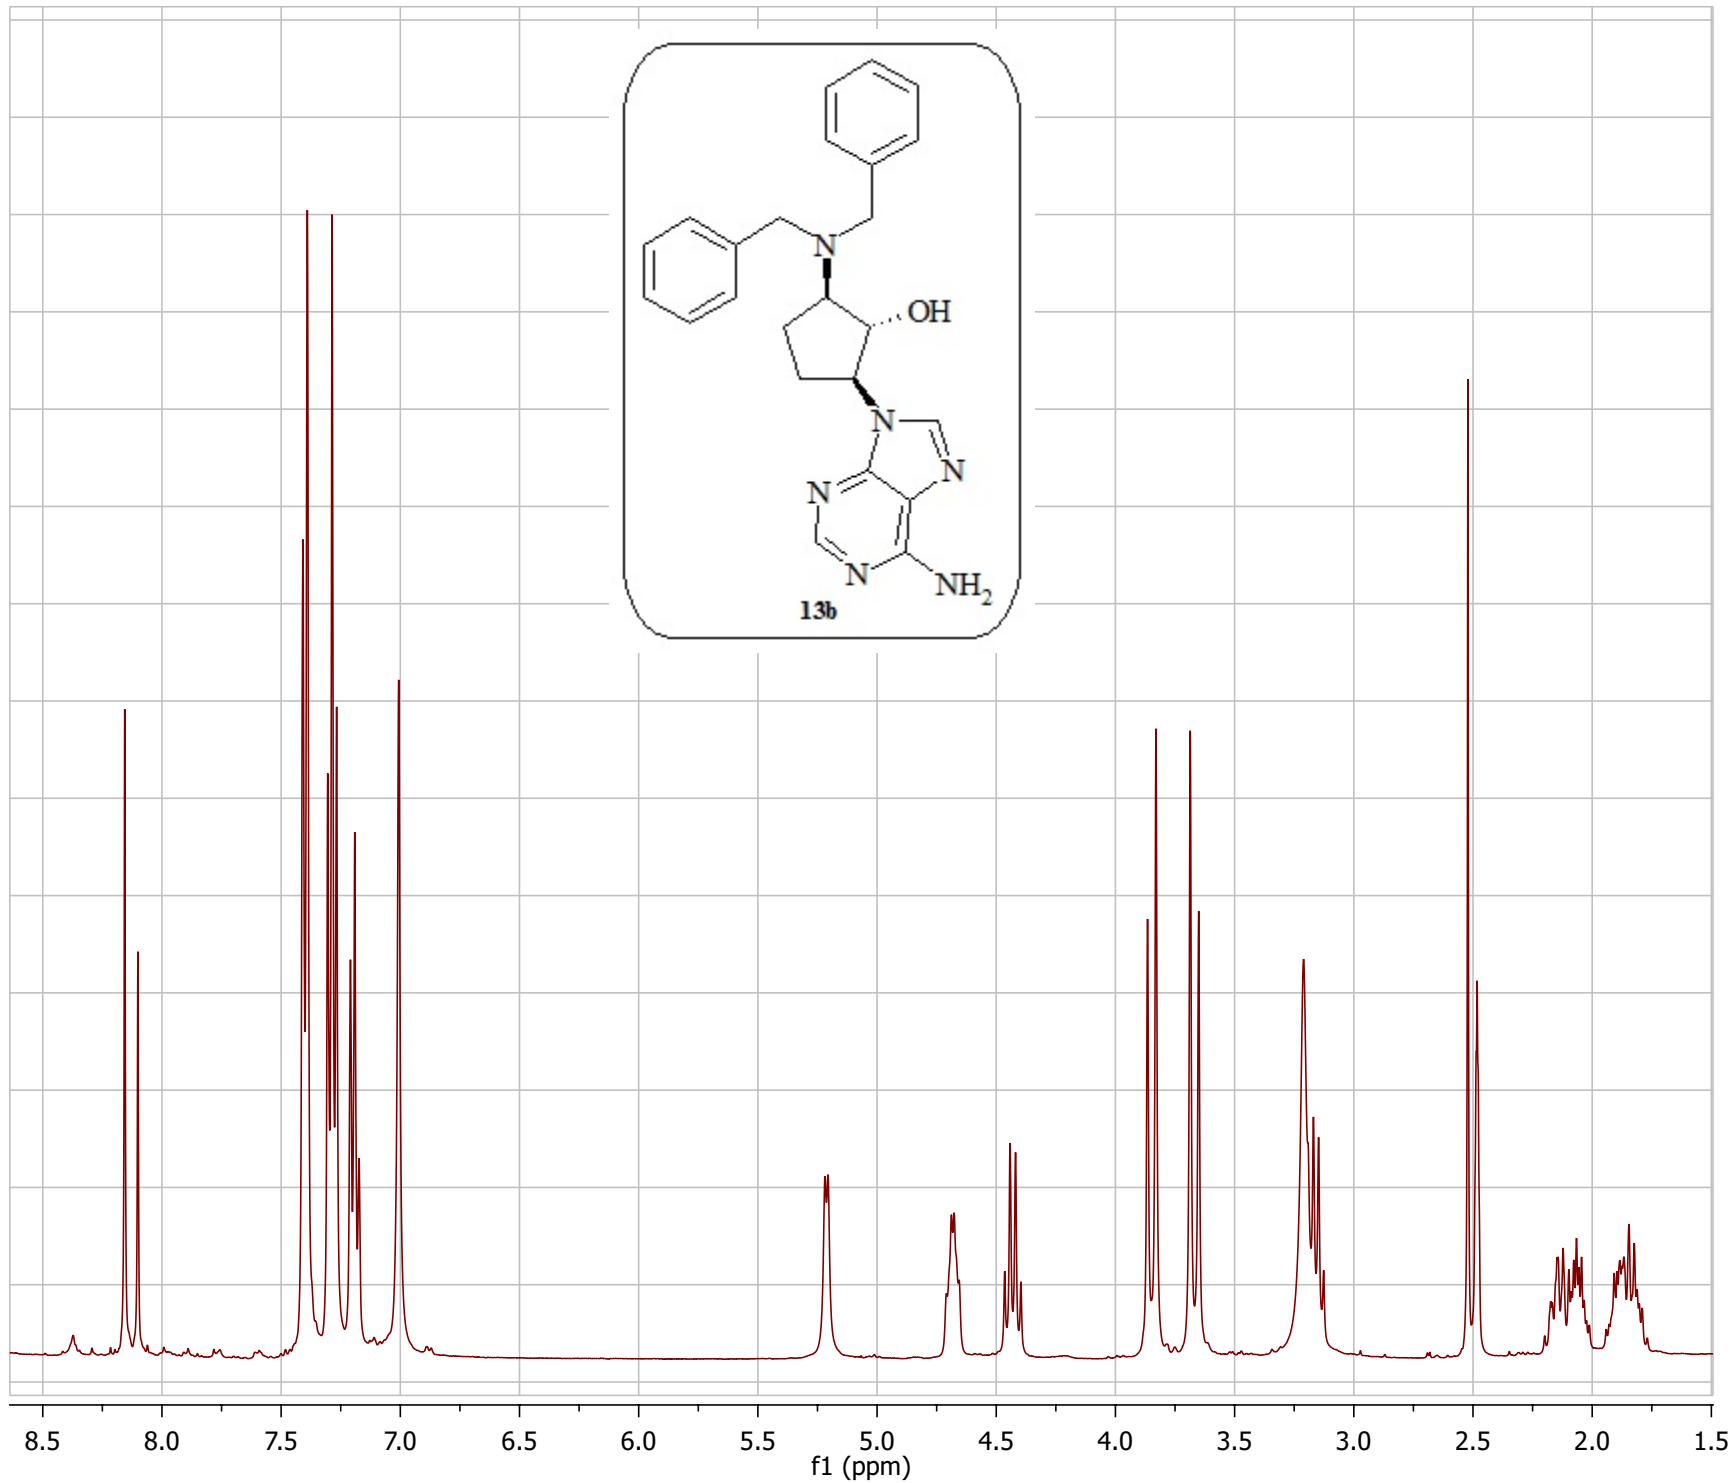

| Параметр                  | Значение       |
|---------------------------|----------------|
| 1 Origin                  | Varian         |
| 2 Spectrometer            | mercury        |
| 3 Author                  | vnmr1          |
| 4 Solvent                 | DMSO           |
| 5 Temperature             | 50.0           |
| 6 Pulse Sequence          | s2pul          |
| 7 Number of Scans         | 16             |
| 8 Receiver Gain           | 8              |
| 9 Relaxation Delay        | 3.0000         |
| 10 Pulse Width            | 0.0000         |
| 11 Acquisition Time       | 2.5000         |
| 12 Gradient Duration      | 0.0020         |
| 13 Spectrometer Frequency | 400.45         |
| 14 Spectral Width         | 2861.2         |
| 15 Lowest Frequency       | 598.0          |
| 16 Nucleus                | <sup>1</sup> H |
| 17 Acquired Size          | 7153           |
| 18 Spectral Size          | 16384          |

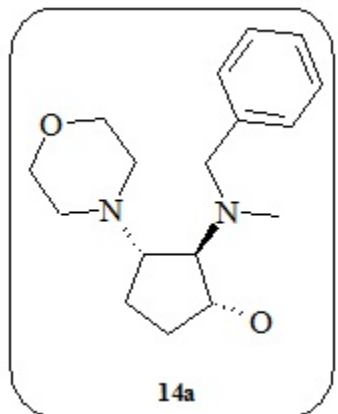

| Параметр                  | Значение       |
|---------------------------|----------------|
| 1 Origin                  | Varian         |
| 2 Spectrometer            | mercury        |
| 3 Author                  | vnmr1          |
| 4 Solvent                 | DMSO           |
| 5 Temperature             | 50.0           |
| 6 Pulse Sequence          | s2pul          |
| 7 Number of Scans         | 16             |
| 8 Receiver Gain           | 6              |
| 9 Relaxation Delay        | 3.0000         |
| 10 Pulse Width            | 0.0000         |
| 11 Acquisition Time       | 2.5035         |
| 12 Gradient Duration      | 0.0020         |
| 13 Spectrometer Frequency | 400.45         |
| 14 Spectral Width         | 2717.4         |
| 15 Lowest Frequency       | 356.6          |
| 16 Nucleus                | <sup>1</sup> H |
| 17 Acquired Size          | 6803           |
| 18 Spectral Size          | 16384          |

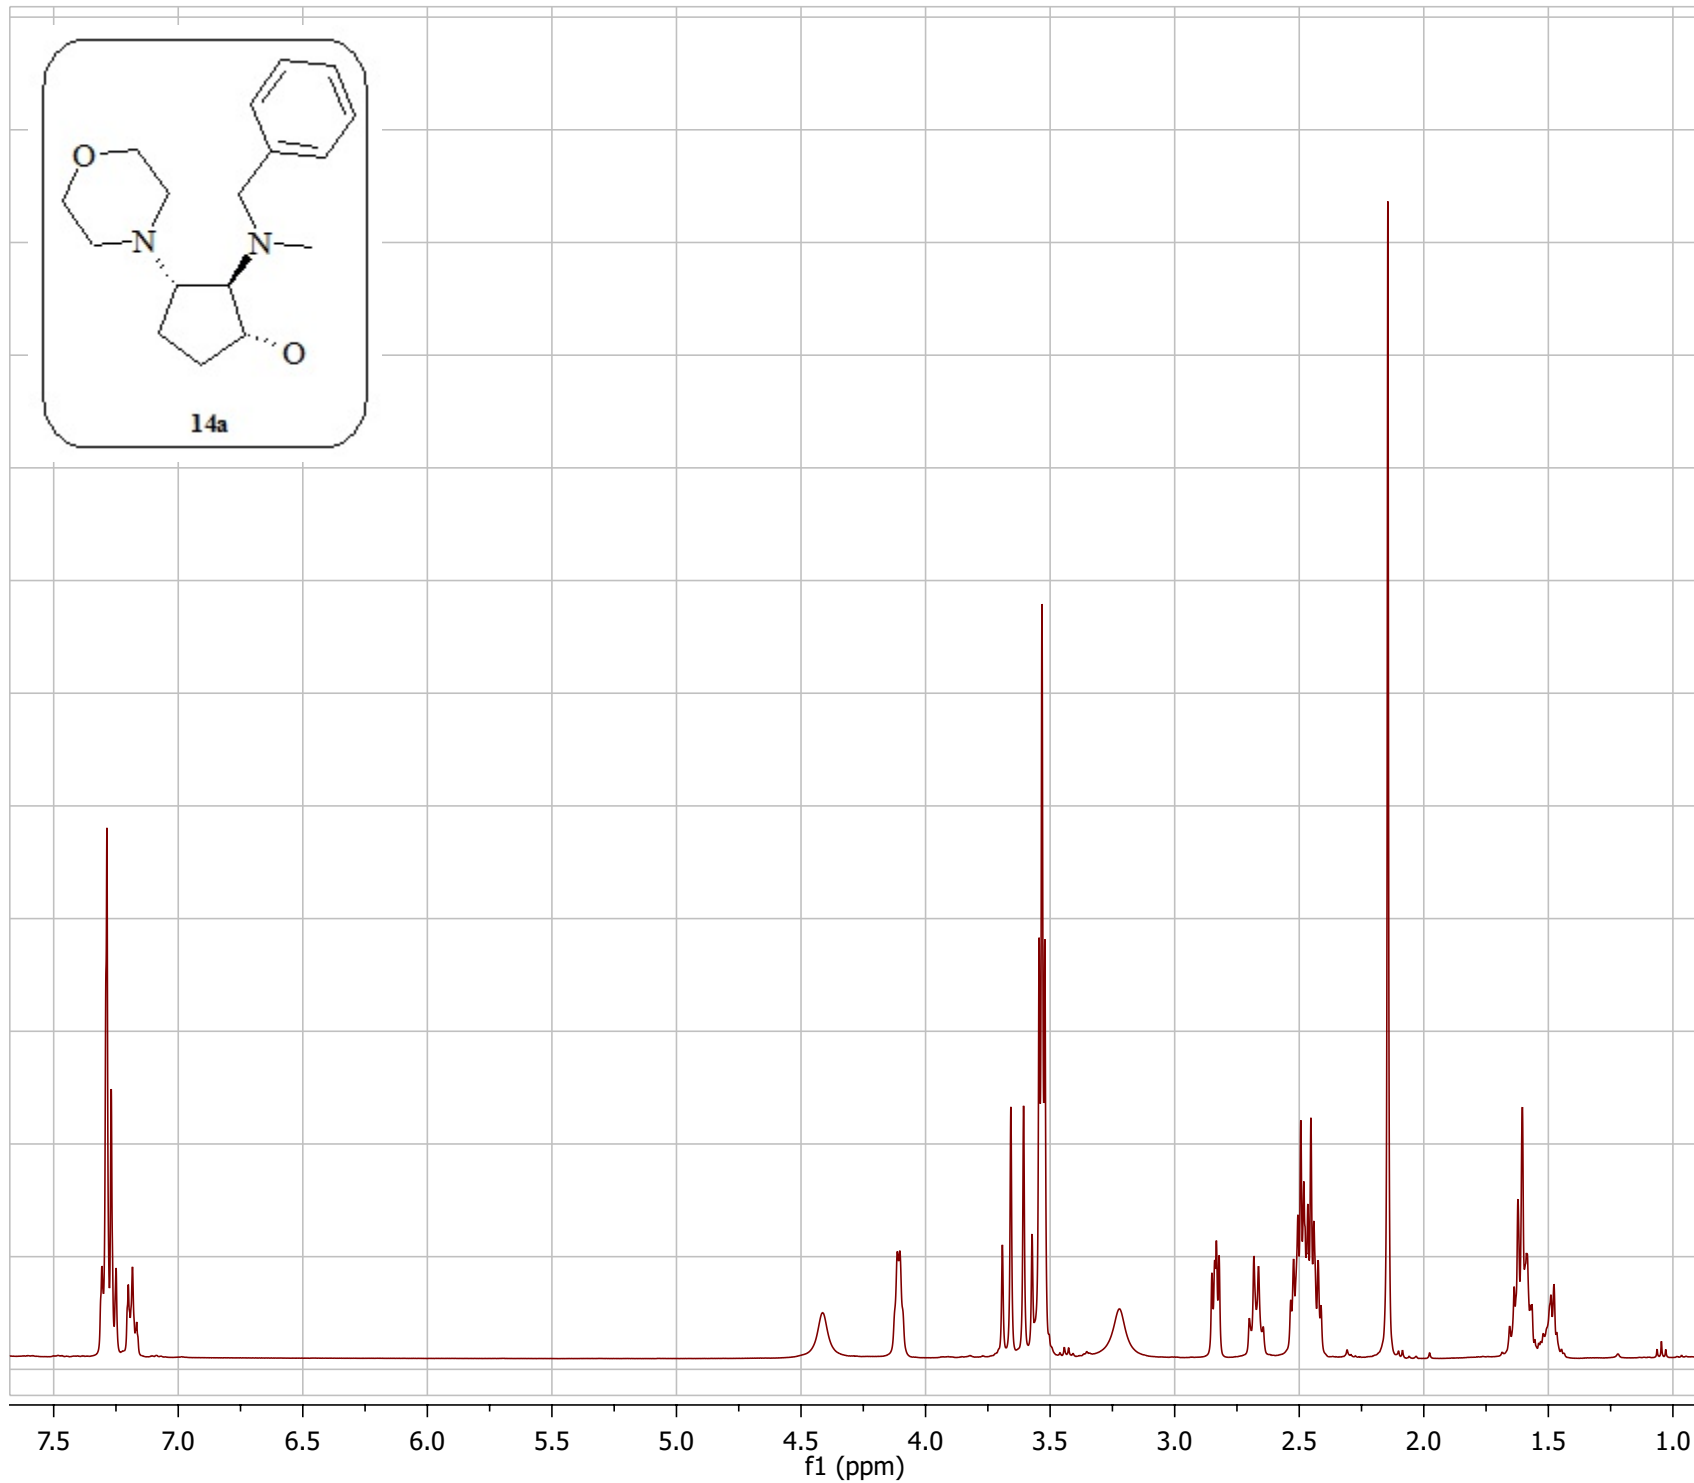

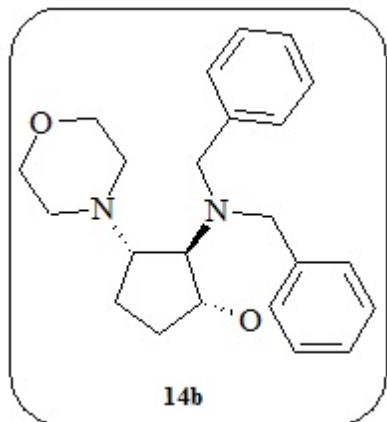

| Параметр                  | Значение       |
|---------------------------|----------------|
| 1 Origin                  | Varian         |
| 2 Spectrometer            | mercury        |
| 3 Author                  | vnmr1          |
| 4 Solvent                 | DMSO           |
| 5 Temperature             | 50.0           |
| 6 Pulse Sequence          | s2pul          |
| 7 Number of Scans         | 4              |
| 8 Receiver Gain           | 8              |
| 9 Relaxation Delay        | 3.0000         |
| 10 Pulse Width            | 0.0000         |
| 11 Acquisition Time       | 1.3996         |
| 12 Gradient Duration      | 0.0020         |
| 13 Spectrometer Frequency | 400.45         |
| 14 Spectral Width         | 2637.8         |
| 15 Lowest Frequency       | 377.3          |
| 16 Nucleus                | <sup>1</sup> H |
| 17 Acquired Size          | 3692           |
| 18 Spectral Size          | 8192           |

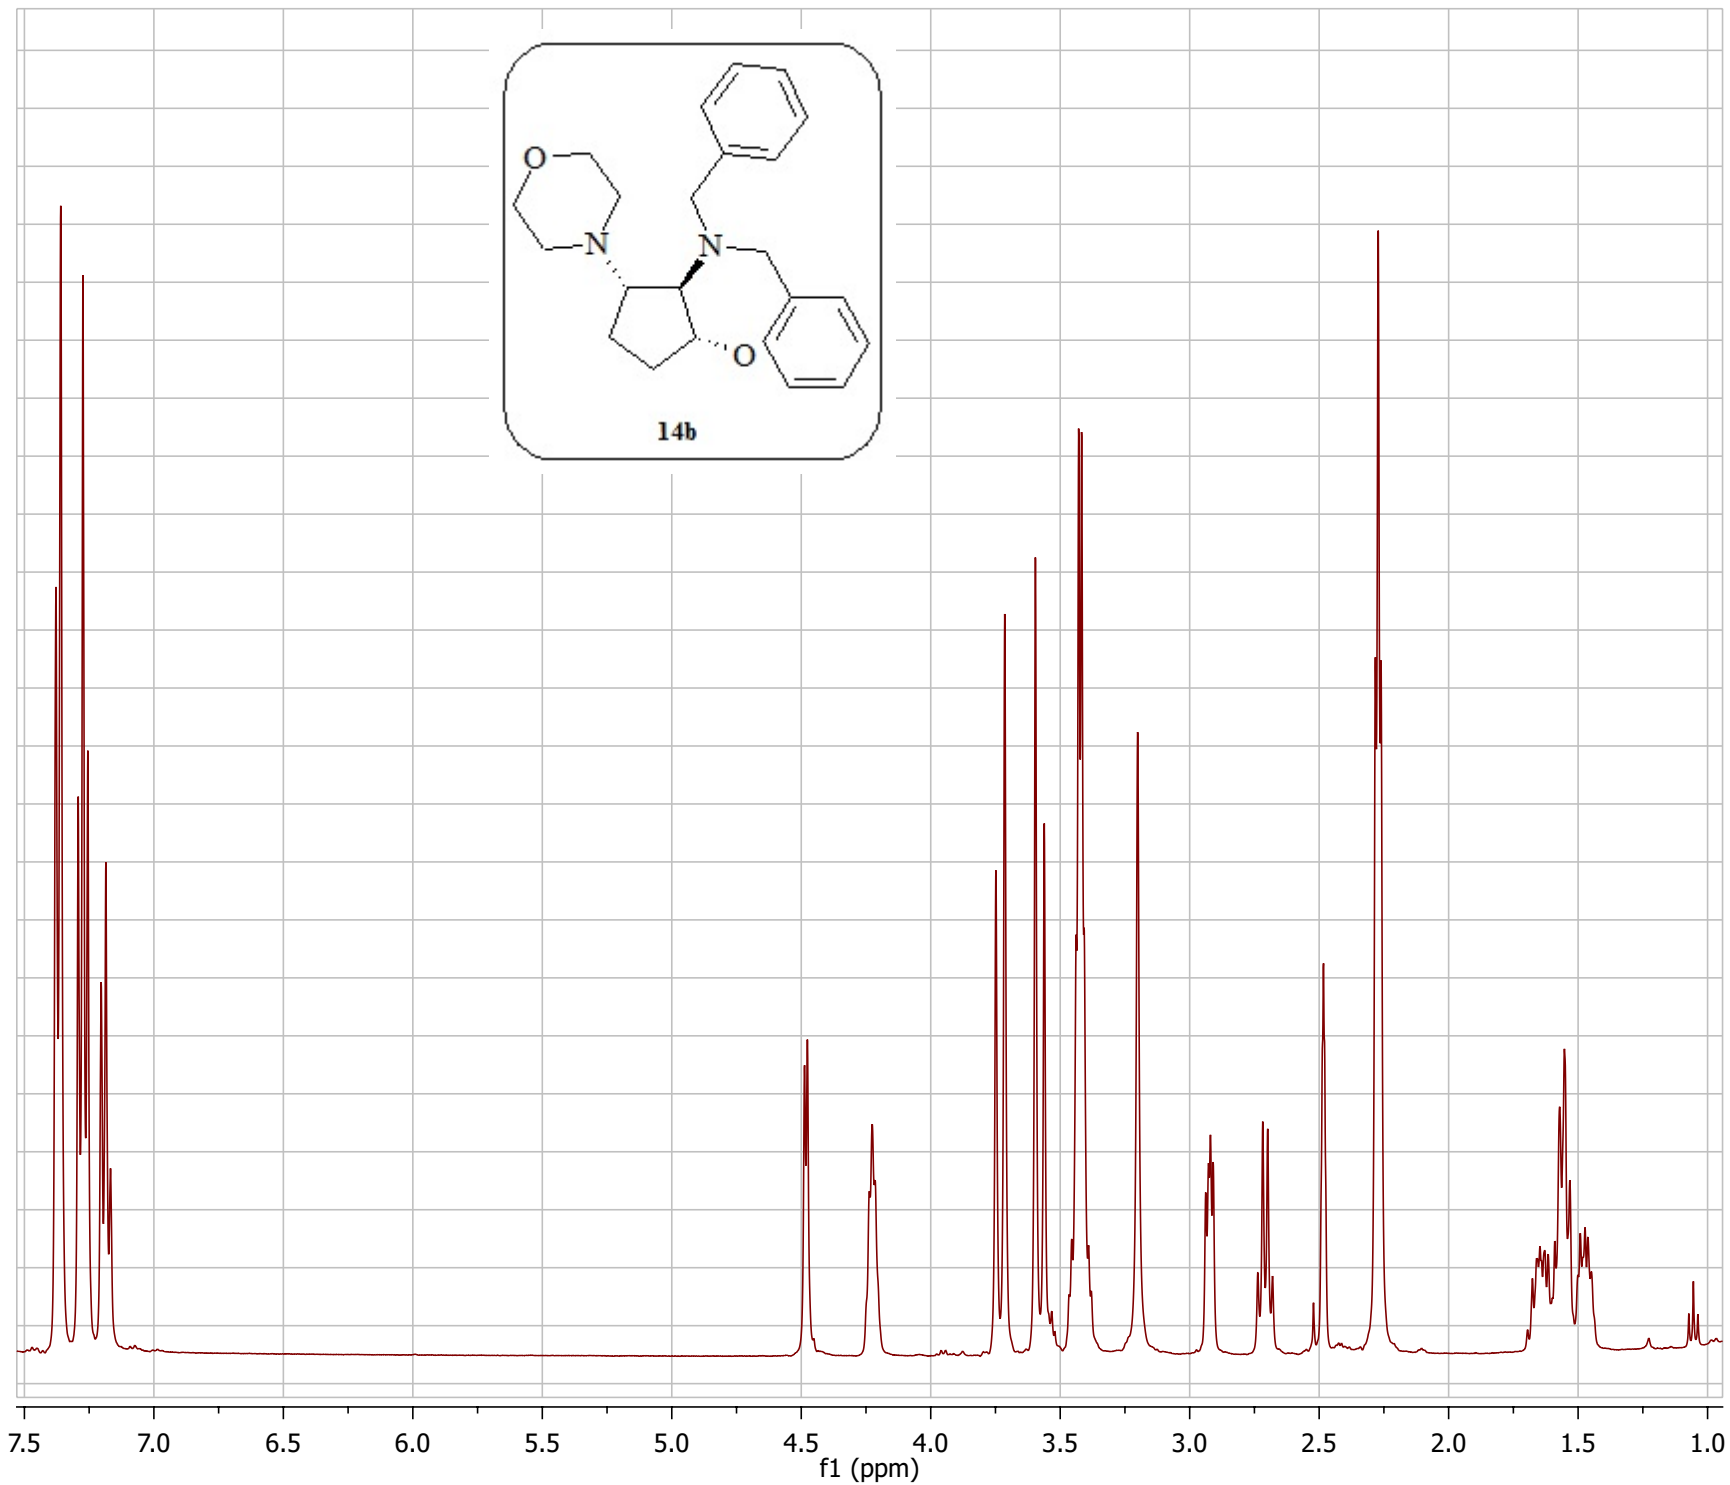

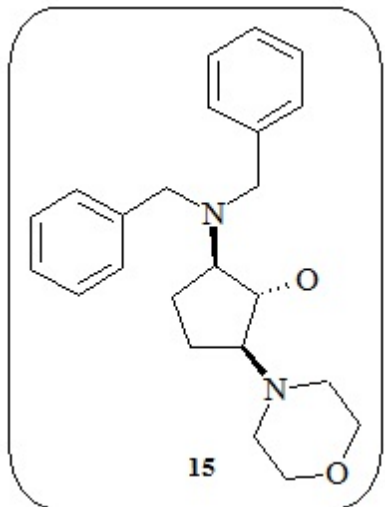

| Параметр                  | Значение       |
|---------------------------|----------------|
| 1 Origin                  | Varian         |
| 2 Spectrometer            | mercury        |
| 3 Author                  | vnmr1          |
| 4 Solvent                 | DMSO           |
| 5 Temperature             | 50.0           |
| 6 Pulse Sequence          | s2pul          |
| 7 Number of Scans         | 4              |
| 8 Receiver Gain           | 8              |
| 9 Relaxation Delay        | 3.0000         |
| 10 Pulse Width            | 0.0000         |
| 11 Acquisition Time       | 1.4007         |
| 12 Gradient Duration      | 0.0020         |
| 13 Spectrometer Frequency | 400.45         |
| 14 Spectral Width         | 2732.2         |
| 15 Lowest Frequency       | 286.3          |
| 16 Nucleus                | <sup>1</sup> H |
| 17 Acquired Size          | 3827           |
| 18 Spectral Size          | 8192           |

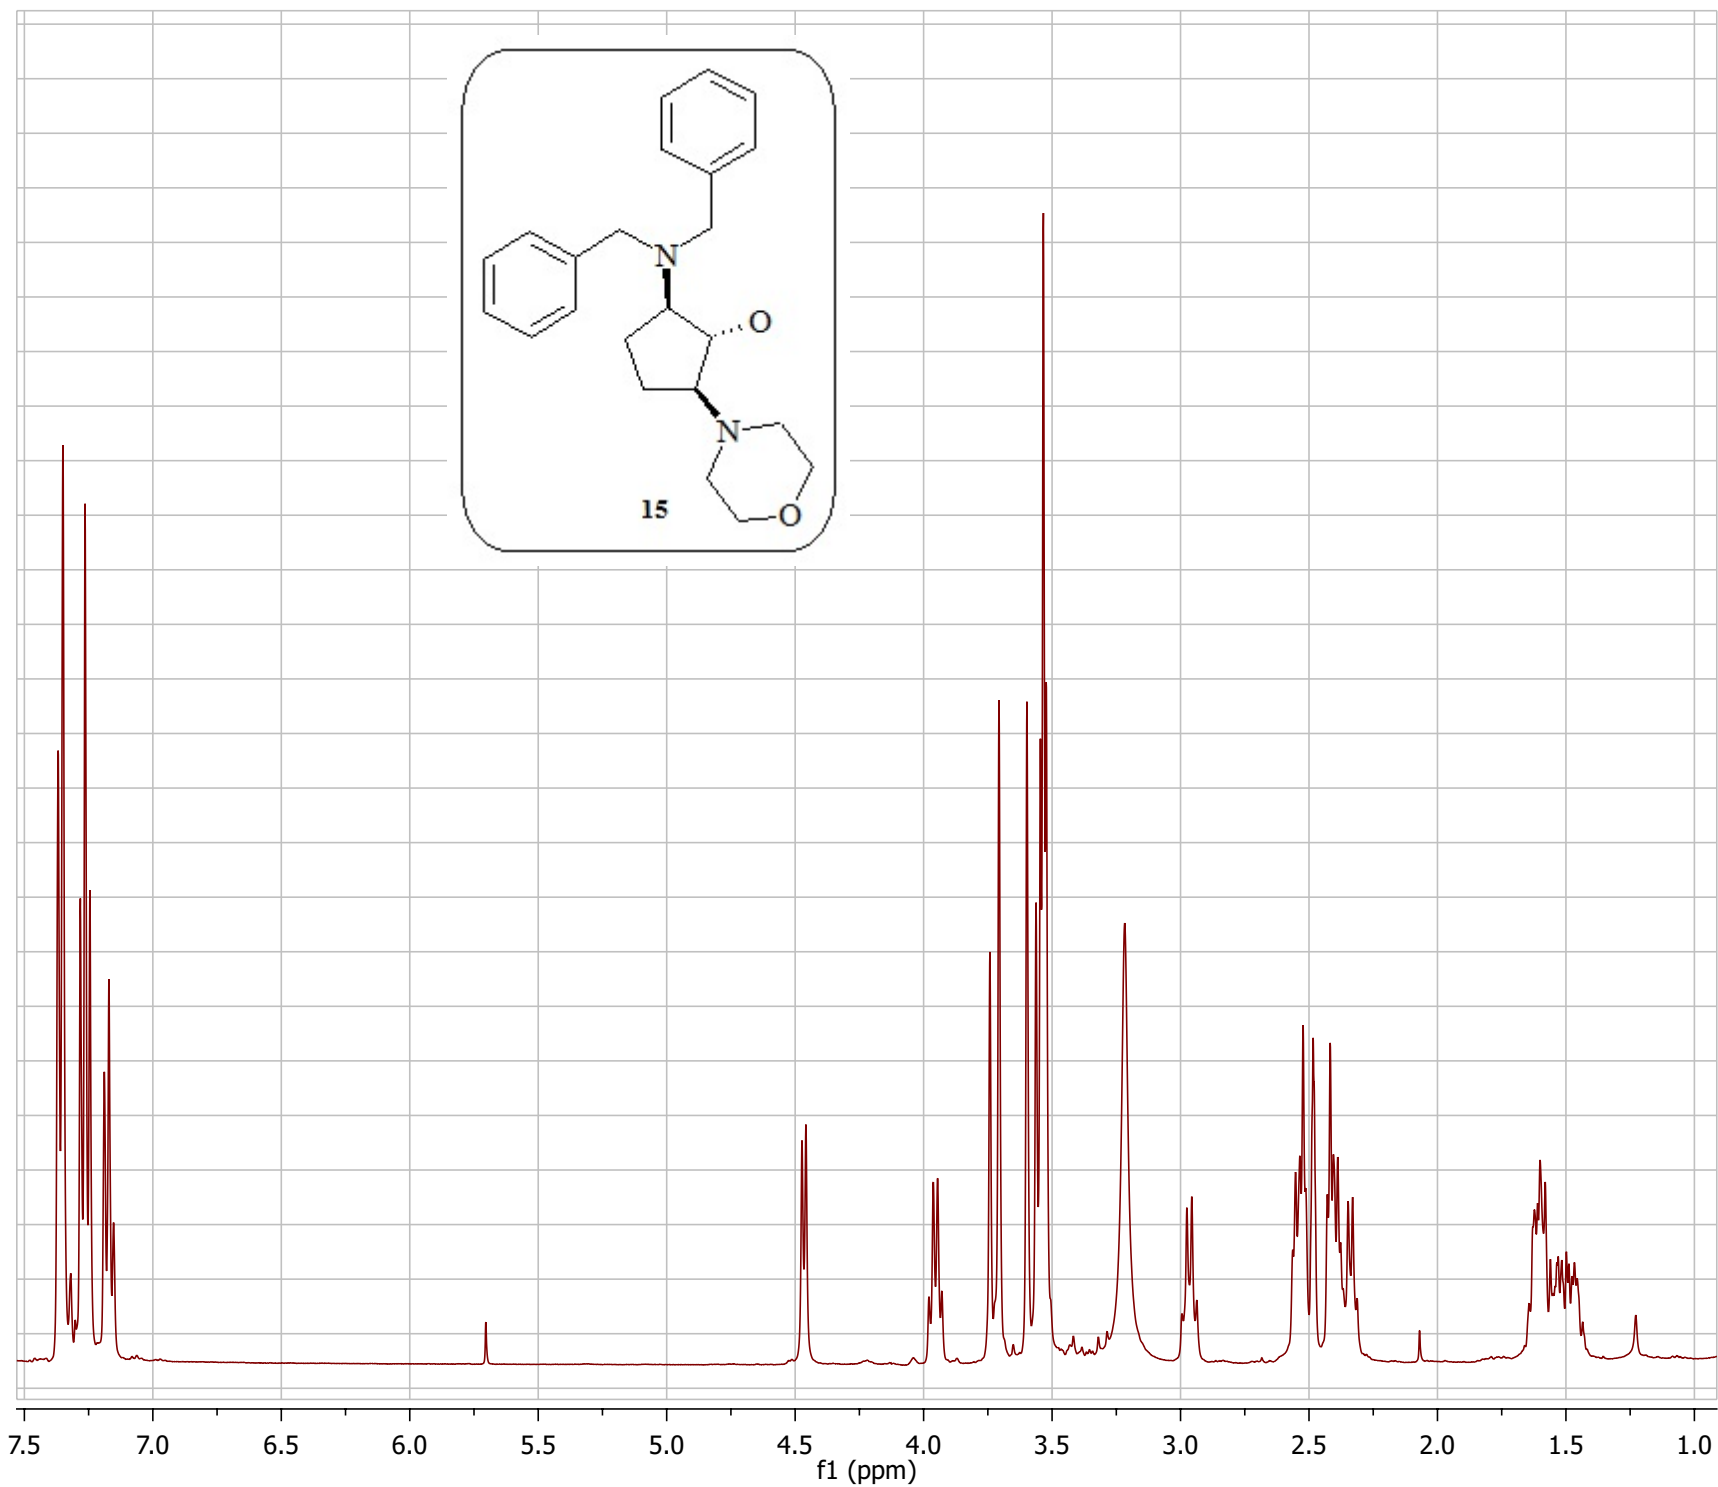

Supplement: Additional file 2 [file 1860-5397-10-262-S2.pdf]
